# Supplementary material for: Comparative Genomic Analysis of a Novel Strain of Taiwan Hot-Spring Cyanobacterium Thermosynechococcus sp. CL-1
Source: Front Microbiol. 2020 Jan 31;11:82. doi: 10.3389/fmicb.2020.00082 (PMC7005997; doi:10.3389/fmicb.2020.00082)
Supplement: TABLE S1 — Homologous gene clusters among representative thermophilic cyanobacteria genomes. Each row in the table lists one protein-coding gene; the cluster id (as assigned by OrthoMCL), and other information (e.g., genomic location and annotation) are included. Genes sharing the same cluster id are considered as homologs. Genes without any identifiable homolog were assigned to their own clusters with unique ids (i.e., singletons). [file Table_1.XLSX]

## Sheet: Sheet1
Cluster	Strain	Locus_tag	Contig	Start	End	Length	Strand	Gene	Product
0	Sl_PCC6715	BRW62_RS01990	NZ_CP018092	388241	388504	264	1	NA	transposase
0	Sl_PCC6715	BRW62_RS07225	NZ_CP018092	1427694	1428383	690	1	NA	transposase
0	Sl_PCC6715	BRW62_RS12830	NZ_CP018092	2631738	2632001	264	1	NA	transposase
0	Te_BP_1	tll0205	NC_004113	185743	186915	1173	-1	NA	transposase
0	Te_BP_1	tll0222	NC_004113	202481	203653	1173	-1	NA	transposase
0	Te_BP_1	tll0512	NC_004113	508223	509395	1173	-1	NA	transposase
0	Te_BP_1	tll0604	NC_004113	611416	612588	1173	-1	NA	transposase
0	Te_BP_1	tll0687	NC_004113	706573	707799	1227	-1	NA	transposase
0	Te_BP_1	tll0964	NC_004113	987266	988438	1173	-1	NA	transposase
0	Te_BP_1	tll1152	NC_004113	1183861	1185033	1173	-1	NA	transposase
0	Te_BP_1	tll1162	NC_004113	1200443	1201669	1227	-1	NA	transposase
0	Te_BP_1	tll1374	NC_004113	1441028	1442200	1173	-1	NA	transposase
0	Te_BP_1	tll2004	NC_004113	2091812	2092984	1173	-1	NA	transposase
0	Te_BP_1	tll2431	NC_004113	2545453	2546679	1227	-1	NA	transposase
0	Te_BP_1	tlr0134	NC_004113	114353	115579	1227	1	NA	transposase
0	Te_BP_1	tlr0273	NC_004113	257476	258648	1173	1	NA	transposase
0	Te_BP_1	tlr0406	NC_004113	403394	404566	1173	1	NA	transposase
0	Te_BP_1	tlr1127	NC_004113	1159903	1161090	1188	1	NA	transposase
0	Te_BP_1	tlr1489	NC_004113	1554706	1555878	1173	1	NA	transposase
0	Te_BP_1	tlr2179	NC_004113	2263217	2264389	1173	1	NA	transposase
0	Te_BP_1	tlr2182	NC_004113	2266280	2267452	1173	1	NA	transposase
0	Te_BP_1	tlr2199	NC_004113	2283094	2284266	1173	1	NA	transposase
0	Te_BP_1	tlr2376	NC_004113	2486239	2487411	1173	1	NA	transposase
0	Te_PKUAC_SCTE542	D3A95_06190	CP032152	1262026	1263306	1281	1	NA	transposase
0	Te_PKUAC_SCTE542	D3A95_09320	CP032152	1885946	1887226	1281	-1	NA	transposase
0	Te_PKUAC_SCTE542	D3A95_10180	CP032152	2038672	2039952	1281	-1	NA	transposase
0	Te_PKUAC_SCTE542	D3A95_10840	CP032152	2185913	2187193	1281	1	NA	transposase
0	Tv_NIES_2134	CDC40_RS00425	NZ_AP018202	84488	85660	1173	1	NA	IS200/IS605 family element transposase accessory protein TnpB
0	Tv_NIES_2134	CDC40_RS00890	NZ_AP018202	182232	183404	1173	-1	NA	IS200/IS605 family element transposase accessory protein TnpB
0	Tv_NIES_2134	CDC40_RS01635	NZ_AP018202	334286	335458	1173	-1	NA	IS200/IS605 family element transposase accessory protein TnpB
0	Tv_NIES_2134	CDC40_RS03885	NZ_AP018202	787632	788804	1173	-1	NA	IS200/IS605 family element transposase accessory protein TnpB
0	Tv_NIES_2134	CDC40_RS04330	NZ_AP018202	881697	882869	1173	-1	NA	IS200/IS605 family element transposase accessory protein TnpB
0	Tv_NIES_2134	CDC40_RS04790	NZ_AP018202	980633	981805	1173	-1	NA	IS200/IS605 family element transposase accessory protein TnpB
0	Tv_NIES_2134	CDC40_RS04980	NZ_AP018202	1020648	1021820	1173	-1	NA	IS200/IS605 family element transposase accessory protein TnpB
0	Tv_NIES_2134	CDC40_RS05495	NZ_AP018202	1117813	1119000	1188	-1	NA	IS200/IS605 family element transposase accessory protein TnpB
0	Tv_NIES_2134	CDC40_RS05840	NZ_AP018202	1180949	1182121	1173	1	NA	IS200/IS605 family element transposase accessory protein TnpB
0	Tv_NIES_2134	CDC40_RS06425	NZ_AP018202	1312145	1313317	1173	-1	NA	IS200/IS605 family element transposase accessory protein TnpB
0	Tv_NIES_2134	CDC40_RS06480	NZ_AP018202	1321480	1322652	1173	1	NA	IS200/IS605 family element transposase accessory protein TnpB
0	Tv_NIES_2134	CDC40_RS06955	NZ_AP018202	1431593	1432765	1173	1	NA	IS200/IS605 family element transposase accessory protein TnpB
0	Tv_NIES_2134	CDC40_RS07055	NZ_AP018202	1454929	1456116	1188	-1	NA	IS200/IS605 family element transposase accessory protein TnpB
0	Tv_NIES_2134	CDC40_RS07555	NZ_AP018202	1555836	1557008	1173	-1	NA	IS200/IS605 family element transposase accessory protein TnpB
0	Tv_NIES_2134	CDC40_RS08450	NZ_AP018202	1741032	1742204	1173	1	NA	IS200/IS605 family element transposase accessory protein TnpB
0	Tv_NIES_2134	CDC40_RS09425	NZ_AP018202	1934040	1935212	1173	1	NA	IS200/IS605 family element transposase accessory protein TnpB
0	Tv_NIES_2134	CDC40_RS11945	NZ_AP018202	2433253	2434425	1173	-1	NA	IS200/IS605 family element transposase accessory protein TnpB
1	T_CL_1	FFX45_07895	CP040671	1578277	1579182	906	1	NA	Rpn family recombination-promoting nuclease/putative transposase
1	T_CL_1	FFX45_07900	CP040671	1579186	1580103	918	1	NA	Rpn family recombination-promoting nuclease/putative transposase
1	T_CL_1	FFX45_07905	CP040671	1580107	1581084	978	1	NA	Rpn family recombination-promoting nuclease/putative transposase
1	T_CL_1	FFX45_07910	CP040671	1581088	1582041	954	1	NA	Rpn family recombination-promoting nuclease/putative transposase
1	T_CL_1	FFX45_10335	CP040671	2101727	2102704	978	1	NA	Rpn family recombination-promoting nuclease/putative transposase
1	T_CL_1	FFX45_10340	CP040671	2102708	2103577	870	1	NA	Rpn family recombination-promoting nuclease/putative transposase
1	T_CL_1	FFX45_10345	CP040671	2103581	2104510	930	1	NA	Rpn family recombination-promoting nuclease/putative transposase
1	T_CL_1	FFX45_10350	CP040671	2104514	2105383	870	1	NA	Rpn family recombination-promoting nuclease/putative transposase
1	T_CL_1	FFX45_10355	CP040671	2105387	2106316	930	1	NA	Rpn family recombination-promoting nuclease/putative transposase
1	T_CL_1	FFX45_10360	CP040671	2106320	2107237	918	1	NA	Rpn family recombination-promoting nuclease/putative transposase
1	T_CL_1	FFX45_10365	CP040671	2107241	2108134	894	1	NA	Rpn family recombination-promoting nuclease/putative transposase
1	T_CL_1	FFX45_10370	CP040671	2108138	2109091	954	1	NA	Rpn family recombination-promoting nuclease/putative transposase
1	T_CL_1	FFX45_10375	CP040671	2109095	2110072	978	1	NA	Rpn family recombination-promoting nuclease/putative transposase
1	T_NK55	NK55_RS01355	NC_023033	271337	272374	1038	-1	NA	Rpn family recombination-promoting nuclease/putative transposase
1	T_NK55	NK55_RS04265	NC_023033	892941	894002	1062	1	NA	Rpn family recombination-promoting nuclease/putative transposase
1	Te_BP_1	tlr0674	NC_004113	690818	691747	930	1	NA	hypothetical protein
1	Te_BP_1	tlr0675	NC_004113	691755	692660	906	1	NA	hypothetical protein
1	Te_BP_1	tlr0676	NC_004113	692668	693561	894	1	NA	hypothetical protein
1	Te_BP_1	tlr0677	NC_004113	693569	694522	954	1	NA	hypothetical protein
1	Te_BP_1	tlr1500	NC_004113	1568244	1569089	846	1	NA	hypothetical protein
1	Te_BP_1	tlr1501	NC_004113	1569097	1570038	942	1	NA	hypothetical protein
1	Te_PKUAC_SCTE542	D3A95_01810	CP032152	363098	363979	882	-1	NA	Rpn family recombination-promoting nuclease/putative transposase
1	Te_PKUAC_SCTE542	D3A95_01815	CP032152	363983	364828	846	-1	NA	Rpn family recombination-promoting nuclease/putative transposase
1	Tv_NIES_2134	CDC40_RS02805	NZ_AP018202	564450	565463	1014	-1	NA	Rpn family recombination-promoting nuclease/putative transposase
1	Tv_NIES_2134	CDC40_RS02810	NZ_AP018202	565471	566400	930	-1	NA	Rpn family recombination-promoting nuclease/putative transposase
1	Tv_NIES_2134	CDC40_RS02815	NZ_AP018202	566408	567289	882	-1	NA	Rpn family recombination-promoting nuclease/putative transposase
1	Tv_NIES_2134	CDC40_RS02825	NZ_AP018202	568166	569023	858	-1	NA	Rpn family recombination-promoting nuclease/putative transposase
1	Tv_NIES_2134	CDC40_RS02835	NZ_AP018202	569955	570872	918	-1	NA	Rpn family recombination-promoting nuclease/putative transposase
1	Tv_NIES_2134	CDC40_RS06995	NZ_AP018202	1440769	1441710	942	-1	NA	Rpn family recombination-promoting nuclease/putative transposase
1	Tv_NIES_2134	CDC40_RS07000	NZ_AP018202	1441718	1442563	846	-1	NA	Rpn family recombination-promoting nuclease/putative transposase
2	Te_BP_1	tlr0257	NC_004113	241585	242763	1179	1	NA	transposase
2	Te_BP_1	tlr0401	NC_004113	397671	398849	1179	1	NA	transposase
2	Te_BP_1	tlr1113	NC_004113	1143668	1144846	1179	1	NA	transposase
2	Te_BP_1	tlr1142	NC_004113	1172925	1174103	1179	1	NA	transposase
2	Te_BP_1	tlr1176	NC_004113	1211768	1212946	1179	1	NA	transposase
2	Te_BP_1	tlr1380	NC_004113	1447751	1448929	1179	1	NA	transposase
2	Te_BP_1	tlr2032	NC_004113	2114060	2115238	1179	1	NA	transposase
2	Te_BP_1	tlr2238	NC_004113	2320881	2322059	1179	1	NA	transposase
2	Te_BP_1	tlr2322	NC_004113	2412267	2413445	1179	1	NA	transposase
2	Te_BP_1	tlr2399	NC_004113	2512479	2513657	1179	1	NA	transposase
2	Tv_NIES_2134	CDC40_RS02200	NZ_AP018202	447096	448274	1179	-1	NA	IS200/IS605 family element transposase accessory protein TnpB
2	Tv_NIES_2134	CDC40_RS02730	NZ_AP018202	544584	545762	1179	1	NA	IS200/IS605 family element transposase accessory protein TnpB
2	Tv_NIES_2134	CDC40_RS02910	NZ_AP018202	585302	586480	1179	-1	NA	IS200/IS605 family element transposase accessory protein TnpB
2	Tv_NIES_2134	CDC40_RS03155	NZ_AP018202	639116	640294	1179	-1	NA	IS200/IS605 family element transposase accessory protein TnpB
2	Tv_NIES_2134	CDC40_RS03765	NZ_AP018202	761392	762570	1179	-1	NA	IS200/IS605 family element transposase accessory protein TnpB
2	Tv_NIES_2134	CDC40_RS06500	NZ_AP018202	1324793	1325971	1179	1	NA	IS200/IS605 family element transposase accessory protein TnpB
2	Tv_NIES_2134	CDC40_RS09965	NZ_AP018202	2043853	2045031	1179	-1	NA	IS200/IS605 family element transposase accessory protein TnpB
2	Tv_NIES_2134	CDC40_RS10035	NZ_AP018202	2055992	2057170	1179	-1	NA	IS200/IS605 family element transposase accessory protein TnpB
2	Tv_NIES_2134	CDC40_RS10425	NZ_AP018202	2126120	2127298	1179	-1	NA	IS200/IS605 family element transposase accessory protein TnpB
2	Tv_NIES_2134	CDC40_RS10605	NZ_AP018202	2163845	2165023	1179	-1	NA	IS200/IS605 family element transposase accessory protein TnpB
2	Tv_NIES_2134	CDC40_RS10755	NZ_AP018202	2190637	2191815	1179	1	NA	IS200/IS605 family element transposase accessory protein TnpB
2	Tv_NIES_2134	CDC40_RS11225	NZ_AP018202	2281232	2282410	1179	1	NA	IS200/IS605 family element transposase accessory protein TnpB
2	Tv_NIES_2134	CDC40_RS11425	NZ_AP018202	2319481	2320659	1179	1	NA	IS200/IS605 family element transposase accessory protein TnpB
3	Sl_PCC6715	BRW62_RS08215	NZ_CP018092	1630625	1632553	1929	1	NA	ATP-dependent zinc metalloprotease FtsH
3	Sl_PCC6715	BRW62_RS09180	NZ_CP018092	1851423	1853261	1839	1	NA	ATP-dependent metallopeptidase FtsH/Yme1/Tma family protein
3	Sl_PCC6715	BRW62_RS11815	NZ_CP018092	2426050	2427906	1857	1	NA	ATP-dependent metallopeptidase FtsH/Yme1/Tma family protein
3	T_CL_1	FFX45_00920	CP040671	186201	188060	1860	-1	NA	ATP-dependent metallopeptidase FtsH/Yme1/Tma family protein
3	T_CL_1	FFX45_07675	CP040671	1523659	1525497	1839	1	NA	ATP-dependent metallopeptidase FtsH/Yme1/Tma family protein
3	T_CL_1	FFX45_08250	CP040671	1648802	1650736	1935	-1	hflB	ATP-dependent zinc metalloprotease FtsH
3	T_CL_1	FFX45_12110	CP040671	2461342	2463237	1896	-1	hflB	ATP-dependent zinc metalloprotease FtsH
3	T_NK55	NK55_RS05960	NC_023033	1232215	1234143	1929	-1	NA	ATP-dependent zinc metalloprotease FtsH
3	T_NK55	NK55_RS10060	NC_023033	2055421	2057259	1839	-1	NA	ATP-dependent metallopeptidase FtsH/Yme1/Tma family protein
3	T_NK55	NK55_RS11845	NC_023033	2440321	2442180	1860	1	NA	ATP-dependent metallopeptidase FtsH/Yme1/Tma family protein
3	Te_BP_1	tll0131	NC_004113	110890	112728	1839	-1	ftsH	cell division protein
3	Te_BP_1	tll0734	NC_004113	755093	756988	1896	-1	ftsH	cell division protein
3	Te_BP_1	tll1832	NC_004113	1913906	1915840	1935	-1	ftsH	cell division protein
3	Te_BP_1	tlr0528	NC_004113	527625	529484	1860	1	ftsH	cell division protein
3	Te_PKUAC_SCTE542	D3A95_04770	CP032152	965880	967739	1860	1	NA	ATP-dependent metallopeptidase FtsH/Yme1/Tma family protein
3	Te_PKUAC_SCTE542	D3A95_11615	CP032152	2343816	2345711	1896	-1	hflB	ATP-dependent zinc metalloprotease FtsH
3	Tv_NIES_2134	CDC40_RS03965	NZ_AP018202	804664	806523	1860	1	NA	ATP-dependent metallopeptidase FtsH/Yme1/Tma family protein
3	Tv_NIES_2134	CDC40_RS08700	NZ_AP018202	1792419	1794353	1935	-1	hflB	ATP-dependent zinc metalloprotease FtsH
3	Tv_NIES_2134	CDC40_RS11660	NZ_AP018202	2368560	2370455	1896	1	hflB	ATP-dependent zinc metalloprotease FtsH
3	Tv_NIES_2134	CDC40_RS11960	NZ_AP018202	2436100	2437938	1839	1	NA	ATP-dependent metallopeptidase FtsH/Yme1/Tma family protein
4	Sl_PCC6715	BRW62_RS07685	NZ_CP018092	1528952	1529674	723	1	NA	DUF1997 domain-containing protein
4	T_NK55	NK55_RS06470	NC_023033	1352863	1353561	699	-1	NA	DUF1997 domain-containing protein
4	Te_BP_1	tll0382	NC_004113	381495	382487	993	-1	NA	transposase
4	Te_BP_1	tll0475	NC_004113	471279	472316	1038	-1	NA	transposase
4	Te_BP_1	tll0566	NC_004113	563288	564325	1038	-1	NA	transposase
4	Te_BP_1	tll0721	NC_004113	742517	743557	1041	-1	NA	transposase
4	Te_BP_1	tll0929	NC_004113	951826	952863	1038	-1	NA	transposase
4	Te_BP_1	tll1486	NC_004113	1551216	1552655	1440	-1	NA	transposase
4	Te_BP_1	tll1635	NC_004113	1709430	1710467	1038	-1	NA	transposase
4	Te_BP_1	tll1929	NC_004113	2019395	2021053	1659	-1	NA	transposase
4	Te_BP_1	tll2137	NC_004113	2220492	2221544	1053	-1	NA	transposase
4	Te_BP_1	tlr0215	NC_004113	197131	198168	1038	1	NA	transposase
4	Te_BP_1	tlr1017	NC_004113	1043098	1044135	1038	1	NA	transposase
4	Te_BP_1	tlr1115	NC_004113	1145361	1146398	1038	1	NA	transposase
4	Te_BP_1	tlr1353	NC_004113	1412047	1413156	1110	1	NA	transposase
4	Te_BP_1	tlr1580	NC_004113	1642391	1643428	1038	1	NA	transposase
4	Tv_NIES_2134	CDC40_RS01410	NZ_AP018202	285366	286349	984	1	NA	DDE-type integrase/transposase/recombinase
4	Tv_NIES_2134	CDC40_RS11585	NZ_AP018202	2352045	2352977	933	1	NA	DDE-type integrase/transposase/recombinase
5	Sl_PCC6715	BRW62_RS03345	NZ_CP018092	657348	658430	1083	-1	psbA	photosystem II q(b) protein
5	Sl_PCC6715	BRW62_RS07095	NZ_CP018092	1402223	1403305	1083	-1	psbA	photosystem II q(b) protein
5	T_CL_1	FFX45_08385	CP040671	1677615	1678697	1083	1	psbA	photosystem II q(b) protein
5	T_CL_1	FFX45_08390	CP040671	1679010	1680092	1083	1	psbA	photosystem II q(b) protein
5	T_CL_1	FFX45_10905	CP040671	2212044	2213126	1083	1	psbA	photosystem II q(b) protein
5	T_NK55	NK55_RS02875	NC_023033	592368	593450	1083	1	NA	photosystem II q(b) protein
5	T_NK55	NK55_RS06020	NC_023033	1243496	1244578	1083	1	NA	photosystem II q(b) protein
5	T_NK55	NK55_RS06025	NC_023033	1244890	1245972	1083	1	NA	photosystem II q(b) protein
5	Te_BP_1	tlr1477	NC_004113	1539595	1540677	1083	1	psbA3	photosystem II D1 protein
5	Te_BP_1	tlr1843	NC_004113	1925155	1926237	1083	1	psbA1	photosystem II D1 protein
5	Te_BP_1	tlr1844	NC_004113	1926550	1927632	1083	1	psbA2	photosystem II D1 protein
5	Te_PKUAC_SCTE542	D3A95_01255	CP032152	257094	258176	1083	-1	psbA	photosystem II q(b) protein
5	Te_PKUAC_SCTE542	D3A95_10830	CP032152	2184427	2185509	1083	-1	psbA	photosystem II q(b) protein
5	Te_PKUAC_SCTE542	D3A95_10845	CP032152	2187331	2188413	1083	-1	psbA	photosystem II q(b) protein
5	Tv_NIES_2134	CDC40_RS00880	NZ_AP018202	180796	181878	1083	-1	psbA	photosystem II q(b) protein
5	Tv_NIES_2134	CDC40_RS08760	NZ_AP018202	1803664	1804746	1083	1	psbA	photosystem II q(b) protein
5	Tv_NIES_2134	CDC40_RS08765	NZ_AP018202	1805052	1806134	1083	1	psbA	photosystem II q(b) protein
6	Sl_PCC6715	BRW62_RS00880	NZ_CP018092	167225	167620	396	1	NA	IS200/IS605 family transposase
6	Sl_PCC6715	BRW62_RS01620	NZ_CP018092	313897	314292	396	-1	NA	IS200/IS605 family transposase
6	Sl_PCC6715	BRW62_RS01980	NZ_CP018092	387510	387917	408	-1	NA	IS200/IS605 family transposase
6	Sl_PCC6715	BRW62_RS02250	NZ_CP018092	435959	436408	450	1	NA	IS200/IS605 family transposase
6	Sl_PCC6715	BRW62_RS07220	NZ_CP018092	1427192	1427599	408	-1	NA	IS200/IS605 family transposase
6	Sl_PCC6715	BRW62_RS07295	NZ_CP018092	1443894	1444349	456	1	NA	IS200/IS605 family transposase
6	Sl_PCC6715	BRW62_RS09085	NZ_CP018092	1831136	1831264	129	-1	NA	hypothetical protein
6	Sl_PCC6715	BRW62_RS11540	NZ_CP018092	2376679	2377134	456	1	NA	IS200/IS605 family transposase
6	Sl_PCC6715	BRW62_RS12825	NZ_CP018092	2631436	2631615	180	-1	NA	IS200/IS605 family transposase
6	Sl_PCC6715	BRW62_RS12915	NZ_CP018092	2644468	2644872	405	-1	NA	IS200/IS605 family transposase
6	Te_BP_1	tll1379	NC_004113	1447301	1447699	399	-1	NA	transposase
6	Te_BP_1	tll2237	NC_004113	2320431	2320829	399	-1	NA	transposase
6	Te_PKUAC_SCTE542	D3A95_02605	CP032152	535618	536031	414	-1	tnpA	IS200/IS605 family transposase
6	Tv_NIES_2134	CDC40_RS02205	NZ_AP018202	448326	448718	393	1	tnpA	IS200/IS605 family transposase
6	Tv_NIES_2134	CDC40_RS10430	NZ_AP018202	2127350	2127748	399	1	tnpA	IS200/IS605 family transposase
7	Sl_PCC6715	BRW62_RS01080	NZ_CP018092	206032	207957	1926	1	NA	molecular chaperone DnaK
7	Sl_PCC6715	BRW62_RS02915	NZ_CP018092	575874	577742	1869	1	NA	molecular chaperone DnaK
7	T_CL_1	FFX45_02075	CP040671	409539	411494	1956	1	dnaK	molecular chaperone DnaK
7	T_CL_1	FFX45_04150	CP040671	806957	809002	2046	-1	dnaK	molecular chaperone DnaK
7	T_CL_1	FFX45_07175	CP040671	1424877	1426799	1923	1	dnaK	molecular chaperone DnaK
7	T_NK55	NK55_RS05430	NC_023033	1128529	1130451	1923	1	NA	molecular chaperone DnaK
7	T_NK55	NK55_RS07530	NC_023033	1545913	1547937	2025	-1	NA	molecular chaperone DnaK
7	T_NK55	NK55_RS10665	NC_023033	2202109	2204064	1956	-1	NA	molecular chaperone DnaK
7	Te_BP_1	tll0791	NC_004113	821140	823095	1956	-1	dnaK	molecular chaperone DnaK
7	Te_BP_1	tll2150	NC_004113	2230385	2232427	2043	-1	dnaK	molecular chaperone DnaK
7	Te_BP_1	tlr1733	NC_004113	1813361	1815283	1923	1	dnaK	molecular chaperone DnaK
7	Te_PKUAC_SCTE542	D3A95_07120	CP032152	1429295	1431340	2046	-1	dnaK	molecular chaperone DnaK
7	Tv_NIES_2134	CDC40_RS01205	NZ_AP018202	236411	238366	1956	1	dnaK	molecular chaperone DnaK
7	Tv_NIES_2134	CDC40_RS08185	NZ_AP018202	1688109	1690031	1923	1	dnaK	molecular chaperone DnaK
7	Tv_NIES_2134	CDC40_RS10305	NZ_AP018202	2099396	2101438	2043	-1	dnaK	molecular chaperone DnaK
8	Sl_PCC6715	BRW62_RS07215	NZ_CP018092	1424339	1426963	2625	-1	clpB	ATP-dependent chaperone ClpB
8	T_CL_1	FFX45_00560	CP040671	117497	119971	2475	1	NA	ATP-dependent Clp protease ATP-binding subunit
8	T_CL_1	FFX45_06445	CP040671	1267869	1270532	2664	1	clpB	ATP-dependent chaperone ClpB
8	T_CL_1	FFX45_09135	CP040671	1843919	1846534	2616	-1	clpB	ATP-dependent chaperone ClpB
8	T_NK55	NK55_RS00510	NC_023033	107940	110414	2475	1	NA	ATP-dependent Clp protease ATP-binding subunit
8	T_NK55	NK55_RS02430	NC_023033	506244	508859	2616	1	NA	ATP-dependent chaperone ClpB
8	T_NK55	NK55_RS09230	NC_023033	1903942	1906605	2664	-1	NA	ATP-dependent chaperone ClpB
8	Te_BP_1	tll0307	NC_004113	290720	293194	2475	-1	clpC	ATP-dependent Clp protease regulatory subunit
8	Te_BP_1	tll2453	NC_004113	2565805	2568468	2664	-1	clpB	endopeptidase Clp ATP-binding subunit B
8	Te_BP_1	tlr1389	NC_004113	1454032	1456647	2616	1	NA	ClpB protein
8	Te_PKUAC_SCTE542	D3A95_05815	CP032152	1186206	1188680	2475	1	NA	ATP-dependent Clp protease ATP-binding subunit
8	Te_PKUAC_SCTE542	D3A95_09125	CP032152	1840839	1843502	2664	-1	clpB	ATP-dependent chaperone ClpB
8	Tv_NIES_2134	CDC40_RS01940	NZ_AP018202	397777	400251	2475	1	NA	ATP-dependent Clp protease ATP-binding subunit
8	Tv_NIES_2134	CDC40_RS05765	NZ_AP018202	1167333	1169948	2616	-1	clpB	ATP-dependent chaperone ClpB
8	Tv_NIES_2134	CDC40_RS12525	NZ_AP018202	2543218	2545881	2664	-1	clpB	ATP-dependent chaperone ClpB
9	Te_BP_1	tll0240	NC_004113	222900	223376	477	-1	NA	transposase
9	Te_BP_1	tll0442	NC_004113	440684	441160	477	-1	NA	transposase
9	Te_BP_1	tll0545	NC_004113	546298	546774	477	-1	NA	transposase
9	Te_BP_1	tll1245	NC_004113	1290653	1291129	477	-1	NA	transposase
9	Te_BP_1	tlr0752	NC_004113	778510	778986	477	1	NA	transposase
9	Te_BP_1	tlr0774	NC_004113	804008	804484	477	1	NA	transposase
9	Te_BP_1	tlr0999	NC_004113	1024580	1025056	477	1	NA	transposase
9	Te_BP_1	tlr1931	NC_004113	2022163	2022639	477	1	NA	transposase
9	Tv_NIES_2134	CDC40_RS01430	NZ_AP018202	288952	289718	767	1	NA	IS5 family transposase
9	Tv_NIES_2134	CDC40_RS03100	NZ_AP018202	629798	630564	767	1	NA	IS5 family transposase
9	Tv_NIES_2134	CDC40_RS03900	NZ_AP018202	790563	791329	767	1	NA	IS5 family transposase
9	Tv_NIES_2134	CDC40_RS05815	NZ_AP018202	1175534	1176300	767	1	NA	IS5 family transposase
9	Tv_NIES_2134	CDC40_RS06020	NZ_AP018202	1226628	1227394	767	-1	NA	IS5 family transposase
9	Tv_NIES_2134	CDC40_RS06865	NZ_AP018202	1412190	1412956	767	-1	NA	IS5 family transposase
9	Tv_NIES_2134	CDC40_RS10525	NZ_AP018202	2148501	2149267	767	-1	NA	IS5 family transposase
10	Sl_PCC6715	BRW62_RS00835	NZ_CP018092	156417	157706	1290	-1	NA	IS200/IS605 family element transposase accessory protein TnpB
10	Sl_PCC6715	BRW62_RS00875	NZ_CP018092	165878	167167	1290	-1	NA	IS200/IS605 family element transposase accessory protein TnpB
10	Sl_PCC6715	BRW62_RS01625	NZ_CP018092	314350	315639	1290	1	NA	IS200/IS605 family element transposase accessory protein TnpB
10	Sl_PCC6715	BRW62_RS02055	NZ_CP018092	400275	401564	1290	-1	NA	IS200/IS605 family element transposase accessory protein TnpB
10	Sl_PCC6715	BRW62_RS02245	NZ_CP018092	434622	435926	1305	-1	NA	IS200/IS605 family element transposase accessory protein TnpB
10	Sl_PCC6715	BRW62_RS02590	NZ_CP018092	515490	516779	1290	-1	NA	IS200/IS605 family element transposase accessory protein TnpB
10	Sl_PCC6715	BRW62_RS02905	NZ_CP018092	573486	574775	1290	-1	NA	IS200/IS605 family element transposase accessory protein TnpB
10	Sl_PCC6715	BRW62_RS03645	NZ_CP018092	722303	723592	1290	-1	NA	IS200/IS605 family element transposase accessory protein TnpB
10	Sl_PCC6715	BRW62_RS07290	NZ_CP018092	1443556	1443864	309	-1	NA	hypothetical protein
10	Sl_PCC6715	BRW62_RS07985	NZ_CP018092	1587653	1588885	1233	-1	NA	IS200/IS605 family element transposase accessory protein TnpB
10	Sl_PCC6715	BRW62_RS08355	NZ_CP018092	1660816	1662105	1290	-1	NA	IS200/IS605 family element transposase accessory protein TnpB
10	Sl_PCC6715	BRW62_RS11535	NZ_CP018092	2376017	2376649	633	-1	NA	hypothetical protein
10	Sl_PCC6715	BRW62_RS12920	NZ_CP018092	2644919	2646151	1233	1	NA	IS200/IS605 family element transposase accessory protein TnpB
11	Sl_PCC6715	BRW62_RS00695	NZ_CP018092	127538	128707	1170	1	NA	IS200/IS605 family element transposase accessory protein TnpB
11	Sl_PCC6715	BRW62_RS03145	NZ_CP018092	622995	624152	1158	-1	NA	IS200/IS605 family element transposase accessory protein TnpB
11	Sl_PCC6715	BRW62_RS05030	NZ_CP018092	1001386	1002555	1170	-1	NA	IS200/IS605 family element transposase accessory protein TnpB
11	Sl_PCC6715	BRW62_RS06120	NZ_CP018092	1215908	1217077	1170	-1	NA	IS200/IS605 family element transposase accessory protein TnpB
11	Sl_PCC6715	BRW62_RS06390	NZ_CP018092	1273037	1274194	1158	1	NA	IS200/IS605 family element transposase accessory protein TnpB
11	Sl_PCC6715	BRW62_RS07270	NZ_CP018092	1438452	1439609	1158	-1	NA	IS200/IS605 family element transposase accessory protein TnpB
11	Sl_PCC6715	BRW62_RS08280	NZ_CP018092	1645455	1646612	1158	1	NA	IS200/IS605 family element transposase accessory protein TnpB
11	Sl_PCC6715	BRW62_RS10225	NZ_CP018092	2097465	2098634	1170	1	NA	IS200/IS605 family element transposase accessory protein TnpB
11	Sl_PCC6715	BRW62_RS12125	NZ_CP018092	2491937	2493106	1170	-1	NA	IS200/IS605 family element transposase accessory protein TnpB
11	Sl_PCC6715	BRW62_RS12450	NZ_CP018092	2555343	2556512	1170	-1	NA	IS200/IS605 family element transposase accessory protein TnpB
11	Sl_PCC6715	BRW62_RS12550	NZ_CP018092	2578145	2579314	1170	-1	NA	IS200/IS605 family element transposase accessory protein TnpB
11	Sl_PCC6715	BRW62_RS12750	NZ_CP018092	2616633	2617802	1170	1	NA	IS200/IS605 family element transposase accessory protein TnpB
12	Sl_PCC6715	BRW62_RS02355	NZ_CP018092	456524	459115	2592	1	NA	glycogen/starch/alpha-glucan phosphorylase
12	Sl_PCC6715	BRW62_RS10900	NZ_CP018092	2237418	2239934	2517	1	NA	glycogen/starch/alpha-glucan phosphorylase
12	T_CL_1	FFX45_02120	CP040671	418543	421143	2601	-1	NA	glycogen/starch/alpha-glucan phosphorylase
12	T_CL_1	FFX45_05285	CP040671	1029682	1032210	2529	-1	NA	glycogen/starch/alpha-glucan phosphorylase
12	T_NK55	NK55_RS08550	NC_023033	1751815	1754346	2532	-1	NA	glycogen/starch/alpha-glucan phosphorylase
12	T_NK55	NK55_RS10620	NC_023033	2192462	2195047	2586	1	NA	glycogen/starch/alpha-glucan phosphorylase
12	Te_BP_1	tll2079	NC_004113	2158576	2161104	2529	-1	NA	glycogen phosphorylase
12	Te_BP_1	tlr0782	NC_004113	811485	814085	2601	1	NA	glycogen phosphorylase
12	Te_PKUAC_SCTE542	D3A95_03575	CP032152	728970	731570	2601	1	NA	glycogen/starch/alpha-glucan phosphorylase
12	Te_PKUAC_SCTE542	D3A95_08245	CP032152	1660090	1662618	2529	1	NA	glycogen/starch/alpha-glucan phosphorylase
12	Tv_NIES_2134	CDC40_RS01250	NZ_AP018202	245419	248019	2601	-1	NA	glycogen/starch/alpha-glucan phosphorylase
12	Tv_NIES_2134	CDC40_RS11475	NZ_AP018202	2327300	2329828	2529	-1	NA	glycogen/starch/alpha-glucan phosphorylase
13	Sl_PCC6715	BRW62_RS04830	NZ_CP018092	961220	962800	1581	1	NA	NADH-quinone oxidoreductase subunit M
13	Sl_PCC6715	BRW62_RS12595	NZ_CP018092	2584537	2586138	1602	1	NA	NADH-quinone oxidoreductase subunit M
13	T_CL_1	FFX45_08165	CP040671	1631634	1633235	1602	1	NA	NAD(P)H-quinone oxidoreductase subunit 4
13	T_CL_1	FFX45_12045	CP040671	2445697	2447280	1584	-1	NA	NAD(P)H-quinone oxidoreductase subunit 4
13	T_NK55	NK55_RS05895	NC_023033	1217752	1219353	1602	1	NA	NADH-quinone oxidoreductase subunit M
13	T_NK55	NK55_RS10305	NC_023033	2114705	2116312	1608	-1	NA	NADH-quinone oxidoreductase subunit M
13	Te_BP_1	tll0719	NC_004113	738808	740397	1590	-1	ndhD1	NAD(P)H-quinone oxidoreductase subunit 4
13	Te_BP_1	tlr1819	NC_004113	1899436	1901037	1602	1	ndhD2	NAD(P)H-quinone oxidoreductase subunit 4
13	Te_PKUAC_SCTE542	D3A95_10970	CP032152	2212436	2214037	1602	-1	NA	NADH-quinone oxidoreductase subunit M
13	Te_PKUAC_SCTE542	D3A95_11520	CP032152	2323686	2325269	1584	-1	NA	NADH-quinone oxidoreductase subunit M
13	Tv_NIES_2134	CDC40_RS08635	NZ_AP018202	1777949	1779550	1602	1	NA	NADH-quinone oxidoreductase subunit M
13	Tv_NIES_2134	CDC40_RS11725	NZ_AP018202	2384019	2385608	1590	1	NA	NADH-quinone oxidoreductase subunit M
14	Sl_PCC6715	BRW62_RS08340	NZ_CP018092	1656651	1658513	1863	-1	NA	porin
14	Sl_PCC6715	BRW62_RS10450	NZ_CP018092	2141804	2143621	1818	1	NA	porin
14	T_CL_1	FFX45_06560	CP040671	1288819	1290600	1782	1	NA	porin
14	T_CL_1	FFX45_07030	CP040671	1393185	1394768	1584	-1	NA	porin
14	T_NK55	NK55_RS05300	NC_023033	1101322	1102896	1575	-1	NA	porin
14	T_NK55	NK55_RS09130	NC_023033	1885926	1887698	1773	-1	NA	porin
14	Te_BP_1	tll1706	NC_004113	1785853	1787427	1575	-1	NA	porin
14	Te_BP_1	tlr2324	NC_004113	2415660	2417438	1779	1	NA	porin
14	Te_PKUAC_SCTE542	D3A95_03315	CP032152	674859	676433	1575	-1	NA	porin
14	Te_PKUAC_SCTE542	D3A95_09015	CP032152	1820632	1822485	1854	-1	NA	porin
14	Tv_NIES_2134	CDC40_RS08050	NZ_AP018202	1660610	1662190	1581	-1	NA	porin
14	Tv_NIES_2134	CDC40_RS12430	NZ_AP018202	2526507	2528324	1818	-1	NA	porin
15	Te_BP_1	tll0114	NC_004113	91446	93134	1689	-1	NA	maturase; reverse transcriptase
15	Te_BP_1	tlr0031	NC_004113	28791	30485	1695	1	NA	reverse transcriptase
15	Te_BP_1	tlr0308	NC_004113	294853	296547	1695	1	NA	reverse transcriptase
15	Te_BP_1	tlr0522	NC_004113	520930	522624	1695	1	NA	reverse transcriptase
15	Te_BP_1	tlr0620	NC_004113	625568	627256	1689	1	NA	reverse transcriptase
15	Te_BP_1	tlr1001	NC_004113	1025653	1026606	954	1	NA	reverse transcriptase
15	Te_BP_1	tlr1118	NC_004113	1149586	1150407	822	1	NA	reverse transcriptase
15	Te_BP_1	tlr1161	NC_004113	1198401	1200095	1695	1	NA	reverse transcriptase
15	Tv_NIES_2134	CDC40_RS00160	NZ_AP018202	27962	29650	1689	1	ltrA	group II intron reverse transcriptase/maturase
15	Tv_NIES_2134	CDC40_RS01930	NZ_AP018202	395263	396951	1689	-1	ltrA	group II intron reverse transcriptase/maturase
15	Tv_NIES_2134	CDC40_RS04985	NZ_AP018202	1022111	1023799	1689	-1	ltrA	group II intron reverse transcriptase/maturase
15	Tv_NIES_2134	CDC40_RS12045	NZ_AP018202	2455690	2457378	1689	1	ltrA	group II intron reverse transcriptase/maturase
16	Sl_PCC6715	BRW62_RS07360	NZ_CP018092	1457482	1459791	2310	1	psaA	photosystem I core protein PsaA
16	Sl_PCC6715	BRW62_RS07365	NZ_CP018092	1459815	1462040	2226	1	psaB	photosystem I core protein PsaB
16	T_CL_1	FFX45_12090	CP040671	2453929	2456238	2310	1	psaA	photosystem I core protein PsaA
16	T_CL_1	FFX45_12095	CP040671	2456262	2458487	2226	1	psaB	photosystem I core protein PsaB
16	T_NK55	NK55_RS10340	NC_023033	2121974	2124241	2268	1	NA	photosystem I core protein PsaA
16	T_NK55	NK55_RS10345	NC_023033	2124265	2126490	2226	1	NA	photosystem I core protein PsaB
16	Te_BP_1	tlr0731	NC_004113	748328	750637	2310	1	psaA	photosystem I P700 chlorophyll a apoprotein A1
16	Te_BP_1	tlr0732	NC_004113	750661	752886	2226	1	psaB	photosystem I P700 chlorophyll a apoprotein A2
16	Te_PKUAC_SCTE542	D3A95_11580	CP032152	2336633	2338858	2226	1	psaB	photosystem I core protein PsaB
16	Tv_NIES_2134	CDC40_RS11670	NZ_AP018202	2372659	2374884	2226	-1	psaB	photosystem I core protein PsaB
16	Tv_NIES_2134	CDC40_RS11675	NZ_AP018202	2374908	2377217	2310	-1	psaA	photosystem I core protein PsaA
17	Sl_PCC6715	BRW62_RS08715	NZ_CP018092	1745339	1747273	1935	1	NA	AarF/ABC1/UbiB kinase family protein
17	Sl_PCC6715	BRW62_RS12780	NZ_CP018092	2620364	2622067	1704	-1	NA	AarF/ABC1/UbiB kinase family protein
17	T_CL_1	FFX45_01295	CP040671	271794	273728	1935	-1	NA	AarF/ABC1/UbiB kinase family protein
17	T_CL_1	FFX45_05730	CP040671	1121634	1123343	1710	-1	NA	AarF/ABC1/UbiB kinase family protein
17	T_NK55	NK55_RS05060	NC_023033	1057277	1059043	1767	1	NA	AarF/ABC1/UbiB kinase family protein
17	T_NK55	NK55_RS11505	NC_023033	2364998	2366932	1935	-1	NA	AarF/ABC1/UbiB kinase family protein
17	Te_BP_1	tll0950	NC_004113	971548	973494	1947	-1	NA	hypothetical protein
17	Te_BP_1	tlr1660	NC_004113	1741814	1743535	1722	1	NA	hypothetical protein
17	Te_PKUAC_SCTE542	D3A95_03060	CP032152	628955	630664	1710	1	NA	AarF/ABC1/UbiB kinase family protein
17	Tv_NIES_2134	CDC40_RS04800	NZ_AP018202	982887	984833	1947	1	NA	AarF/ABC1/UbiB kinase family protein
17	Tv_NIES_2134	CDC40_RS07810	NZ_AP018202	1616575	1618296	1722	1	NA	AarF/ABC1/UbiB kinase family protein
18	Sl_PCC6715	BRW62_RS09680	NZ_CP018092	1971657	1973486	1830	1	NA	NAD(P)H-quinone oxidoreductase subunit F
18	T_CL_1	FFX45_01055	CP040671	218548	220383	1836	1	NA	NAD(P)H-quinone oxidoreductase subunit F
18	T_CL_1	FFX45_04025	CP040671	783771	785600	1830	1	NA	NAD(P)H-quinone oxidoreductase subunit F
18	T_NK55	NK55_RS07415	NC_023033	1525756	1527585	1830	1	NA	NAD(P)H-quinone oxidoreductase subunit F
18	T_NK55	NK55_RS11290	NC_023033	2316303	2318138	1836	1	NA	NAD(P)H-quinone oxidoreductase subunit F
18	Te_BP_1	tlr0904	NC_004113	920629	922464	1836	1	ndhF3	NAD(P)H-quinone oxidoreductase subunit F
18	Te_BP_1	tlr2124	NC_004113	2207052	2208881	1830	1	ndhF4	NAD(P)H-quinone oxidoreductase subunit F
18	Te_PKUAC_SCTE542	D3A95_04635	CP032152	931304	933139	1836	-1	NA	NAD(P)H-quinone oxidoreductase subunit F
18	Te_PKUAC_SCTE542	D3A95_07000	CP032152	1408891	1410720	1830	1	NA	NAD(P)H-quinone oxidoreductase subunit F
18	Tv_NIES_2134	CDC40_RS05040	NZ_AP018202	1036500	1038335	1836	-1	NA	NAD(P)H-quinone oxidoreductase subunit F
18	Tv_NIES_2134	CDC40_RS10175	NZ_AP018202	2076410	2078239	1830	1	NA	NAD(P)H-quinone oxidoreductase subunit F
19	Sl_PCC6715	BRW62_RS10940	NZ_CP018092	2248058	2253313	5256	-1	NA	CHAT domain-containing protein
19	Sl_PCC6715	BRW62_RS12870	NZ_CP018092	2636758	2638599	1842	-1	NA	CHAT domain-containing protein
19	T_CL_1	FFX45_02690	CP040671	524631	529574	4944	1	NA	CHAT domain-containing protein
19	T_CL_1	FFX45_05810	CP040671	1141500	1145762	4263	-1	NA	CHAT domain-containing protein
19	T_NK55	NK55_RS04985	NC_023033	1040694	1042301	1608	1	NA	CHAT domain-containing protein
19	T_NK55	NK55_RS09735	NC_023033	2007682	2009538	1857	-1	NA	filamentous hemagglutinin N-terminal domain-containing protein
19	T_NK55	NK55_RS12510	NC_023033	2004656	2007592	2937	-1	NA	CHAT domain-containing protein
19	Te_BP_1	tlr1645	NC_004113	1722527	1726795	4269	1	NA	hypothetical protein
19	Te_PKUAC_SCTE542	D3A95_02980	CP032152	606879	611126	4248	1	NA	CHAT domain-containing protein
19	Te_PKUAC_SCTE542	D3A95_09630	CP032152	1936963	1938177	1215	-1	NA	CHAT domain-containing protein
19	Tv_NIES_2134	CDC40_RS07735	NZ_AP018202	1597292	1601560	4269	1	NA	CHAT domain-containing protein
20	Sl_PCC6715	BRW62_RS02700	NZ_CP018092	541987	543615	1629	-1	groL	chaperonin GroEL
20	Sl_PCC6715	BRW62_RS07980	NZ_CP018092	1585840	1587477	1638	1	groL	chaperonin GroEL
20	T_CL_1	FFX45_08650	CP040671	1754240	1755877	1638	-1	groL	chaperonin GroEL
20	T_CL_1	FFX45_08915	CP040671	1799689	1801320	1632	-1	groL	chaperonin GroEL
20	T_NK55	NK55_RS01120	NC_023033	225706	227343	1638	1	NA	chaperonin GroEL
20	T_NK55	NK55_RS02545	NC_023033	529937	531568	1632	1	NA	chaperonin GroEL
20	Te_BP_1	tll0185	NC_004113	166487	168124	1638	-1	groEL	molecular chaperone GroEL
20	Te_BP_1	tlr1412	NC_004113	1478363	1479994	1632	1	groEL2	chaperonin 2
20	Tv_NIES_2134	CDC40_RS02355	NZ_AP018202	474625	476262	1638	-1	groL	chaperonin GroEL
20	Tv_NIES_2134	CDC40_RS05645	NZ_AP018202	1144008	1145639	1632	-1	groL	chaperonin GroEL
21	Sl_PCC6715	BRW62_RS05910	NZ_CP018092	1172614	1174278	1665	1	NA	porin
21	Sl_PCC6715	BRW62_RS11110	NZ_CP018092	2285627	2287480	1854	-1	NA	porin
21	T_CL_1	FFX45_07745	CP040671	1541980	1543569	1590	1	NA	porin
21	T_CL_1	FFX45_12820	CP040671	2608026	2609807	1782	-1	NA	porin
21	T_NK55	NK55_RS04150	NC_023033	863200	864801	1602	1	NA	porin
21	T_NK55	NK55_RS12045	NC_023033	2483944	2485716	1773	-1	NA	porin
21	Te_BP_1	tll0573	NC_004113	573844	575634	1791	-1	NA	porin
21	Te_BP_1	tlr1246	NC_004113	1291315	1292898	1584	1	NA	porin
21	Te_PKUAC_SCTE542	D3A95_05055	CP032152	1024775	1026622	1848	-1	NA	porin
21	Tv_NIES_2134	CDC40_RS04170	NZ_AP018202	844143	845912	1770	-1	NA	porin
22	Sl_PCC6715	BRW62_RS05995	NZ_CP018092	1188881	1191310	2430	-1	NA	DNA topoisomerase 4 subunit A
22	Sl_PCC6715	BRW62_RS08680	NZ_CP018092	1735567	1738134	2568	-1	NA	DNA gyrase subunit A
22	T_CL_1	FFX45_08535	CP040671	1720935	1723376	2442	-1	NA	DNA topoisomerase 4 subunit A
22	T_CL_1	FFX45_09220	CP040671	1861331	1863892	2562	-1	gyrA	DNA gyrase subunit A
22	T_NK55	NK55_RS02345	NC_023033	489087	491648	2562	1	NA	DNA gyrase subunit A
22	T_NK55	NK55_RS04750	NC_023033	986577	989012	2436	1	NA	DNA topoisomerase 4 subunit A
22	Te_BP_1	tll1617	NC_004113	1686495	1688894	2400	-1	gyrA	DNA gyrase subunit A
22	Te_BP_1	tlr1369	NC_004113	1433905	1436466	2562	1	gyrA	DNA gyrase subunit A
22	Tv_NIES_2134	CDC40_RS05865	NZ_AP018202	1186679	1189240	2562	-1	gyrA	DNA gyrase subunit A
22	Tv_NIES_2134	CDC40_RS07510	NZ_AP018202	1540320	1542719	2400	1	NA	DNA topoisomerase 4 subunit A
23	Sl_PCC6715	BRW62_RS08070	NZ_CP018092	1604006	1605064	1059	-1	psbD	photosystem II D2 protein (photosystem q(a) protein)
23	Sl_PCC6715	BRW62_RS11760	NZ_CP018092	2414412	2415470	1059	-1	psbD	photosystem II D2 protein (photosystem q(a) protein)
23	T_CL_1	FFX45_03830	CP040671	752396	753454	1059	1	psbD	photosystem II D2 protein (photosystem q(a) protein)
23	T_CL_1	FFX45_08605	CP040671	1739368	1740426	1059	1	psbD	photosystem II D2 protein (photosystem q(a) protein)
23	T_NK55	NK55_RS04680	NC_023033	969435	970493	1059	-1	NA	photosystem II D2 protein (photosystem q(a) protein)
23	T_NK55	NK55_RS07235	NC_023033	1494565	1495623	1059	1	NA	photosystem II D2 protein (photosystem q(a) protein)
23	Te_BP_1	tlr0455	NC_004113	456131	457189	1059	1	psbD2	photosystem II reaction center D2 protein
23	Te_BP_1	tlr1630	NC_004113	1702500	1703558	1059	1	psbD1	photosystem II reaction center D2 protein
23	Tv_NIES_2134	CDC40_RS07445	NZ_AP018202	1525656	1526714	1059	-1	psbD	photosystem II D2 protein (photosystem q(a) protein)
23	Tv_NIES_2134	CDC40_RS09960	NZ_AP018202	2042718	2043776	1059	1	psbD	photosystem II D2 protein (photosystem q(a) protein)
24	Sl_PCC6715	BRW62_RS08865	NZ_CP018092	1778629	1781121	2493	1	NA	EAL domain-containing protein
24	Sl_PCC6715	BRW62_RS10110	NZ_CP018092	2073719	2075857	2139	-1	NA	phosphodiesterase
24	T_CL_1	FFX45_05970	CP040671	1175330	1177468	2139	-1	NA	EAL domain-containing protein
24	T_CL_1	FFX45_11625	CP040671	2365267	2367795	2529	1	NA	EAL domain-containing protein
24	T_NK55	NK55_RS01580	NC_023033	325162	327699	2538	1	NA	EAL domain-containing protein
24	T_NK55	NK55_RS06090	NC_023033	1263825	1265963	2139	-1	NA	phosphodiesterase
24	Te_BP_1	tll0627	NC_004113	633546	636083	2538	-1	NA	hypothetical protein
24	Te_BP_1	tll1859	NC_004113	1945517	1947655	2139	-1	NA	hypothetical protein
24	Te_PKUAC_SCTE542	D3A95_06200	CP032152	1264037	1266175	2139	1	NA	bifunctional diguanylate cyclase/phosphodiesterase
24	Tv_NIES_2134	CDC40_RS08845	NZ_AP018202	1824020	1826158	2139	-1	NA	phosphodiesterase
25	Sl_PCC6715	BRW62_RS11385	NZ_CP018092	2343046	2344119	1074	-1	NA	potassium channel protein
25	Sl_PCC6715	BRW62_RS11390	NZ_CP018092	2344137	2345864	1728	-1	NA	succinate dehydrogenase/fumarate reductase flavoprotein subunit
25	T_CL_1	FFX45_09180	CP040671	1851598	1852647	1050	-1	NA	potassium channel protein
25	T_CL_1	FFX45_09185	CP040671	1852652	1854397	1746	-1	NA	succinate dehydrogenase/fumarate reductase flavoprotein subunit
25	T_NK55	NK55_RS02380	NC_023033	498365	500095	1731	1	NA	succinate dehydrogenase/fumarate reductase flavoprotein subunit
25	T_NK55	NK55_RS02385	NC_023033	500100	501149	1050	1	NA	potassium channel protein
25	Te_BP_1	tlr1377	NC_004113	1444472	1446217	1746	1	sdhA	succinate dehydrogenase flavoprotein subunit
25	Te_BP_1	tlr1378	NC_004113	1446221	1447270	1050	1	NA	potassium channel protein
25	Te_PKUAC_SCTE542	D3A95_12760	CP032152	2587405	2590203	2799	1	NA	succinate dehydrogenase/fumarate reductase flavoprotein subunit
25	Tv_NIES_2134	CDC40_RS05825	NZ_AP018202	1176932	1178677	1746	-1	NA	succinate dehydrogenase/fumarate reductase flavoprotein subunit
26	Sl_PCC6715	BRW62_RS01670	NZ_CP018092	323758	326739	2982	-1	NA	FHA domain-containing protein
26	T_CL_1	FFX45_11290	CP040671	2289050	2292130	3081	1	NA	FHA domain-containing protein
26	T_NK55	NK55_RS03145	NC_023033	642895	645984	3090	1	NA	FHA domain-containing protein
26	T_NK55	NK55_RS03200	NC_023033	656542	659523	2982	1	NA	FHA domain-containing protein
26	Te_BP_1	tll1329	NC_004113	1381953	1384982	3030	-1	NA	ABC transporter ATP-binding protein
26	Te_BP_1	tll1340	NC_004113	1395483	1398572	3090	-1	NA	ABC transporter ATP-binding protein
26	Te_PKUAC_SCTE542	D3A95_11550	CP032152	2330109	2331431	1323	1	NA	ATP-binding cassette domain-containing protein
26	Tv_NIES_2134	CDC40_RS06015	NZ_AP018202	1223496	1226585	3090	1	NA	FHA domain-containing protein
26	Tv_NIES_2134	CDC40_RS06075	NZ_AP018202	1237930	1240959	3030	1	NA	FHA domain-containing protein
27	Sl_PCC6715	BRW62_RS07125	NZ_CP018092	1408190	1408636	447	-1	NA	DUF29 domain-containing protein
27	Sl_PCC6715	BRW62_RS07130	NZ_CP018092	1408653	1409102	450	-1	NA	DUF29 domain-containing protein
27	T_CL_1	FFX45_04000	CP040671	780190	780642	453	1	NA	DUF29 domain-containing protein
27	T_CL_1	FFX45_04005	CP040671	780659	781096	438	1	NA	DUF29 domain-containing protein
27	Te_BP_1	tsl2319	NC_004113	2410726	2411004	279	-1	NA	hypothetical protein
27	Te_BP_1	tsr2120	NC_004113	2205485	2205646	162	1	NA	hypothetical protein
27	Te_PKUAC_SCTE542	D3A95_04975	CP032152	1008820	1009284	465	-1	NA	DUF29 domain-containing protein
27	Tv_NIES_2134	CDC40_RS10155	NZ_AP018202	2074839	2075060	222	1	NA	DUF29 family protein
27	Tv_NIES_2134	CDC40_RS11210	NZ_AP018202	2279742	2280020	279	-1	NA	DUF29 domain-containing protein
28	Sl_PCC6715	BRW62_RS11740	NZ_CP018092	2408542	2411220	2679	-1	NA	CHAT domain-containing protein
28	T_CL_1	FFX45_05315	CP040671	1036658	1039348	2691	1	NA	CHAT domain-containing protein
28	T_CL_1	FFX45_06770	CP040671	1341786	1344317	2532	1	NA	CHAT domain-containing protein
28	T_NK55	NK55_RS08580	NC_023033	1758888	1761578	2691	1	NA	CHAT domain-containing protein
28	T_NK55	NK55_RS08980	NC_023033	1849869	1852391	2523	1	NA	CHAT domain-containing protein
28	Te_BP_1	tll2352	NC_004113	2451199	2453730	2532	-1	NA	hypothetical protein
28	Te_BP_1	tlr2085	NC_004113	2165608	2168298	2691	1	NA	hypothetical protein
28	Tv_NIES_2134	CDC40_RS11505	NZ_AP018202	2334333	2337023	2691	1	NA	CHAT domain-containing protein
28	Tv_NIES_2134	CDC40_RS12290	NZ_AP018202	2490201	2492732	2532	1	NA	CHAT domain-containing protein
29	Sl_PCC6715	BRW62_RS02340	NZ_CP018092	453249	454037	789	1	NA	E3 ubiquitin ligase
29	T_CL_1	FFX45_08715	CP040671	1765779	1766546	768	-1	NA	E3 ubiquitin ligase
29	T_CL_1	FFX45_10265	CP040671	2087412	2088200	789	-1	NA	E3 ubiquitin ligase
29	T_NK55	NK55_RS12230	NC_023033	213571	213984	414	1	NA	hypothetical protein
29	Te_BP_1	tll0199	NC_004113	179864	180613	750	-1	NA	hypothetical protein
29	Te_BP_1	tll0660	NC_004113	675911	676675	765	-1	NA	hypothetical protein
29	Te_PKUAC_SCTE542	D3A95_01885	CP032152	378312	379100	789	1	NA	E3 ubiquitin ligase
29	Tv_NIES_2134	CDC40_RS02430	NZ_AP018202	488003	488752	750	-1	NA	E3 ubiquitin ligase
30	Sl_PCC6715	BRW62_RS03775	NZ_CP018092	745101	745904	804	-1	pstB	phosphate ABC transporter ATP-binding protein
30	Sl_PCC6715	BRW62_RS10790	NZ_CP018092	2214960	2215772	813	1	NA	phosphate ABC transporter ATP-binding protein
30	T_CL_1	FFX45_04235	CP040671	822945	823748	804	1	pstB	phosphate ABC transporter ATP-binding protein
30	T_CL_1	FFX45_12340	CP040671	2512649	2513446	798	-1	NA	ATP-binding cassette domain-containing protein
30	T_NK55	NK55_RS07615	NC_023033	1561862	1562671	810	1	NA	phosphate ABC transporter ATP-binding protein
30	Te_BP_1	tlr2167	NC_004113	2246298	2247107	810	1	NA	ATP-binding protein of phosphate ABC transporter
30	Te_PKUAC_SCTE542	D3A95_02090	CP032152	424195	424998	804	-1	NA	ATP-binding cassette domain-containing protein
30	Tv_NIES_2134	CDC40_RS10390	NZ_AP018202	2115309	2116118	810	1	pstB	phosphate ABC transporter ATP-binding protein
31	Sl_PCC6715	BRW62_RS07775	NZ_CP018092	1548019	1548540	522	-1	NA	L,D-transpeptidase
31	T_CL_1	FFX45_10425	CP040671	2123333	2123848	516	1	NA	L,D-transpeptidase
31	T_NK55	NK55_RS12625	NC_023033	260188	260682	495	-1	NA	L,D-transpeptidase
31	Te_BP_1	tsr0686	NC_004113	706272	706553	282	1	NA	hypothetical protein
31	Te_BP_1	tsr0688	NC_004113	707856	708110	255	1	NA	hypothetical protein
31	Te_PKUAC_SCTE542	D3A95_01740	CP032152	347112	347402	291	-1	NA	L,D-transpeptidase
31	Te_PKUAC_SCTE542	D3A95_01745	CP032152	347321	347647	327	-1	NA	murein L,D-transpeptidase
31	Tv_NIES_2134	CDC40_RS02760	NZ_AP018202	552175	552549	375	-1	NA	L,D-transpeptidase
32	Sl_PCC6715	BRW62_RS09640	NZ_CP018092	1962795	1964798	2004	1	NA	ATP-binding cassette domain-containing protein
32	T_CL_1	FFX45_03215	CP040671	632836	634812	1977	-1	NA	ATP-binding cassette domain-containing protein
32	T_CL_1	FFX45_09310	CP040671	1884947	1886941	1995	-1	NA	ATP-binding cassette domain-containing protein
32	T_NK55	NK55_RS02270	NC_023033	468015	470009	1995	1	NA	ATP-binding cassette domain-containing protein
32	Te_BP_1	tlr1352	NC_004113	1410055	1412019	1965	1	nrtC	nitrate/nitrite transport system ATP-binding protein
32	Te_BP_1	tlr2002	NC_004113	2088774	2090750	1977	1	cmpC	bicarbonate transport system ATP-binding protein
32	Tv_NIES_2134	CDC40_RS05945	NZ_AP018202	1209998	1211992	1995	-1	NA	ATP-binding cassette domain-containing protein
32	Tv_NIES_2134	CDC40_RS09560	NZ_AP018202	1965767	1967743	1977	1	NA	ATP-binding cassette domain-containing protein
33	Sl_PCC6715	BRW62_RS11090	NZ_CP018092	2281526	2282800	1275	-1	NA	rod shape-determining protein RodA
33	T_CL_1	FFX45_01815	CP040671	366258	367526	1269	1	rodA	rod shape-determining protein RodA
33	T_CL_1	FFX45_05870	CP040671	1157123	1158493	1371	1	rodA	rod shape-determining protein RodA
33	T_NK55	NK55_RS04930	NC_023033	1029913	1031187	1275	-1	NA	rod shape-determining protein RodA
33	Te_BP_1	tlr1583	NC_004113	1644423	1645829	1407	1	NA	rod shape determining protein RodA
33	Te_PKUAC_SCTE542	D3A95_03865	CP032152	781009	782277	1269	-1	rodA	rod shape-determining protein RodA
33	Te_PKUAC_SCTE542	D3A95_06290	CP032152	1281974	1283248	1275	-1	rodA	rod shape-determining protein RodA
33	Tv_NIES_2134	CDC40_RS07685	NZ_AP018202	1584699	1586105	1407	-1	rodA	rod shape-determining protein RodA
34	Te_BP_1	tsl0239	NC_004113	222610	222816	207	-1	NA	transposase
34	Te_BP_1	tsl0441	NC_004113	440394	440600	207	-1	NA	transposase
34	Te_BP_1	tsl0544	NC_004113	546008	546214	207	-1	NA	transposase
34	Te_BP_1	tsl1244	NC_004113	1290363	1290569	207	-1	NA	transposase
34	Te_BP_1	tsr0753	NC_004113	779070	779276	207	1	NA	transposase
34	Te_BP_1	tsr0775	NC_004113	804568	804774	207	1	NA	transposase
34	Te_BP_1	tsr1000	NC_004113	1025140	1025346	207	1	NA	transposase
34	Te_BP_1	tsr1932	NC_004113	2022723	2022929	207	1	NA	transposase
35	Sl_PCC6715	BRW62_RS00655	NZ_CP018092	121828	122265	438	-1	aroH	chorismate mutase
35	T_CL_1	FFX45_07535	CP040671	1497516	1497947	432	-1	aroH	chorismate mutase
35	T_NK55	NK55_RS05790	NC_023033	1200732	1201163	432	-1	NA	chorismate mutase
35	T_NK55	NK55_RS05810	NC_023033	1203422	1203853	432	-1	NA	chorismate mutase
35	Te_BP_1	tll1803	NC_004113	1885440	1885871	432	-1	aroH	chorismate mutase
35	Te_PKUAC_SCTE542	D3A95_10520	CP032152	2105552	2105983	432	-1	aroH	chorismate mutase
35	Tv_NIES_2134	CDC40_RS08555	NZ_AP018202	1763965	1764396	432	-1	aroH	chorismate mutase
36	Sl_PCC6715	BRW62_RS01165	NZ_CP018092	227326	228627	1302	-1	NA	PDZ domain-containing protein
36	T_CL_1	FFX45_04455	CP040671	872900	874234	1335	1	NA	PDZ domain-containing protein
36	T_CL_1	FFX45_08945	CP040671	1804495	1805796	1302	1	NA	PDZ domain-containing protein
36	T_NK55	NK55_RS02515	NC_023033	525671	526972	1302	-1	NA	PDZ domain-containing protein
36	Te_BP_1	tll1406	NC_004113	1473723	1475024	1302	-1	NA	carboxyl-terminal processing protease
36	Te_PKUAC_SCTE542	D3A95_07590	CP032152	1523848	1525182	1335	-1	NA	PDZ domain-containing protein
36	Tv_NIES_2134	CDC40_RS05675	NZ_AP018202	1148957	1150258	1302	1	NA	PDZ domain-containing protein
37	Sl_PCC6715	BRW62_RS02795	NZ_CP018092	556935	557273	339	1	NA	hypothetical protein
37	Sl_PCC6715	BRW62_RS03805	NZ_CP018092	750974	751153	180	-1	NA	hypothetical protein
37	Sl_PCC6715	BRW62_RS05315	NZ_CP018092	1057982	1059193	1212	1	NA	ISL3 family transposase
37	Sl_PCC6715	BRW62_RS05330	NZ_CP018092	1059844	1061055	1212	1	NA	ISL3 family transposase
37	Sl_PCC6715	BRW62_RS07580	NZ_CP018092	1505566	1506027	462	-1	NA	hypothetical protein
37	Sl_PCC6715	BRW62_RS07640	NZ_CP018092	1519765	1520142	378	1	NA	hypothetical protein
37	Sl_PCC6715	BRW62_RS12015	NZ_CP018092	2469921	2470754	834	1	NA	hypothetical protein
38	Sl_PCC6715	BRW62_RS07340	NZ_CP018092	1455115	1455762	648	1	NA	WD40 repeat domain-containing protein
38	T_CL_1	FFX45_12075	CP040671	2451653	2452663	1011	1	NA	WD40 repeat domain-containing protein
38	Te_BP_1	tlr0728	NC_004113	746596	746967	372	1	NA	hypothetical protein
38	Te_BP_1	tsr0727	NC_004113	746249	746545	297	1	NA	hypothetical protein
38	Te_PKUAC_SCTE542	D3A95_11560	CP032152	2332026	2333036	1011	1	NA	WD40 repeat domain-containing protein
38	Tv_NIES_2134	CDC40_RS11690	NZ_AP018202	2378578	2378949	372	-1	NA	hypothetical protein
38	Tv_NIES_2134	CDC40_RS11695	NZ_AP018202	2379000	2379296	297	-1	NA	hypothetical protein
39	Sl_PCC6715	BRW62_RS07880	NZ_CP018092	1567493	1569346	1854	1	NA	flotillin
39	T_CL_1	FFX45_12635	CP040671	2567832	2569667	1836	1	NA	flotillin family protein
39	T_NK55	NK55_RS00725	NC_023033	152905	153099	195	-1	NA	hypothetical protein
39	Te_BP_1	tlr0263	NC_004113	246692	247132	441	1	NA	hypothetical protein
39	Te_PKUAC_SCTE542	D3A95_02465	CP032152	507474	507965	492	1	NA	hypothetical protein
39	Tv_NIES_2134	CDC40_RS00550	NZ_AP018202	115895	116335	441	-1	NA	hypothetical protein
39	Tv_NIES_2134	CDC40_RS00555	NZ_AP018202	116560	117621	1062	-1	NA	hypothetical protein
40	Sl_PCC6715	BRW62_RS09140	NZ_CP018092	1839585	1841777	2193	-1	NA	glycosyltransferase
40	T_CL_1	FFX45_07490	CP040671	1486207	1488414	2208	1	NA	glycosyltransferase
40	T_CL_1	FFX45_07495	CP040671	1488817	1491060	2244	1	NA	glycosyltransferase
40	T_NK55	NK55_RS05750	NC_023033	1192011	1194179	2169	1	NA	glycosyltransferase
40	Te_BP_1	tlr1795	NC_004113	1877135	1879303	2169	1	NA	cellulose synthase-like protein
40	Tv_NIES_2134	CDC40_RS08510	NZ_AP018202	1753064	1755271	2208	1	NA	glycosyltransferase
40	Tv_NIES_2134	CDC40_RS08515	NZ_AP018202	1755620	1757848	2229	1	NA	glycosyltransferase
41	Sl_PCC6715	BRW62_RS09880	NZ_CP018092	2020384	2022597	2214	1	NA	hypothetical protein
41	Sl_PCC6715	BRW62_RS11205	NZ_CP018092	2303618	2305783	2166	-1	NA	hypothetical protein
41	T_CL_1	FFX45_01285	CP040671	268384	270606	2223	-1	NA	hypothetical protein
41	T_NK55	NK55_RS11495	NC_023033	2361631	2363913	2283	-1	NA	hypothetical protein
41	Te_BP_1	tll0948	NC_004113	968180	970450	2271	-1	NA	hypothetical protein
41	Te_PKUAC_SCTE542	D3A95_04405	CP032152	881656	883887	2232	1	NA	hypothetical protein
41	Tv_NIES_2134	CDC40_RS04810	NZ_AP018202	985931	988201	2271	1	NA	hypothetical protein
42	Sl_PCC6715	BRW62_RS10155	NZ_CP018092	2086175	2086471	297	-1	NA	hypothetical protein
42	T_CL_1	FFX45_02020	CP040671	401217	401468	252	-1	NA	hypothetical protein
42	T_NK55	NK55_RS10715	NC_023033	2211806	2212504	699	1	NA	hypothetical protein
42	Te_BP_1	tlr0801	NC_004113	830820	831206	387	1	NA	hypothetical protein
42	Te_BP_1	tsr0802	NC_004113	831264	831518	255	1	NA	hypothetical protein
42	Te_PKUAC_SCTE542	D3A95_03675	CP032152	748581	748832	252	1	NA	hypothetical protein
42	Tv_NIES_2134	CDC40_RS01150	NZ_AP018202	227988	228242	255	-1	NA	hypothetical protein
43	Sl_PCC6715	BRW62_RS10955	NZ_CP018092	2255557	2257167	1611	1	NA	NYN domain-containing protein
43	T_CL_1	FFX45_11680	CP040671	2379049	2379489	441	1	NA	hypothetical protein
43	T_NK55	NK55_RS12265	NC_023033	335894	337495	1602	1	NA	NYN domain-containing protein
43	Te_BP_1	tll1112	NC_004113	1142906	1143346	441	-1	NA	hypothetical protein
43	Te_BP_1	tll1114	NC_004113	1144826	1145242	417	-1	NA	hypothetical protein
43	Te_PKUAC_SCTE542	D3A95_00715	CP032152	156755	157195	441	1	NA	hypothetical protein
43	Tv_NIES_2134	CDC40_RS03150	NZ_AP018202	638447	639136	690	1	NA	NYN domain-containing protein
44	T_CL_1	FFX45_01955	CP040671	389201	391675	2475	1	NA	hypothetical protein
44	Te_BP_1	tlr0320	NC_004113	305202	307889	2688	1	NA	hypothetical protein
44	Te_BP_1	tlr0361	NC_004113	354876	357524	2649	1	NA	hypothetical protein
44	Te_BP_1	tlr0362	NC_004113	358411	360996	2586	1	NA	hypothetical protein
44	Tv_NIES_2134	CDC40_RS00215	NZ_AP018202	38258	40963	2706	1	NA	hypothetical protein
44	Tv_NIES_2134	CDC40_RS00445	NZ_AP018202	89170	91758	2589	1	NA	GTPase domain-containing protein
44	Tv_NIES_2134	CDC40_RS00455	NZ_AP018202	92588	95134	2547	1	NA	GTPase domain-containing protein
45	T_CL_1	FFX45_12810	CP040671	2606475	2607197	723	1	NA	hypothetical protein
45	T_CL_1	FFX45_12815	CP040671	2607227	2607970	744	1	NA	hypothetical protein
45	T_CL_1	FFX45_12825	CP040671	2610106	2610957	852	1	NA	hypothetical protein
45	T_NK55	NK55_RS12385	NC_023033	962592	963446	855	-1	NA	hypothetical protein
45	Te_BP_1	tll1579	NC_004113	1641357	1642253	897	-1	NA	hypothetical protein
45	Te_PKUAC_SCTE542	D3A95_05065	CP032152	1027821	1028546	726	1	NA	hypothetical protein
45	Tv_NIES_2134	CDC40_RS07420	NZ_AP018202	1518904	1519716	813	-1	NA	hypothetical protein
46	T_CL_1	FFX45_06210	CP040671	1220368	1221162	795	-1	NA	hypothetical protein
46	T_CL_1	FFX45_06575	CP040671	1292710	1293330	621	1	NA	hypothetical protein
46	T_NK55	NK55_RS09110	NC_023033	1881955	1882575	621	-1	NA	hypothetical protein
46	Te_BP_1	tlr2328	NC_004113	2420651	2421364	714	1	NA	hypothetical protein
46	Te_PKUAC_SCTE542	D3A95_08990	CP032152	1815966	1816628	663	-1	NA	hypothetical protein
46	Te_PKUAC_SCTE542	D3A95_09000	CP032152	1817964	1818584	621	-1	NA	hypothetical protein
46	Tv_NIES_2134	CDC40_RS12410	NZ_AP018202	2522603	2523295	693	-1	NA	hypothetical protein
47	Sl_PCC6715	BRW62_RS00005	NZ_CP018092	155	1519	1365	1	NA	chromosomal replication initiator protein DnaA
47	T_CL_1	FFX45_00005	CP040671	1	1362	1362	1	dnaA	chromosomal replication initiator protein DnaA
47	T_NK55	NK55_RS00005	NC_023033	1	1362	1362	1	NA	chromosomal replication initiator protein DnaA
47	Te_BP_1	tlr0603	NC_004113	609990	611351	1362	1	dnaA	chromosome replication initiator DnaA
47	Te_PKUAC_SCTE542	D3A95_05230	CP032152	1065748	1067109	1362	1	dnaA	chromosomal replication initiator protein DnaA
47	Tv_NIES_2134	CDC40_RS04325	NZ_AP018202	880271	881632	1362	1	dnaA	chromosomal replication initiator protein DnaA
48	Sl_PCC6715	BRW62_RS00010	NZ_CP018092	1614	2060	447	1	NA	hypothetical protein
48	T_CL_1	FFX45_07160	CP040671	1422374	1422784	411	-1	NA	hypothetical protein
48	T_NK55	NK55_RS05415	NC_023033	1125800	1126210	411	-1	NA	hypothetical protein
48	Te_BP_1	tll1730	NC_004113	1810600	1811109	510	-1	NA	hypothetical protein
48	Te_PKUAC_SCTE542	D3A95_10125	CP032152	2028241	2028651	411	-1	NA	hypothetical protein
48	Tv_NIES_2134	CDC40_RS08170	NZ_AP018202	1685348	1685857	510	-1	NA	hypothetical protein
49	Sl_PCC6715	BRW62_RS00020	NZ_CP018092	2799	3476	678	1	NA	DUF3747 domain-containing protein
49	T_CL_1	FFX45_03020	CP040671	599014	599628	615	1	NA	DUF3747 domain-containing protein
49	T_NK55	NK55_RS06425	NC_023033	1340409	1341035	627	1	NA	DUF3747 domain-containing protein
49	Te_BP_1	tlr1926	NC_004113	2017611	2018258	648	1	NA	hypothetical protein
49	Te_PKUAC_SCTE542	D3A95_02655	CP032152	545894	546511	618	1	NA	DUF3747 domain-containing protein
49	Tv_NIES_2134	CDC40_RS09185	NZ_AP018202	1896093	1896740	648	1	NA	DUF3747 domain-containing protein
50	Sl_PCC6715	BRW62_RS00040	NZ_CP018092	5987	6361	375	1	NA	DUF4359 domain-containing protein
50	T_CL_1	FFX45_10805	CP040671	2192383	2192766	384	1	NA	DUF4359 domain-containing protein
50	T_NK55	NK55_RS02780	NC_023033	573660	574043	384	1	NA	DUF4359 domain-containing protein
50	Te_BP_1	tlr1459	NC_004113	1520946	1521329	384	1	NA	hypothetical protein
50	Te_PKUAC_SCTE542	D3A95_01360	CP032152	277424	277807	384	-1	NA	DUF4359 domain-containing protein
50	Tv_NIES_2134	CDC40_RS00975	NZ_AP018202	200388	200771	384	-1	NA	DUF4359 domain-containing protein
51	Sl_PCC6715	BRW62_RS00045	NZ_CP018092	6358	7041	684	-1	NA	urease accessory protein UreF
51	T_CL_1	FFX45_09240	CP040671	1872563	1873240	678	1	NA	urease accessory protein UreF
51	T_NK55	NK55_RS02325	NC_023033	479720	480415	696	-1	NA	urease accessory protein UreF
51	Te_BP_1	tll1365	NC_004113	1424269	1424946	678	-1	ureF	urease accessory protein F
51	Te_PKUAC_SCTE542	D3A95_12670	CP032152	2561409	2562086	678	-1	NA	urease accessory protein UreF
51	Tv_NIES_2134	CDC40_RS05885	NZ_AP018202	1198200	1198877	678	1	NA	urease accessory protein UreF
52	Sl_PCC6715	BRW62_RS00050	NZ_CP018092	7028	7471	444	-1	NA	urease accessory protein UreE
52	T_CL_1	FFX45_09235	CP040671	1872139	1872573	435	1	ureE	urease accessory protein UreE
52	T_NK55	NK55_RS02330	NC_023033	480405	480839	435	-1	NA	urease accessory protein UreE
52	Te_BP_1	tll1366	NC_004113	1424936	1425370	435	-1	ureE	urease accessory protein UreE
52	Te_PKUAC_SCTE542	D3A95_12675	CP032152	2562076	2562510	435	-1	ureE	urease accessory protein UreE
52	Tv_NIES_2134	CDC40_RS05880	NZ_AP018202	1197776	1198210	435	1	ureE	urease accessory protein UreE
53	Sl_PCC6715	BRW62_RS00060	NZ_CP018092	10710	11138	429	-1	NA	NUDIX domain-containing protein
53	T_CL_1	FFX45_05160	CP040671	1007505	1007948	444	1	NA	NUDIX domain-containing protein
53	T_NK55	NK55_RS08465	NC_023033	1737860	1738309	450	-1	NA	NUDIX domain-containing protein
53	Te_BP_1	tll2064	NC_004113	2144642	2145091	450	-1	NA	mutator MutT protein
53	Te_PKUAC_SCTE542	D3A95_08400	CP032152	1690532	1690981	450	-1	NA	NUDIX domain-containing protein
53	Tv_NIES_2134	CDC40_RS11385	NZ_AP018202	2311814	2312263	450	-1	NA	NUDIX domain-containing protein
54	Sl_PCC6715	BRW62_RS00065	NZ_CP018092	11481	11804	324	1	NA	DUF1815 family protein
54	T_CL_1	FFX45_05155	CP040671	1006813	1007133	321	-1	NA	DUF1815 family protein
54	T_NK55	NK55_RS08470	NC_023033	1738650	1738970	321	1	NA	DUF1815 family protein
54	Te_BP_1	tlr2065	NC_004113	2145394	2145753	360	1	NA	hypothetical protein
54	Te_PKUAC_SCTE542	D3A95_08405	CP032152	1691324	1691644	321	1	NA	DUF1815 family protein
54	Tv_NIES_2134	CDC40_RS11390	NZ_AP018202	2312605	2312925	321	1	NA	DUF1815 family protein
55	Sl_PCC6715	BRW62_RS00110	NZ_CP018092	21133	21828	696	1	NA	aldehyde oxygenase (deformylating)
55	T_CL_1	FFX45_09780	CP040671	1984235	1984930	696	-1	NA	aldehyde oxygenase (deformylating)
55	T_NK55	NK55_RS03280	NC_023033	678351	679046	696	1	NA	aldehyde oxygenase (deformylating)
55	Te_BP_1	tll1313	NC_004113	1362469	1363164	696	-1	NA	hypothetical protein
55	Te_PKUAC_SCTE542	D3A95_12120	CP032152	2444336	2445031	696	1	NA	aldehyde oxygenase (deformylating)
55	Tv_NIES_2134	CDC40_RS06155	NZ_AP018202	1260212	1260907	696	1	NA	aldehyde oxygenase (deformylating)
56	Sl_PCC6715	BRW62_RS00115	NZ_CP018092	21866	22894	1029	1	NA	long-chain acyl-[acyl-carrier-protein] reductase
56	T_CL_1	FFX45_09775	CP040671	1983162	1984190	1029	-1	NA	long-chain acyl-[acyl-carrier-protein] reductase
56	T_NK55	NK55_RS03285	NC_023033	679091	680119	1029	1	NA	long-chain acyl-[acyl-carrier-protein] reductase
56	Te_BP_1	tll1312	NC_004113	1361396	1362424	1029	-1	NA	hypothetical protein
56	Te_PKUAC_SCTE542	D3A95_12125	CP032152	2445076	2446104	1029	1	NA	long-chain acyl-[acyl-carrier-protein] reductase
56	Tv_NIES_2134	CDC40_RS06160	NZ_AP018202	1260952	1261980	1029	1	NA	long-chain acyl-[acyl-carrier-protein] reductase
57	Sl_PCC6715	BRW62_RS00120	NZ_CP018092	22943	23917	975	1	NA	acetyl-CoA carboxylase carboxyltransferase subunit alpha
57	T_CL_1	FFX45_09770	CP040671	1982164	1983138	975	-1	NA	acetyl-CoA carboxylase carboxyltransferase subunit alpha
57	T_NK55	NK55_RS03290	NC_023033	680143	681117	975	1	NA	acetyl-CoA carboxylase carboxyltransferase subunit alpha
57	Te_BP_1	tll1311	NC_004113	1360398	1361372	975	-1	accA	acetyl-CoA carboxylase carboxyltransferase subunit alpha
57	Te_PKUAC_SCTE542	D3A95_12130	CP032152	2446128	2447102	975	1	NA	acetyl-CoA carboxylase carboxyltransferase subunit alpha
57	Tv_NIES_2134	CDC40_RS06165	NZ_AP018202	1262004	1262978	975	1	NA	acetyl-CoA carboxylase carboxyltransferase subunit alpha
58	Sl_PCC6715	BRW62_RS00125	NZ_CP018092	23914	24621	708	1	NA	SDR family oxidoreductase
58	T_CL_1	FFX45_09765	CP040671	1981460	1982167	708	-1	NA	SDR family oxidoreductase
58	T_NK55	NK55_RS03295	NC_023033	681114	681821	708	1	NA	SDR family oxidoreductase
58	Te_BP_1	tll1310	NC_004113	1359694	1360401	708	-1	NA	short chain dehydrogenase
58	Te_PKUAC_SCTE542	D3A95_12135	CP032152	2447099	2447806	708	1	NA	SDR family oxidoreductase
58	Tv_NIES_2134	CDC40_RS06170	NZ_AP018202	1262975	1263682	708	1	NA	SDR family oxidoreductase
59	Sl_PCC6715	BRW62_RS00145	NZ_CP018092	28241	29431	1191	-1	NA	SpoIIE family protein phosphatase
59	T_CL_1	FFX45_12380	CP040671	2524026	2525201	1176	-1	NA	response regulator
59	T_NK55	NK55_RS02960	NC_023033	610213	611388	1176	-1	NA	SpoIIE family protein phosphatase
59	Te_BP_1	tlr1153	NC_004113	1185144	1186319	1176	1	NA	two-component response regulator
59	Te_PKUAC_SCTE542	D3A95_02240	CP032152	466260	467435	1176	-1	NA	response regulator
59	Tv_NIES_2134	CDC40_RS00780	NZ_AP018202	156550	157725	1176	1	NA	SpoIIE family protein phosphatase
60	Sl_PCC6715	BRW62_RS00175	NZ_CP018092	34402	34821	420	1	NA	hypothetical protein
60	T_CL_1	FFX45_07045	CP040671	1397158	1397577	420	1	NA	hypothetical protein
60	T_NK55	NK55_RS05315	NC_023033	1105226	1105645	420	1	NA	hypothetical protein
60	Te_BP_1	tlr1709	NC_004113	1789748	1790167	420	1	NA	hypothetical protein
60	Te_PKUAC_SCTE542	D3A95_03330	CP032152	678771	679190	420	1	NA	hypothetical protein
60	Tv_NIES_2134	CDC40_RS08065	NZ_AP018202	1664512	1664931	420	1	NA	hypothetical protein
61	Sl_PCC6715	BRW62_RS00195	NZ_CP018092	37480	37914	435	1	NA	hypothetical protein
61	T_CL_1	FFX45_01800	CP040671	364481	364918	438	1	NA	hypothetical protein
61	T_NK55	NK55_RS10970	NC_023033	2258573	2259010	438	-1	NA	hypothetical protein
61	Te_BP_1	tll0840	NC_004113	862798	863241	444	-1	NA	hypothetical protein
61	Te_PKUAC_SCTE542	D3A95_03880	CP032152	783617	784021	405	-1	NA	hypothetical protein
61	Tv_NIES_2134	CDC40_RS05360	NZ_AP018202	1095687	1096130	444	1	NA	hypothetical protein
62	Sl_PCC6715	BRW62_RS00200	NZ_CP018092	37939	38388	450	1	NA	YbjN domain-containing protein
62	T_CL_1	FFX45_01805	CP040671	364944	365405	462	1	NA	YbjN domain-containing protein
62	T_NK55	NK55_RS10965	NC_023033	2258085	2258546	462	-1	NA	YbjN domain-containing protein
62	Te_BP_1	tll0839	NC_004113	862310	862771	462	-1	NA	hypothetical protein
62	Te_PKUAC_SCTE542	D3A95_03875	CP032152	783130	783591	462	-1	NA	YbjN domain-containing protein
62	Tv_NIES_2134	CDC40_RS05365	NZ_AP018202	1096157	1096618	462	1	NA	YbjN domain-containing protein
63	Sl_PCC6715	BRW62_RS00220	NZ_CP018092	42960	43418	459	-1	NA	50S ribosomal protein L9
63	T_CL_1	FFX45_09440	CP040671	1914920	1915378	459	1	NA	50S ribosomal protein L9
63	T_NK55	NK55_RS02145	NC_023033	440073	440531	459	-1	NA	50S ribosomal protein L9
63	Te_BP_1	tlr2413	NC_004113	2524832	2525290	459	1	rplI	50S ribosomal protein L9
63	Te_PKUAC_SCTE542	D3A95_12460	CP032152	2519129	2519587	459	-1	NA	50S ribosomal protein L9
63	Tv_NIES_2134	CDC40_RS03695	NZ_AP018202	749769	750227	459	-1	NA	50S ribosomal protein L9
64	Sl_PCC6715	BRW62_RS00225	NZ_CP018092	43585	43716	132	-1	NA	photosystem I reaction center subunit IX
64	T_CL_1	FFX45_09435	CP040671	1914619	1914744	126	1	NA	photosystem I reaction center subunit IX
64	T_NK55	NK55_RS02150	NC_023033	440726	440851	126	-1	NA	photosystem I reaction center subunit IX
64	Te_BP_1	tsr2412	NC_004113	2524509	2524634	126	1	psaJ	photosystem I reaction center subunit IX
64	Te_PKUAC_SCTE542	D3A95_12465	CP032152	2519781	2519906	126	-1	NA	photosystem I reaction center subunit IX
64	Tv_NIES_2134	CDC40_RS03700	NZ_AP018202	750425	750550	126	-1	NA	photosystem I reaction center subunit IX
65	Sl_PCC6715	BRW62_RS00230	NZ_CP018092	43736	44230	495	-1	NA	Photosystem I reaction center subunit III
65	T_CL_1	FFX45_09430	CP040671	1914087	1914581	495	1	NA	Photosystem I reaction center subunit III
65	T_NK55	NK55_RS02155	NC_023033	440889	441383	495	-1	NA	photosystem I subunit III precursor, plastocyanin (cyt c553) docking protein PsaF
65	Te_BP_1	tlr2411	NC_004113	2523977	2524471	495	1	psaF	plastocyanin docking protein
65	Te_PKUAC_SCTE542	D3A95_12470	CP032152	2519944	2520438	495	-1	NA	Photosystem I reaction center subunit III
65	Tv_NIES_2134	CDC40_RS03705	NZ_AP018202	750588	751082	495	-1	NA	photosystem I reaction center subunit III
66	Sl_PCC6715	BRW62_RS00245	NZ_CP018092	48546	49091	546	1	NA	bifunctional pyr operon transcriptional regulator/uracil phosphoribosyltransferase PyrR
66	T_CL_1	FFX45_05020	CP040671	984528	985079	552	-1	pyrR	bifunctional pyr operon transcriptional regulator/uracil phosphoribosyltransferase PyrR
66	T_NK55	NK55_RS08300	NC_023033	1707266	1707808	543	-1	NA	bifunctional pyr operon transcriptional regulator/uracil phosphoribosyltransferase PyrR
66	Te_BP_1	tll2320	NC_004113	2410989	2411540	552	-1	NA	bifunctional pyrimidine regulatory protein PyrR/uracil phosphoribosyltransferase
66	Te_PKUAC_SCTE542	D3A95_08015	CP032152	1609990	1610541	552	-1	pyrR	bifunctional pyr operon transcriptional regulator/uracil phosphoribosyltransferase PyrR
66	Tv_NIES_2134	CDC40_RS11215	NZ_AP018202	2280005	2280556	552	-1	pyrR	bifunctional pyr operon transcriptional regulator/uracil phosphoribosyltransferase PyrR
67	Sl_PCC6715	BRW62_RS00260	NZ_CP018092	50980	51273	294	-1	NA	50S ribosomal protein L31
67	T_CL_1	FFX45_02475	CP040671	497334	497609	276	-1	NA	50S ribosomal protein L31
67	T_NK55	NK55_RS09945	NC_023033	2035160	2035435	276	1	NA	50S ribosomal protein L31
67	Te_BP_1	tsr0110	NC_004113	88195	88470	276	1	rpmE	50S ribosomal protein L31
67	Te_PKUAC_SCTE542	D3A95_09890	CP032152	1979564	1979839	276	1	NA	50S ribosomal protein L31
67	Tv_NIES_2134	CDC40_RS12065	NZ_AP018202	2460354	2460629	276	-1	NA	50S ribosomal protein L31
68	Sl_PCC6715	BRW62_RS00270	NZ_CP018092	51738	52196	459	-1	NA	50S ribosomal protein L13
68	T_CL_1	FFX45_02485	CP040671	498064	498522	459	-1	rplM	50S ribosomal protein L13
68	T_NK55	NK55_RS09935	NC_023033	2034247	2034705	459	1	NA	50S ribosomal protein L13
68	Te_BP_1	tlr0108	NC_004113	87282	87740	459	1	rplM	50S ribosomal protein L13
68	Te_PKUAC_SCTE542	D3A95_09880	CP032152	1978654	1979112	459	1	NA	50S ribosomal protein L13
68	Tv_NIES_2134	CDC40_RS12075	NZ_AP018202	2461084	2461542	459	-1	NA	50S ribosomal protein L13
69	Sl_PCC6715	BRW62_RS00280	NZ_CP018092	53072	53422	351	-1	NA	50S ribosomal protein L17
69	T_CL_1	FFX45_02495	CP040671	499400	499750	351	-1	NA	50S ribosomal protein L17
69	T_NK55	NK55_RS09925	NC_023033	2033019	2033369	351	1	NA	50S ribosomal protein L17
69	Te_BP_1	tlr0106	NC_004113	86054	86404	351	1	rplQ	50S ribosomal protein L17
69	Te_PKUAC_SCTE542	D3A95_09870	CP032152	1977440	1977790	351	1	NA	50S ribosomal protein L17
69	Tv_NIES_2134	CDC40_RS12085	NZ_AP018202	2462420	2462770	351	-1	NA	50S ribosomal protein L17
70	Sl_PCC6715	BRW62_RS00295	NZ_CP018092	54898	55278	381	-1	NA	30S ribosomal protein S13
70	T_CL_1	FFX45_02510	CP040671	501203	501583	381	-1	rpsM	30S ribosomal protein S13
70	T_NK55	NK55_RS09910	NC_023033	2031186	2031566	381	1	NA	30S ribosomal protein S13
70	Te_BP_1	tlr0103	NC_004113	84221	84601	381	1	rpsM	30S ribosomal protein S13
70	Te_PKUAC_SCTE542	D3A95_09855	CP032152	1975609	1975989	381	1	NA	30S ribosomal protein S13
70	Tv_NIES_2134	CDC40_RS12100	NZ_AP018202	2464223	2464603	381	-1	NA	30S ribosomal protein S13
71	Sl_PCC6715	BRW62_RS00300	NZ_CP018092	55313	55426	114	-1	NA	50S ribosomal protein L36
71	T_CL_1	FFX45_02515	CP040671	501617	501730	114	-1	rpmJ	50S ribosomal protein L36
71	T_NK55	NK55_RS09905	NC_023033	2031039	2031152	114	1	NA	50S ribosomal protein L36
71	Te_BP_1	tsr0102	NC_004113	84074	84187	114	1	rpmJ	50S ribosomal protein L36
71	Te_PKUAC_SCTE542	D3A95_09850	CP032152	1975462	1975575	114	1	NA	50S ribosomal protein L36
71	Tv_NIES_2134	CDC40_RS12105	NZ_AP018202	2464637	2464750	114	-1	NA	50S ribosomal protein L36
72	Sl_PCC6715	BRW62_RS00305	NZ_CP018092	55494	55718	225	-1	infA	translation initiation factor IF-1
72	T_CL_1	FFX45_02520	CP040671	501791	502015	225	-1	infA	translation initiation factor IF-1
72	T_NK55	NK55_RS09900	NC_023033	2030754	2030978	225	1	NA	translation initiation factor IF-1
72	Te_BP_1	tsr0101	NC_004113	83789	84013	225	1	infA	translation initiation factor IF-1
72	Te_PKUAC_SCTE542	D3A95_09845	CP032152	1975177	1975401	225	1	infA	translation initiation factor IF-1
72	Tv_NIES_2134	CDC40_RS12110	NZ_AP018202	2464811	2465035	225	-1	infA	translation initiation factor IF-1
73	Sl_PCC6715	BRW62_RS00310	NZ_CP018092	55711	56298	588	-1	NA	adenylate kinase
73	T_CL_1	FFX45_02525	CP040671	502008	502595	588	-1	NA	adenylate kinase
73	T_NK55	NK55_RS09895	NC_023033	2030174	2030761	588	1	NA	adenylate kinase
73	Te_BP_1	tlr0100	NC_004113	83209	83796	588	1	NA	adenylate kinase
73	Te_PKUAC_SCTE542	D3A95_09840	CP032152	1974597	1975184	588	1	NA	adenylate kinase
73	Tv_NIES_2134	CDC40_RS12115	NZ_AP018202	2465028	2465615	588	-1	NA	adenylate kinase
74	Sl_PCC6715	BRW62_RS00320	NZ_CP018092	57621	58082	462	-1	NA	50S ribosomal protein L15
74	T_CL_1	FFX45_02535	CP040671	503918	504382	465	-1	NA	50S ribosomal protein L15
74	T_NK55	NK55_RS09885	NC_023033	2028387	2028851	465	1	NA	50S ribosomal protein L15
74	Te_BP_1	tlr0098	NC_004113	81422	81886	465	1	rplO	50S ribosomal protein L15
74	Te_PKUAC_SCTE542	D3A95_09830	CP032152	1972811	1973275	465	1	NA	50S ribosomal protein L15
74	Tv_NIES_2134	CDC40_RS12125	NZ_AP018202	2466938	2467402	465	-1	NA	50S ribosomal protein L15
75	Sl_PCC6715	BRW62_RS00325	NZ_CP018092	58096	58620	525	-1	rpsE	30S ribosomal protein S5
75	T_CL_1	FFX45_02540	CP040671	504396	504920	525	-1	rpsE	30S ribosomal protein S5
75	T_NK55	NK55_RS09880	NC_023033	2027849	2028373	525	1	NA	30S ribosomal protein S5
75	Te_BP_1	tlr0097	NC_004113	80884	81408	525	1	rpsE	30S ribosomal protein S5
75	Te_PKUAC_SCTE542	D3A95_09825	CP032152	1972273	1972797	525	1	rpsE	30S ribosomal protein S5
75	Tv_NIES_2134	CDC40_RS12130	NZ_AP018202	2467416	2467940	525	-1	rpsE	30S ribosomal protein S5
76	Sl_PCC6715	BRW62_RS00330	NZ_CP018092	58632	58994	363	-1	NA	50S ribosomal protein L18
76	T_CL_1	FFX45_02545	CP040671	504932	505294	363	-1	NA	50S ribosomal protein L18
76	T_NK55	NK55_RS09875	NC_023033	2027475	2027837	363	1	NA	50S ribosomal protein L18
76	Te_BP_1	tlr0096	NC_004113	80510	80872	363	1	rplR	50S ribosomal protein L18
76	Te_PKUAC_SCTE542	D3A95_09820	CP032152	1971899	1972261	363	1	NA	50S ribosomal protein L18
76	Tv_NIES_2134	CDC40_RS12135	NZ_AP018202	2467952	2468314	363	-1	NA	50S ribosomal protein L18
77	Sl_PCC6715	BRW62_RS00335	NZ_CP018092	58995	59558	564	-1	NA	50S ribosomal protein L6
77	T_CL_1	FFX45_02550	CP040671	505295	505858	564	-1	NA	50S ribosomal protein L6
77	T_NK55	NK55_RS09870	NC_023033	2026911	2027474	564	1	NA	50S ribosomal protein L6
77	Te_BP_1	tlr0095	NC_004113	79946	80509	564	1	rplF	50S ribosomal protein L6
77	Te_PKUAC_SCTE542	D3A95_09815	CP032152	1971335	1971898	564	1	NA	50S ribosomal protein L6
77	Tv_NIES_2134	CDC40_RS12140	NZ_AP018202	2468315	2468878	564	-1	NA	50S ribosomal protein L6
78	Sl_PCC6715	BRW62_RS00340	NZ_CP018092	59577	59978	402	-1	NA	30S ribosomal protein S8
78	T_CL_1	FFX45_02555	CP040671	505877	506278	402	-1	rpsH	30S ribosomal protein S8
78	T_NK55	NK55_RS09865	NC_023033	2026491	2026892	402	1	NA	30S ribosomal protein S8
78	Te_BP_1	tlr0094	NC_004113	79526	79927	402	1	rpsH	30S ribosomal protein S8
78	Te_PKUAC_SCTE542	D3A95_09810	CP032152	1970915	1971316	402	1	NA	30S ribosomal protein S8
78	Tv_NIES_2134	CDC40_RS12145	NZ_AP018202	2468897	2469298	402	-1	NA	30S ribosomal protein S8
79	Sl_PCC6715	BRW62_RS00345	NZ_CP018092	60009	60554	546	-1	NA	50S ribosomal protein L5
79	T_CL_1	FFX45_02560	CP040671	506308	506853	546	-1	rplE	50S ribosomal protein L5
79	T_NK55	NK55_RS09860	NC_023033	2025916	2026461	546	1	NA	50S ribosomal protein L5
79	Te_BP_1	tlr0093	NC_004113	78951	79496	546	1	rplE	50S ribosomal protein L5
79	Te_PKUAC_SCTE542	D3A95_09805	CP032152	1970340	1970885	546	1	NA	50S ribosomal protein L5
79	Tv_NIES_2134	CDC40_RS12150	NZ_AP018202	2469328	2469873	546	-1	NA	50S ribosomal protein L5
80	Sl_PCC6715	BRW62_RS00350	NZ_CP018092	60605	60955	351	-1	NA	50S ribosomal protein L24
80	T_CL_1	FFX45_02565	CP040671	506912	507223	312	-1	NA	50S ribosomal protein L24
80	T_NK55	NK55_RS09855	NC_023033	2025504	2025857	354	1	NA	50S ribosomal protein L24
80	Te_BP_1	tlr0092	NC_004113	78540	78893	354	1	rplX	50S ribosomal protein L24
80	Te_PKUAC_SCTE542	D3A95_09800	CP032152	1969928	1970281	354	1	NA	50S ribosomal protein L24
80	Tv_NIES_2134	CDC40_RS12155	NZ_AP018202	2469931	2470242	312	-1	NA	50S ribosomal protein L24
81	Sl_PCC6715	BRW62_RS00360	NZ_CP018092	61336	61584	249	-1	NA	30S ribosomal protein S17
81	T_CL_1	FFX45_02575	CP040671	507646	507894	249	-1	rpsQ	30S ribosomal protein S17
81	T_NK55	NK55_RS09845	NC_023033	2024875	2025123	249	1	NA	30S ribosomal protein S17
81	Te_BP_1	tsr0090	NC_004113	77911	78159	249	1	rpsQ	30S ribosomal protein S17
81	Te_PKUAC_SCTE542	D3A95_09790	CP032152	1969300	1969548	249	1	NA	30S ribosomal protein S17
81	Tv_NIES_2134	CDC40_RS12165	NZ_AP018202	2470665	2470913	249	-1	NA	30S ribosomal protein S17
82	Sl_PCC6715	BRW62_RS00365	NZ_CP018092	61584	61796	213	-1	NA	50S ribosomal protein L29
82	T_CL_1	FFX45_02580	CP040671	507894	508106	213	-1	NA	50S ribosomal protein L29
82	T_NK55	NK55_RS09840	NC_023033	2024663	2024875	213	1	NA	50S ribosomal protein L29
82	Te_BP_1	tsr0089	NC_004113	77699	77911	213	1	rpmC	50S ribosomal protein L29
82	Te_PKUAC_SCTE542	D3A95_09785	CP032152	1969088	1969300	213	1	NA	50S ribosomal protein L29
82	Tv_NIES_2134	CDC40_RS12170	NZ_AP018202	2470913	2471125	213	-1	NA	50S ribosomal protein L29
83	Sl_PCC6715	BRW62_RS00370	NZ_CP018092	61799	62230	432	-1	NA	50S ribosomal protein L16
83	T_CL_1	FFX45_02585	CP040671	508109	508540	432	-1	rplP	50S ribosomal protein L16
83	T_NK55	NK55_RS09835	NC_023033	2024229	2024660	432	1	NA	50S ribosomal protein L16
83	Te_BP_1	tlr0088	NC_004113	77265	77696	432	1	rplP	50S ribosomal protein L16
83	Te_PKUAC_SCTE542	D3A95_09780	CP032152	1968654	1969085	432	1	NA	50S ribosomal protein L16
83	Tv_NIES_2134	CDC40_RS12175	NZ_AP018202	2471128	2471559	432	-1	NA	50S ribosomal protein L16
84	Sl_PCC6715	BRW62_RS00375	NZ_CP018092	62245	62961	717	-1	NA	30S ribosomal protein S3
84	T_CL_1	FFX45_02590	CP040671	508555	509271	717	-1	rpsC	30S ribosomal protein S3
84	T_NK55	NK55_RS09830	NC_023033	2023498	2024214	717	1	NA	30S ribosomal protein S3
84	Te_BP_1	tlr0087	NC_004113	76534	77250	717	1	rpsC	30S ribosomal protein S3
84	Te_PKUAC_SCTE542	D3A95_09775	CP032152	1967923	1968639	717	1	rpsC	30S ribosomal protein S3
84	Tv_NIES_2134	CDC40_RS12180	NZ_AP018202	2471574	2472290	717	-1	rpsC	30S ribosomal protein S3
85	Sl_PCC6715	BRW62_RS00380	NZ_CP018092	62974	63342	369	-1	NA	50S ribosomal protein L22
85	T_CL_1	FFX45_02595	CP040671	509284	509652	369	-1	NA	50S ribosomal protein L22
85	T_NK55	NK55_RS09825	NC_023033	2023117	2023485	369	1	NA	50S ribosomal protein L22
85	Te_BP_1	tlr0086	NC_004113	76153	76521	369	1	rplV	50S ribosomal protein L22
85	Te_PKUAC_SCTE542	D3A95_09770	CP032152	1967542	1967910	369	1	NA	50S ribosomal protein L22
85	Tv_NIES_2134	CDC40_RS12185	NZ_AP018202	2472303	2472671	369	-1	NA	50S ribosomal protein L22
86	Sl_PCC6715	BRW62_RS00385	NZ_CP018092	63379	63657	279	-1	rpsS	30S ribosomal protein S19
86	T_CL_1	FFX45_02600	CP040671	509683	509961	279	-1	rpsS	30S ribosomal protein S19
86	T_NK55	NK55_RS09820	NC_023033	2022820	2023086	267	1	NA	30S ribosomal protein S19
86	Te_BP_1	tsr0085	NC_004113	75844	76122	279	1	rps19	30S ribosomal protein S19
86	Te_PKUAC_SCTE542	D3A95_09765	CP032152	1967234	1967512	279	1	rpsS	30S ribosomal protein S19
86	Tv_NIES_2134	CDC40_RS12190	NZ_AP018202	2472702	2472980	279	-1	rpsS	30S ribosomal protein S19
87	Sl_PCC6715	BRW62_RS00390	NZ_CP018092	63680	64546	867	-1	rplB	50S ribosomal protein L2
87	T_CL_1	FFX45_02605	CP040671	509984	510850	867	-1	rplB	50S ribosomal protein L2
87	T_NK55	NK55_RS09815	NC_023033	2021920	2022786	867	1	NA	50S ribosomal protein L2
87	Te_BP_1	tlr0084	NC_004113	74955	75821	867	1	rplB	50S ribosomal protein L2
87	Te_PKUAC_SCTE542	D3A95_09760	CP032152	1966345	1967211	867	1	rplB	50S ribosomal protein L2
87	Tv_NIES_2134	CDC40_RS12195	NZ_AP018202	2473003	2473869	867	-1	rplB	50S ribosomal protein L2
88	Sl_PCC6715	BRW62_RS00415	NZ_CP018092	67539	68111	573	1	NA	DUF2752 domain-containing protein
88	T_CL_1	FFX45_02630	CP040671	513917	514405	489	1	NA	DUF2752 domain-containing protein
88	T_NK55	NK55_RS09790	NC_023033	2018366	2018857	492	-1	NA	DUF2752 domain-containing protein
88	Te_BP_1	tll0079	NC_004113	71398	71889	492	-1	NA	hypothetical protein
88	Te_PKUAC_SCTE542	D3A95_09735	CP032152	1962798	1963283	486	-1	NA	DUF2752 domain-containing protein
88	Tv_NIES_2134	CDC40_RS12220	NZ_AP018202	2476935	2477426	492	1	NA	DUF2752 domain-containing protein
89	Sl_PCC6715	BRW62_RS00435	NZ_CP018092	71327	71665	339	-1	NA	P-II family nitrogen regulator
89	T_CL_1	FFX45_12930	CP040671	2635811	2636149	339	-1	NA	P-II family nitrogen regulator
89	T_NK55	NK55_RS12140	NC_023033	2508036	2508374	339	-1	NA	P-II family nitrogen regulator
89	Te_BP_1	tll0591	NC_004113	597956	598294	339	-1	glnB	nitrogen regulatory protein P-II
89	Te_PKUAC_SCTE542	D3A95_05170	CP032152	1053754	1054092	339	-1	NA	P-II family nitrogen regulator
89	Tv_NIES_2134	CDC40_RS04265	NZ_AP018202	868237	868575	339	-1	NA	P-II family nitrogen regulator
90	Sl_PCC6715	BRW62_RS00445	NZ_CP018092	72142	72780	639	1	rph	ribonuclease PH
90	T_CL_1	FFX45_12935	CP040671	2636327	2637055	729	1	NA	ribonuclease PH
90	T_NK55	NK55_RS12145	NC_023033	2508552	2509280	729	1	NA	ribonuclease PH
90	Te_BP_1	tlr0592	NC_004113	598451	599200	750	1	rph	ribonuclease PH
90	Te_PKUAC_SCTE542	D3A95_05175	CP032152	1054255	1054983	729	1	NA	ribonuclease PH
90	Tv_NIES_2134	CDC40_RS04270	NZ_AP018202	868732	869481	750	1	NA	ribonuclease PH
91	Sl_PCC6715	BRW62_RS00460	NZ_CP018092	74418	75941	1524	1	NA	YifB family Mg chelatase-like AAA ATPase
91	T_CL_1	FFX45_12945	CP040671	2637832	2639361	1530	1	NA	ATP-binding protein
91	T_NK55	NK55_RS12155	NC_023033	2510059	2511588	1530	1	NA	YifB family Mg chelatase-like AAA ATPase
91	Te_BP_1	tlr0594	NC_004113	599976	601505	1530	1	NA	competence protein ComM
91	Te_PKUAC_SCTE542	D3A95_05185	CP032152	1055759	1057288	1530	1	NA	ATP-binding protein
91	Tv_NIES_2134	CDC40_RS04280	NZ_AP018202	870257	871786	1530	1	NA	YifB family Mg chelatase-like AAA ATPase
92	Sl_PCC6715	BRW62_RS00465	NZ_CP018092	75895	77181	1287	1	NA	ABC transporter substrate-binding protein
92	T_CL_1	FFX45_12950	CP040671	2639294	2640604	1311	1	NA	ABC transporter substrate-binding protein
92	T_NK55	NK55_RS12160	NC_023033	2511521	2512831	1311	1	NA	ABC transporter substrate-binding protein
92	Te_BP_1	tlr0595	NC_004113	601438	602748	1311	1	NA	sugar transporter
92	Te_PKUAC_SCTE542	D3A95_05190	CP032152	1057221	1058531	1311	1	NA	ABC transporter substrate-binding protein
92	Tv_NIES_2134	CDC40_RS04285	NZ_AP018202	871719	873029	1311	1	NA	ABC transporter substrate-binding protein
93	Sl_PCC6715	BRW62_RS00475	NZ_CP018092	78760	80802	2043	1	NA	ribonuclease E/G
93	T_CL_1	FFX45_12960	CP040671	2642144	2644132	1989	1	NA	Rne/Rng family ribonuclease
93	T_NK55	NK55_RS12170	NC_023033	2514384	2516372	1989	1	NA	Rne/Rng family ribonuclease
93	Te_BP_1	tlr0597	NC_004113	604291	606297	2007	1	rne	ribonuclease E
93	Te_PKUAC_SCTE542	D3A95_05200	CP032152	1060070	1062058	1989	1	NA	Rne/Rng family ribonuclease
93	Tv_NIES_2134	CDC40_RS04295	NZ_AP018202	874572	876578	2007	1	NA	Rne/Rng family ribonuclease
94	Sl_PCC6715	BRW62_RS00485	NZ_CP018092	82269	83750	1482	1	NA	hypothetical protein
94	T_CL_1	FFX45_00125	CP040671	28062	29537	1476	1	NA	hypothetical protein
94	T_NK55	NK55_RS00085	NC_023033	18512	19987	1476	1	NA	hypothetical protein
94	Te_BP_1	tlr1006	NC_004113	1030590	1032065	1476	1	NA	hypothetical protein
94	Te_PKUAC_SCTE542	D3A95_05345	CP032152	1089245	1090720	1476	1	NA	hypothetical protein
94	Tv_NIES_2134	CDC40_RS04425	NZ_AP018202	899145	900620	1476	1	NA	hypothetical protein
95	Sl_PCC6715	BRW62_RS00490	NZ_CP018092	83784	84560	777	1	NA	hypothetical protein
95	T_CL_1	FFX45_00130	CP040671	29567	30322	756	1	NA	hypothetical protein
95	T_NK55	NK55_RS00090	NC_023033	20029	20772	744	1	NA	hypothetical protein
95	Te_BP_1	tlr1007	NC_004113	1032095	1032850	756	1	NA	hypothetical protein
95	Te_PKUAC_SCTE542	D3A95_05350	CP032152	1090762	1091505	744	1	NA	hypothetical protein
95	Tv_NIES_2134	CDC40_RS04430	NZ_AP018202	900650	901405	756	1	NA	hypothetical protein
96	Sl_PCC6715	BRW62_RS00495	NZ_CP018092	84557	85444	888	-1	NA	hypothetical protein
96	T_CL_1	FFX45_11255	CP040671	2283622	2284530	909	1	NA	hypothetical protein
96	T_NK55	NK55_RS00910	NC_023033	184489	185376	888	-1	NA	hypothetical protein
96	Te_BP_1	tlr0230	NC_004113	211783	212676	894	1	NA	hypothetical protein
96	Te_PKUAC_SCTE542	D3A95_00255	CP032152	50531	51439	909	1	NA	hypothetical protein
96	Tv_NIES_2134	CDC40_RS02580	NZ_AP018202	517007	517900	894	1	NA	hypothetical protein
97	Sl_PCC6715	BRW62_RS00505	NZ_CP018092	86012	86749	738	-1	NA	lipoate--protein ligase family protein
97	T_CL_1	FFX45_11245	CP040671	2282326	2283078	753	1	NA	lipoate--protein ligase family protein
97	T_NK55	NK55_RS00920	NC_023033	185920	186681	762	-1	NA	lipoate--protein ligase family protein
97	Te_BP_1	tlr0228	NC_004113	210500	211240	741	1	NA	hypothetical protein
97	Te_PKUAC_SCTE542	D3A95_00245	CP032152	49248	50009	762	1	NA	lipoate--protein ligase family protein
97	Tv_NIES_2134	CDC40_RS02570	NZ_AP018202	515724	516464	741	1	NA	lipoate--protein ligase family protein
98	Sl_PCC6715	BRW62_RS00510	NZ_CP018092	86751	87923	1173	-1	NA	molybdopterin-synthase adenylyltransferase MoeB
98	T_CL_1	FFX45_09385	CP040671	1905748	1906920	1173	1	moeB	molybdopterin-synthase adenylyltransferase MoeB
98	T_NK55	NK55_RS02195	NC_023033	448095	449267	1173	-1	NA	molybdopterin-synthase adenylyltransferase MoeB
98	Te_BP_1	tlr2403	NC_004113	2516186	2517358	1173	1	moeB	hypothetical protein
98	Te_PKUAC_SCTE542	D3A95_12520	CP032152	2528032	2529204	1173	-1	moeB	molybdopterin-synthase adenylyltransferase MoeB
98	Tv_NIES_2134	CDC40_RS03745	NZ_AP018202	757691	758863	1173	-1	moeB	molybdopterin-synthase adenylyltransferase MoeB
99	Sl_PCC6715	BRW62_RS00555	NZ_CP018092	98250	100049	1800	1	NA	proline--tRNA ligase
99	T_CL_1	FFX45_02145	CP040671	424328	426136	1809	-1	NA	proline--tRNA ligase
99	T_NK55	NK55_RS10595	NC_023033	2187474	2189282	1809	1	NA	proline--tRNA ligase
99	Te_BP_1	tlr0777	NC_004113	806496	808304	1809	1	proS	prolyl-tRNA synthetase
99	Te_PKUAC_SCTE542	D3A95_03550	CP032152	723724	725532	1809	1	NA	proline--tRNA ligase
99	Tv_NIES_2134	CDC40_RS01275	NZ_AP018202	251200	253008	1809	-1	NA	proline--tRNA ligase
100	Sl_PCC6715	BRW62_RS00565	NZ_CP018092	101426	102691	1266	-1	NA	dihydroorotase
100	T_CL_1	FFX45_08080	CP040671	1611281	1612546	1266	1	NA	dihydroorotase
100	T_NK55	NK55_RS04415	NC_023033	920548	921837	1290	1	NA	dihydroorotase
100	Te_BP_1	tlr1533	NC_004113	1599187	1600476	1290	1	pyrC	dihydroorotase
100	Te_PKUAC_SCTE542	D3A95_11025	CP032152	2221030	2222295	1266	-1	NA	dihydroorotase
100	Tv_NIES_2134	CDC40_RS07180	NZ_AP018202	1476734	1478023	1290	1	NA	dihydroorotase
101	Sl_PCC6715	BRW62_RS00575	NZ_CP018092	104111	104590	480	1	NA	crossover junction endodeoxyribonuclease RuvC
101	T_CL_1	FFX45_12475	CP040671	2542080	2542559	480	-1	ruvC	crossover junction endodeoxyribonuclease RuvC
101	T_NK55	NK55_RS03025	NC_023033	623999	624478	480	-1	NA	crossover junction endodeoxyribonuclease RuvC
101	Te_BP_1	tlr1137	NC_004113	1169061	1169540	480	1	ruvC	Holliday junction resolvase
101	Te_PKUAC_SCTE542	D3A95_02305	CP032152	480234	480713	480	-1	ruvC	crossover junction endodeoxyribonuclease RuvC
101	Tv_NIES_2134	CDC40_RS00715	NZ_AP018202	143405	143884	480	1	ruvC	crossover junction endodeoxyribonuclease RuvC
102	Sl_PCC6715	BRW62_RS00595	NZ_CP018092	107098	108081	984	1	NA	alpha-ketoacid dehydrogenase subunit beta
102	T_CL_1	FFX45_08740	CP040671	1770435	1771418	984	-1	NA	alpha-ketoacid dehydrogenase subunit beta
102	T_NK55	NK55_RS01025	NC_023033	208338	209321	984	1	NA	alpha-ketoacid dehydrogenase subunit beta
102	Te_BP_1	tll0204	NC_004113	184535	185518	984	-1	NA	pyruvate dehydrogenase E1 component beta subunit
102	Te_PKUAC_SCTE542	D3A95_00085	CP032152	16956	17939	984	1	NA	alpha-ketoacid dehydrogenase subunit beta
102	Tv_NIES_2134	CDC40_RS02455	NZ_AP018202	492674	493657	984	-1	NA	alpha-ketoacid dehydrogenase subunit beta
103	Sl_PCC6715	BRW62_RS00620	NZ_CP018092	112308	112604	297	1	NA	Mo-dependent nitrogenase
103	T_CL_1	FFX45_11315	CP040671	2297954	2298241	288	-1	NA	Mo-dependent nitrogenase
103	T_NK55	NK55_RS03170	NC_023033	651823	652110	288	-1	NA	hypothetical protein
103	Te_BP_1	tsr1335	NC_004113	1389356	1389643	288	1	NA	hypothetical protein
103	Te_PKUAC_SCTE542	D3A95_00315	CP032152	64837	65124	288	-1	NA	Mo-dependent nitrogenase
103	Tv_NIES_2134	CDC40_RS06045	NZ_AP018202	1233269	1233556	288	-1	NA	nitrogenase
104	Sl_PCC6715	BRW62_RS00630	NZ_CP018092	113237	113992	756	-1	NA	adenosylcobinamide-GDP ribazoletransferase
104	T_CL_1	FFX45_11305	CP040671	2296560	2297291	732	1	NA	adenosylcobinamide-GDP ribazoletransferase
104	T_NK55	NK55_RS03160	NC_023033	650429	651160	732	1	NA	adenosylcobinamide-GDP ribazoletransferase
104	Te_BP_1	tll1337	NC_004113	1390306	1391037	732	-1	cobS	adenosylcobinamide-GDP ribazoletransferase
104	Te_PKUAC_SCTE542	D3A95_00305	CP032152	63447	64175	729	1	NA	adenosylcobinamide-GDP ribazoletransferase
104	Tv_NIES_2134	CDC40_RS06035	NZ_AP018202	1231875	1232606	732	1	NA	adenosylcobinamide-GDP ribazoletransferase
105	Sl_PCC6715	BRW62_RS00650	NZ_CP018092	121373	121831	459	-1	NA	CBS domain-containing protein
105	T_CL_1	FFX45_07530	CP040671	1497043	1497513	471	-1	NA	CBS domain-containing protein
105	T_NK55	NK55_RS05785	NC_023033	1200259	1200729	471	-1	NA	CBS domain-containing protein
105	T_NK55	NK55_RS05805	NC_023033	1202949	1203419	471	-1	NA	CBS domain-containing protein
105	Te_BP_1	tll1802	NC_004113	1884967	1885437	471	-1	NA	hypothetical protein
105	Tv_NIES_2134	CDC40_RS08550	NZ_AP018202	1763492	1763962	471	-1	NA	CBS domain-containing protein
106	Sl_PCC6715	BRW62_RS00660	NZ_CP018092	122284	123108	825	-1	sppA	signal peptide peptidase SppA
106	T_CL_1	FFX45_07540	CP040671	1497978	1498802	825	-1	sppA	signal peptide peptidase SppA
106	T_NK55	NK55_RS05815	NC_023033	1203884	1204708	825	-1	NA	signal peptide peptidase SppA
106	Te_BP_1	tll1804	NC_004113	1885902	1886726	825	-1	NA	protease
106	Te_PKUAC_SCTE542	D3A95_10525	CP032152	2106014	2106838	825	-1	sppA	signal peptide peptidase SppA
106	Tv_NIES_2134	CDC40_RS08560	NZ_AP018202	1764427	1765251	825	-1	sppA	signal peptide peptidase SppA
107	Sl_PCC6715	BRW62_RS00670	NZ_CP018092	124278	125003	726	1	NA	hypothetical protein
107	T_CL_1	FFX45_03865	CP040671	758867	759730	864	1	NA	hypothetical protein
107	T_NK55	NK55_RS07270	NC_023033	1501190	1501912	723	1	NA	hypothetical protein
107	Te_BP_1	tlr0462	NC_004113	462659	463522	864	1	NA	hypothetical protein
107	Te_PKUAC_SCTE542	D3A95_06850	CP032152	1383724	1384587	864	1	NA	hypothetical protein
107	Tv_NIES_2134	CDC40_RS10005	NZ_AP018202	2050922	2051785	864	1	NA	hypothetical protein
108	Sl_PCC6715	BRW62_RS00680	NZ_CP018092	126136	126477	342	-1	NA	iron-sulfur cluster assembly accessory protein
108	T_CL_1	FFX45_03875	CP040671	760833	761171	339	-1	NA	iron-sulfur cluster assembly accessory protein
108	T_NK55	NK55_RS07280	NC_023033	1503015	1503353	339	-1	NA	iron-sulfur cluster assembly accessory protein
108	Te_BP_1	tll0464	NC_004113	464625	464963	339	-1	NA	hypothetical protein
108	Te_PKUAC_SCTE542	D3A95_06860	CP032152	1385689	1386027	339	-1	NA	iron-sulfur cluster assembly accessory protein
108	Tv_NIES_2134	CDC40_RS10015	NZ_AP018202	2052888	2053226	339	-1	NA	iron-sulfur cluster assembly accessory protein
109	Sl_PCC6715	BRW62_RS00715	NZ_CP018092	132122	132346	225	1	NA	replication restart DNA helicase PriA
109	T_CL_1	FFX45_07395	CP040671	1470535	1470759	225	1	NA	replication restart DNA helicase PriA
109	T_NK55	NK55_RS05660	NC_023033	1176144	1176368	225	1	NA	hypothetical protein
109	Te_BP_1	tsr1775	NC_004113	1860103	1860327	225	1	NA	hypothetical protein
109	Te_PKUAC_SCTE542	D3A95_10370	CP032152	2077656	2077880	225	1	NA	replication restart DNA helicase PriA
109	Tv_NIES_2134	CDC40_RS08405	NZ_AP018202	1734848	1735072	225	1	NA	replication restart DNA helicase PriA
110	Sl_PCC6715	BRW62_RS00725	NZ_CP018092	132764	133102	339	1	NA	hypothetical protein
110	T_CL_1	FFX45_04495	CP040671	882743	883126	384	-1	NA	hypothetical protein
110	T_NK55	NK55_RS07890	NC_023033	1624605	1624952	348	1	NA	hypothetical protein
110	Te_BP_1	tlr2239	NC_004113	2322114	2322461	348	1	NA	hypothetical protein
110	Te_PKUAC_SCTE542	D3A95_07550	CP032152	1515163	1515546	384	1	NA	hypothetical protein
110	Tv_NIES_2134	CDC40_RS10760	NZ_AP018202	2191870	2192217	348	1	NA	hypothetical protein
111	Sl_PCC6715	BRW62_RS00730	NZ_CP018092	133099	133530	432	-1	NA	hypothetical protein
111	T_CL_1	FFX45_02660	CP040671	518368	518802	435	-1	NA	hypothetical protein
111	T_NK55	NK55_RS09765	NC_023033	2015015	2015374	360	1	NA	hypothetical protein
111	Te_BP_1	tlr0074	NC_004113	67985	68413	429	1	NA	hypothetical protein
111	Te_PKUAC_SCTE542	D3A95_09705	CP032152	1958397	1958831	435	1	NA	hypothetical protein
111	Tv_NIES_2134	CDC40_RS12245	NZ_AP018202	2480411	2480839	429	-1	NA	hypothetical protein
112	Sl_PCC6715	BRW62_RS00735	NZ_CP018092	133707	135071	1365	1	NA	UDP-N-acetylmuramoyl-L-alanine--D-glutamate ligase
112	T_CL_1	FFX45_02665	CP040671	518946	520310	1365	1	NA	UDP-N-acetylmuramoyl-L-alanine--D-glutamate ligase
112	T_NK55	NK55_RS09760	NC_023033	2013425	2014789	1365	-1	NA	UDP-N-acetylmuramoyl-L-alanine--D-glutamate ligase
112	Te_BP_1	tll0073	NC_004113	66470	67834	1365	-1	murD	UDP-N-acetylmuramoyl-L-alanyl-D-glutamate synthetase
112	Te_PKUAC_SCTE542	D3A95_09700	CP032152	1956881	1958245	1365	-1	NA	UDP-N-acetylmuramoyl-L-alanine--D-glutamate ligase
112	Tv_NIES_2134	CDC40_RS12250	NZ_AP018202	2480990	2482354	1365	1	NA	UDP-N-acetylmuramoyl-L-alanine--D-glutamate ligase
113	Sl_PCC6715	BRW62_RS00755	NZ_CP018092	137785	138747	963	1	NA	DUF362 domain-containing protein
113	T_CL_1	FFX45_01655	CP040671	341132	342094	963	1	NA	DUF362 domain-containing protein
113	T_NK55	NK55_RS11115	NC_023033	2281385	2282347	963	-1	NA	DUF362 domain-containing protein
113	Te_BP_1	tll0869	NC_004113	885617	886624	1008	-1	NA	hypothetical protein
113	Te_PKUAC_SCTE542	D3A95_04020	CP032152	805651	806613	963	-1	NA	DUF362 domain-containing protein
113	Tv_NIES_2134	CDC40_RS05215	NZ_AP018202	1072306	1073313	1008	1	NA	DUF362 domain-containing protein
114	Sl_PCC6715	BRW62_RS00760	NZ_CP018092	139145	140209	1065	1	NA	adenosine deaminase
114	T_CL_1	FFX45_02370	CP040671	480016	481068	1053	1	NA	adenosine deaminase
114	T_NK55	NK55_RS04095	NC_023033	850689	851741	1053	1	NA	adenosine deaminase
114	Te_BP_1	tlr1233	NC_004113	1278119	1278988	870	1	NA	adenosine deaminase
114	Te_PKUAC_SCTE542	D3A95_09990	CP032152	1995898	1996950	1053	-1	NA	adenosine deaminase
114	Tv_NIES_2134	CDC40_RS06805	NZ_AP018202	1398096	1399148	1053	1	NA	adenosine deaminase
115	Sl_PCC6715	BRW62_RS00770	NZ_CP018092	142105	143397	1293	-1	NA	efflux RND transporter periplasmic adaptor subunit
115	T_CL_1	FFX45_07215	CP040671	1433131	1434417	1287	1	NA	efflux RND transporter periplasmic adaptor subunit
115	T_NK55	NK55_RS05485	NC_023033	1139717	1141003	1287	1	NA	efflux RND transporter periplasmic adaptor subunit
115	Te_BP_1	tlr1743	NC_004113	1824565	1825851	1287	1	NA	hypothetical protein
115	Te_PKUAC_SCTE542	D3A95_10190	CP032152	2040218	2041504	1287	1	NA	efflux RND transporter periplasmic adaptor subunit
115	Tv_NIES_2134	CDC40_RS08240	NZ_AP018202	1699309	1700595	1287	1	NA	efflux RND transporter periplasmic adaptor subunit
116	Sl_PCC6715	BRW62_RS00780	NZ_CP018092	143932	144258	327	1	NA	2Fe-2S iron-sulfur cluster binding domain-containing protein
116	T_CL_1	FFX45_07705	CP040671	1532427	1532753	327	1	NA	2Fe-2S iron-sulfur cluster binding domain-containing protein
116	T_NK55	NK55_RS04110	NC_023033	853679	854005	327	1	NA	2Fe-2S iron-sulfur cluster binding domain-containing protein
116	Te_BP_1	tlr1236	NC_004113	1280919	1281245	327	1	NA	ferredoxin
116	Te_PKUAC_SCTE542	D3A95_11255	CP032152	2265826	2266152	327	-1	NA	ferredoxin
116	Tv_NIES_2134	CDC40_RS06820	NZ_AP018202	1401079	1401405	327	1	NA	2Fe-2S iron-sulfur cluster binding domain-containing protein
117	Sl_PCC6715	BRW62_RS00790	NZ_CP018092	145865	146227	363	1	NA	response regulator
117	T_CL_1	FFX45_12800	CP040671	2604542	2604904	363	-1	NA	response regulator
117	T_NK55	NK55_RS12035	NC_023033	2482038	2482400	363	-1	NA	response regulator
117	Te_BP_1	tll0571	NC_004113	571908	572270	363	-1	NA	two-component response regulator
117	Te_PKUAC_SCTE542	D3A95_05040	CP032152	1022024	1022386	363	-1	NA	response regulator
117	Tv_NIES_2134	CDC40_RS04160	NZ_AP018202	842207	842569	363	-1	NA	response regulator
118	Sl_PCC6715	BRW62_RS00810	NZ_CP018092	152379	152879	501	1	NA	hypothetical protein
118	T_CL_1	FFX45_12780	CP040671	2597880	2598377	498	-1	NA	chemotaxis protein CheW
118	T_NK55	NK55_RS12015	NC_023033	2475379	2475870	492	-1	NA	chemotaxis protein CheW
118	Te_BP_1	tll0567	NC_004113	565255	565752	498	-1	NA	hypothetical protein
118	Te_PKUAC_SCTE542	D3A95_05020	CP032152	1015370	1015867	498	-1	NA	chemotaxis protein CheW
118	Tv_NIES_2134	CDC40_RS04145	NZ_AP018202	840343	840840	498	-1	NA	chemotaxis protein CheW
119	Sl_PCC6715	BRW62_RS00820	NZ_CP018092	153787	154335	549	-1	rfbC	dTDP-4-dehydrorhamnose 3,5-epimerase
119	T_CL_1	FFX45_03835	CP040671	753512	754060	549	-1	rfbC	dTDP-4-dehydrorhamnose 3,5-epimerase
119	T_NK55	NK55_RS07240	NC_023033	1495680	1496228	549	-1	NA	dTDP-4-dehydrorhamnose 3,5-epimerase
119	Te_BP_1	tll0456	NC_004113	457250	457798	549	-1	rfbC	dTDP-4-dehydrorhamnose 3,5-epimerase
119	Te_PKUAC_SCTE542	D3A95_06820	CP032152	1378379	1378927	549	-1	rfbC	dTDP-4-dehydrorhamnose 3,5-epimerase
119	Tv_NIES_2134	CDC40_RS09975	NZ_AP018202	2045513	2046061	549	-1	rfbC	dTDP-4-dehydrorhamnose 3,5-epimerase
120	Sl_PCC6715	BRW62_RS00845	NZ_CP018092	158102	158536	435	1	NA	nucleoside deaminase
120	T_CL_1	FFX45_03850	CP040671	756132	756569	438	1	NA	nucleoside deaminase
120	T_NK55	NK55_RS07255	NC_023033	1498306	1498743	438	1	NA	nucleoside deaminase
120	Te_BP_1	tlr0459	NC_004113	459772	460353	582	1	NA	cytosine deaminase
120	Te_PKUAC_SCTE542	D3A95_06835	CP032152	1380995	1381432	438	1	NA	nucleoside deaminase
120	Tv_NIES_2134	CDC40_RS09990	NZ_AP018202	2048035	2048616	582	1	NA	nucleoside deaminase
121	Sl_PCC6715	BRW62_RS00850	NZ_CP018092	158546	159277	732	-1	NA	cytochrome C biogenesis protein
121	T_CL_1	FFX45_06305	CP040671	1237551	1238273	723	1	NA	cytochrome c biogenesis protein CcdA
121	T_NK55	NK55_RS09415	NC_023033	1947074	1947796	723	-1	NA	cytochrome C biogenesis protein CcdA
121	Te_BP_1	tlr0052	NC_004113	49029	49751	723	1	ccdA	c-type cytochrome biogenesis
121	Te_PKUAC_SCTE542	D3A95_09280	CP032152	1876585	1877307	723	-1	NA	cytochrome c biogenesis protein CcdA
121	Tv_NIES_2134	CDC40_RS01825	NZ_AP018202	375995	376717	723	-1	NA	cytochrome C biogenesis protein CcdA
122	Sl_PCC6715	BRW62_RS00895	NZ_CP018092	170364	170681	318	-1	NA	circadian clock protein KaiB
122	T_CL_1	FFX45_05455	CP040671	1071783	1072109	327	1	kaiB	circadian clock protein KaiB
122	T_NK55	NK55_RS08705	NC_023033	1788844	1789170	327	1	NA	circadian clock protein KaiB
122	Te_BP_1	tlr0482	NC_004113	479155	479481	327	1	kaiB	circadian clock protein KaiB
122	Te_PKUAC_SCTE542	D3A95_08530	CP032152	1713106	1713432	327	1	kaiB	circadian clock protein KaiB
122	Tv_NIES_2134	CDC40_RS01485	NZ_AP018202	305218	305544	327	1	kaiB	circadian clock protein KaiB
123	Sl_PCC6715	BRW62_RS00905	NZ_CP018092	171651	173801	2151	1	NA	HAMP domain-containing histidine kinase
123	T_CL_1	FFX45_05445	CP040671	1068551	1070707	2157	-1	NA	hypothetical protein
123	T_NK55	NK55_RS08695	NC_023033	1785660	1787786	2127	-1	NA	histidine kinase
123	Te_BP_1	tll0480	NC_004113	475949	478081	2133	-1	NA	two-component sensor histidine kinase
123	Te_PKUAC_SCTE542	D3A95_08520	CP032152	1709919	1712045	2127	-1	NA	sensor histidine kinase
123	Tv_NIES_2134	CDC40_RS01475	NZ_AP018202	302012	304144	2133	-1	NA	HAMP domain-containing histidine kinase
124	Sl_PCC6715	BRW62_RS00910	NZ_CP018092	173792	175090	1299	-1	hemL	glutamate-1-semialdehyde-2,1-aminomutase
124	T_CL_1	FFX45_05440	CP040671	1067262	1068560	1299	1	hemL	glutamate-1-semialdehyde-2,1-aminomutase
124	T_NK55	NK55_RS08690	NC_023033	1784371	1785669	1299	1	NA	glutamate-1-semialdehyde-2,1-aminomutase
124	Te_BP_1	tlr0479	NC_004113	474660	475958	1299	1	hemL	glutamate-1-semialdehyde aminotransferase
124	Te_PKUAC_SCTE542	D3A95_08515	CP032152	1708630	1709928	1299	1	hemL	glutamate-1-semialdehyde-2,1-aminomutase
124	Tv_NIES_2134	CDC40_RS01470	NZ_AP018202	300723	302021	1299	1	hemL	glutamate-1-semialdehyde-2,1-aminomutase
125	Sl_PCC6715	BRW62_RS00915	NZ_CP018092	175226	175831	606	-1	NA	heme-copper oxidase subunit III
125	T_CL_1	FFX45_03180	CP040671	628913	629518	606	1	NA	heme-copper oxidase subunit III
125	T_NK55	NK55_RS06855	NC_023033	1421527	1422132	606	-1	NA	heme-copper oxidase subunit III
125	Te_BP_1	tll2009	NC_004113	2095529	2096134	606	-1	ctaE	cytochrome c oxidase subunit III
125	Te_PKUAC_SCTE542	D3A95_02800	CP032152	570878	571483	606	1	NA	heme-copper oxidase subunit III
125	Tv_NIES_2134	CDC40_RS09595	NZ_AP018202	1971241	1971846	606	-1	NA	heme-copper oxidase subunit III
126	Sl_PCC6715	BRW62_RS00935	NZ_CP018092	179533	180135	603	1	cbiT	precorrin-6Y C5,15-methyltransferase subunit CbiT
126	T_CL_1	FFX45_07970	CP040671	1592806	1593408	603	1	cbiT	precorrin-6Y C5,15-methyltransferase subunit CbiT
126	T_NK55	NK55_RS04310	NC_023033	903656	904258	603	1	NA	precorrin-6Y C5,15-methyltransferase subunit CbiT
126	Te_BP_1	tlr1513	NC_004113	1581918	1582520	603	1	cobL	precorrin-6B methylase
126	Te_PKUAC_SCTE542	D3A95_11135	CP032152	2240654	2241256	603	-1	cbiT	precorrin-6Y C5,15-methyltransferase subunit CbiT
126	Tv_NIES_2134	CDC40_RS07080	NZ_AP018202	1459839	1460441	603	1	cbiT	precorrin-6Y C5,15-methyltransferase subunit CbiT
127	Sl_PCC6715	BRW62_RS00940	NZ_CP018092	180135	180980	846	1	rsmI	16S rRNA (cytidine(1402)-2'-O)-methyltransferase
127	T_CL_1	FFX45_07975	CP040671	1593408	1594253	846	1	rsmI	16S rRNA (cytidine(1402)-2'-O)-methyltransferase
127	T_NK55	NK55_RS04315	NC_023033	904258	905103	846	1	NA	16S rRNA (cytidine(1402)-2'-O)-methyltransferase
127	Te_BP_1	tlr1514	NC_004113	1582520	1583365	846	1	NA	tetrapyrrole methylase family protein
127	Te_PKUAC_SCTE542	D3A95_11130	CP032152	2239809	2240654	846	-1	rsmI	16S rRNA (cytidine(1402)-2'-O)-methyltransferase
127	Tv_NIES_2134	CDC40_RS07085	NZ_AP018202	1460441	1461286	846	1	rsmI	16S rRNA (cytidine(1402)-2'-O)-methyltransferase
128	Sl_PCC6715	BRW62_RS00945	NZ_CP018092	181028	182287	1260	1	NA	DUF445 family protein
128	T_CL_1	FFX45_04875	CP040671	958657	959901	1245	1	NA	DUF445 family protein
128	T_NK55	NK55_RS08160	NC_023033	1682046	1683290	1245	1	NA	DUF445 family protein
128	Te_BP_1	tlr2287	NC_004113	2378254	2379411	1158	1	NA	hypothetical protein
128	Te_PKUAC_SCTE542	D3A95_07870	CP032152	1584480	1585724	1245	1	NA	DUF445 family protein
128	Tv_NIES_2134	CDC40_RS11030	NZ_AP018202	2247175	2248419	1245	1	NA	DUF445 family protein
129	Sl_PCC6715	BRW62_RS00950	NZ_CP018092	182624	183136	513	1	NA	DUF1269 domain-containing protein
129	T_CL_1	FFX45_05755	CP040671	1127789	1128337	549	1	NA	DUF1269 domain-containing protein
129	T_NK55	NK55_RS05035	NC_023033	1052291	1052839	549	-1	NA	DUF1269 domain-containing protein
129	Te_BP_1	tll1655	NC_004113	1736783	1737331	549	-1	NA	hypothetical protein
129	Te_PKUAC_SCTE542	D3A95_03035	CP032152	623984	624532	549	-1	NA	DUF1269 domain-containing protein
129	Tv_NIES_2134	CDC40_RS07785	NZ_AP018202	1611543	1612091	549	-1	NA	DUF1269 domain-containing protein
130	Sl_PCC6715	BRW62_RS00960	NZ_CP018092	184091	184645	555	-1	NA	YqeG family HAD IIIA-type phosphatase
130	T_CL_1	FFX45_05520	CP040671	1083210	1083749	540	-1	NA	YqeG family HAD IIIA-type phosphatase
130	T_NK55	NK55_RS08770	NC_023033	1800296	1800835	540	-1	NA	YqeG family HAD IIIA-type phosphatase
130	Te_BP_1	tll0495	NC_004113	490620	491159	540	-1	NA	hypothetical protein
130	Te_PKUAC_SCTE542	D3A95_08595	CP032152	1724467	1725006	540	-1	NA	YqeG family HAD IIIA-type phosphatase
130	Tv_NIES_2134	CDC40_RS01550	NZ_AP018202	316683	317222	540	-1	NA	YqeG family HAD IIIA-type phosphatase
131	Sl_PCC6715	BRW62_RS00965	NZ_CP018092	184805	185956	1152	1	NA	M23 family metallopeptidase
131	T_CL_1	FFX45_08410	CP040671	1685105	1686259	1155	1	NA	peptidase M23
131	T_NK55	NK55_RS06045	NC_023033	1250984	1252138	1155	1	NA	M23 family metallopeptidase
131	Te_BP_1	tlr1849	NC_004113	1932653	1933807	1155	1	NA	hypothetical protein
131	Te_PKUAC_SCTE542	D3A95_10810	CP032152	2178281	2179435	1155	-1	NA	peptidase M23
131	Tv_NIES_2134	CDC40_RS08790	NZ_AP018202	1811155	1812309	1155	1	NA	M23 family metallopeptidase
132	Sl_PCC6715	BRW62_RS00970	NZ_CP018092	185988	186827	840	-1	tatC	twin-arginine translocase subunit TatC
132	T_CL_1	FFX45_01310	CP040671	278422	279240	819	1	tatC	twin-arginine translocase subunit TatC
132	T_NK55	NK55_RS11550	NC_023033	2383536	2384357	822	1	NA	twin-arginine translocase subunit TatC
132	Te_BP_1	tlr0953	NC_004113	978044	978865	822	1	NA	sec-independent protein translocase
132	Te_PKUAC_SCTE542	D3A95_04380	CP032152	873189	874001	813	-1	tatC	twin-arginine translocase subunit TatC
132	Tv_NIES_2134	CDC40_RS04780	NZ_AP018202	976193	977014	822	-1	tatC	twin-arginine translocase subunit TatC
133	Sl_PCC6715	BRW62_RS00980	NZ_CP018092	188349	189098	750	1	NA	creatininase family protein
133	T_CL_1	FFX45_09110	CP040671	1839940	1840689	750	-1	NA	creatininase family protein
133	T_NK55	NK55_RS02440	NC_023033	510486	511235	750	1	NA	creatininase family protein
133	Te_BP_1	tlr1392	NC_004113	1458550	1459299	750	1	NA	hypothetical protein
133	Te_PKUAC_SCTE542	D3A95_12840	CP032152	2601292	2602041	750	1	NA	creatininase family protein
133	Tv_NIES_2134	CDC40_RS05750	NZ_AP018202	1164681	1165430	750	-1	NA	creatininase family protein
134	Sl_PCC6715	BRW62_RS00985	NZ_CP018092	189109	189999	891	1	NA	alpha/beta fold hydrolase
134	T_CL_1	FFX45_09105	CP040671	1839055	1839939	885	-1	NA	alpha/beta fold hydrolase
134	T_NK55	NK55_RS02445	NC_023033	511236	512120	885	1	NA	alpha/beta fold hydrolase
134	Te_BP_1	tlr1393	NC_004113	1459300	1460184	885	1	NA	hydrolase
134	Te_PKUAC_SCTE542	D3A95_12845	CP032152	2602042	2602926	885	1	NA	alpha/beta fold hydrolase
134	Tv_NIES_2134	CDC40_RS05745	NZ_AP018202	1163796	1164680	885	-1	NA	alpha/beta fold hydrolase
135	Sl_PCC6715	BRW62_RS01015	NZ_CP018092	194480	194617	138	1	NA	photosystem II reaction center protein K
135	T_CL_1	FFX45_11155	CP040671	2266914	2267051	138	-1	NA	photosystem II reaction center protein K
135	T_NK55	NK55_RS01165	NC_023033	236263	236400	138	1	NA	photosystem II reaction center protein K
135	Te_BP_1	tsl0176	NC_004113	157406	157546	141	-1	psbK	photosystem II reaction center protein K
135	Te_PKUAC_SCTE542	D3A95_00975	CP032152	196111	196248	138	1	NA	photosystem II reaction center protein K
135	Tv_NIES_2134	CDC40_RS02310	NZ_AP018202	465544	465681	138	-1	NA	photosystem II reaction center protein K
136	Sl_PCC6715	BRW62_RS01040	NZ_CP018092	198351	198971	621	-1	NA	DUF541 domain-containing protein
136	T_CL_1	FFX45_09375	CP040671	1903608	1904315	708	1	NA	DUF541 domain-containing protein
136	T_NK55	NK55_RS02205	NC_023033	450701	451408	708	-1	NA	DUF541 domain-containing protein
136	Te_BP_1	tlr2401	NC_004113	2514046	2514753	708	1	NA	hypothetical protein
136	Te_PKUAC_SCTE542	D3A95_12530	CP032152	2530633	2531340	708	-1	NA	DUF541 domain-containing protein
136	Tv_NIES_2134	CDC40_RS03755	NZ_AP018202	760296	761003	708	-1	NA	DUF541 domain-containing protein
137	Sl_PCC6715	BRW62_RS01045	NZ_CP018092	199164	199808	645	-1	NA	lysozyme
137	T_CL_1	FFX45_09535	CP040671	1941797	1942465	669	-1	NA	lysozyme
137	T_NK55	NK55_RS02050	NC_023033	416332	417000	669	1	NA	peptidoglycan lytic transglycosylase
137	Te_BP_1	tll1028	NC_004113	1059236	1059904	669	-1	NA	hypothetical protein
137	Te_PKUAC_SCTE542	D3A95_12360	CP032152	2494233	2494901	669	1	NA	lysozyme
137	Tv_NIES_2134	CDC40_RS03600	NZ_AP018202	724963	725631	669	1	NA	lysozyme
138	Sl_PCC6715	BRW62_RS01050	NZ_CP018092	199826	200488	663	-1	NA	SDR family oxidoreductase
138	T_CL_1	FFX45_09540	CP040671	1942476	1943159	684	-1	NA	SDR family oxidoreductase
138	T_NK55	NK55_RS02045	NC_023033	415659	416321	663	1	NA	SDR family oxidoreductase
138	Te_BP_1	tll1029	NC_004113	1059915	1060601	687	-1	ycf39	hypothetical protein
138	Te_PKUAC_SCTE542	D3A95_12355	CP032152	2493539	2494222	684	1	NA	SDR family oxidoreductase
138	Tv_NIES_2134	CDC40_RS03595	NZ_AP018202	724266	724952	687	1	NA	SDR family oxidoreductase
139	Sl_PCC6715	BRW62_RS01075	NZ_CP018092	205194	205907	714	1	queC	7-cyano-7-deazaguanine synthase QueC
139	T_CL_1	FFX45_07170	CP040671	1424050	1424751	702	1	queC	7-cyano-7-deazaguanine synthase QueC
139	T_NK55	NK55_RS05425	NC_023033	1127702	1128403	702	1	NA	7-cyano-7-deazaguanine synthase QueC
139	Te_BP_1	tlr1732	NC_004113	1812533	1813234	702	1	NA	transcriptional regulator ExsB-like protein
139	Te_PKUAC_SCTE542	D3A95_10135	CP032152	2029917	2030618	702	1	queC	7-cyano-7-deazaguanine synthase QueC
139	Tv_NIES_2134	CDC40_RS08180	NZ_AP018202	1687281	1687982	702	1	queC	7-cyano-7-deazaguanine synthase QueC
140	Sl_PCC6715	BRW62_RS01090	NZ_CP018092	210591	211040	450	1	NA	hypothetical protein
140	T_CL_1	FFX45_08690	CP040671	1762905	1763354	450	1	NA	hypothetical protein
140	T_NK55	NK55_RS01075	NC_023033	216415	216864	450	-1	NA	hypothetical protein
140	Te_BP_1	tlr0194	NC_004113	176999	177448	450	1	NA	hypothetical protein
140	Te_PKUAC_SCTE542	D3A95_00135	CP032152	25034	25483	450	-1	NA	hypothetical protein
140	Tv_NIES_2134	CDC40_RS02405	NZ_AP018202	485138	485587	450	1	NA	hypothetical protein
141	Sl_PCC6715	BRW62_RS01100	NZ_CP018092	212204	212779	576	1	NA	peptidase
141	T_CL_1	FFX45_08700	CP040671	1764509	1765099	591	1	NA	PepSY domain-containing protein
141	T_NK55	NK55_RS01065	NC_023033	214670	215260	591	-1	NA	hypothetical protein
141	Te_BP_1	tlr0196	NC_004113	178603	179193	591	1	NA	hypothetical protein
141	Te_PKUAC_SCTE542	D3A95_00125	CP032152	23292	23882	591	-1	NA	PepSY domain-containing protein
141	Tv_NIES_2134	CDC40_RS02415	NZ_AP018202	486742	487332	591	1	NA	PepSY domain-containing protein
142	Sl_PCC6715	BRW62_RS01110	NZ_CP018092	213557	213889	333	1	NA	hypothetical protein
142	T_CL_1	FFX45_08710	CP040671	1765445	1765771	327	1	NA	hypothetical protein
142	T_NK55	NK55_RS01055	NC_023033	213995	214321	327	-1	NA	hypothetical protein
142	Te_BP_1	tlr0198	NC_004113	179535	179861	327	1	NA	hypothetical protein
142	Te_PKUAC_SCTE542	D3A95_00115	CP032152	22622	22945	324	-1	NA	hypothetical protein
142	Tv_NIES_2134	CDC40_RS02425	NZ_AP018202	487674	488000	327	1	NA	hypothetical protein
143	Sl_PCC6715	BRW62_RS01115	NZ_CP018092	213940	214524	585	-1	NA	hypothetical protein
143	T_CL_1	FFX45_05535	CP040671	1085178	1085765	588	1	NA	hypothetical protein
143	T_NK55	NK55_RS08785	NC_023033	1802450	1803034	585	1	NA	hypothetical protein
143	Te_BP_1	tlr0498	NC_004113	492763	493347	585	1	NA	hypothetical protein
143	Te_PKUAC_SCTE542	D3A95_08610	CP032152	1726695	1727279	585	1	NA	hypothetical protein
143	Tv_NIES_2134	CDC40_RS01565	NZ_AP018202	318826	319410	585	1	NA	hypothetical protein
144	Sl_PCC6715	BRW62_RS01135	NZ_CP018092	220320	221876	1557	-1	NA	protein kinase
144	T_CL_1	FFX45_11360	CP040671	2311469	2313037	1569	-1	NA	serine/threonine protein kinase
144	T_NK55	NK55_RS03215	NC_023033	663469	665043	1575	-1	NA	protein kinase
144	Te_BP_1	tlr1326	NC_004113	1376452	1378026	1575	1	NA	serine/threonine protein kinase
144	Te_PKUAC_SCTE542	D3A95_00365	CP032152	78622	80196	1575	-1	NA	serine/threonine protein kinase
144	Tv_NIES_2134	CDC40_RS06090	NZ_AP018202	1244886	1246460	1575	-1	NA	protein kinase
145	Sl_PCC6715	BRW62_RS01140	NZ_CP018092	222247	222885	639	1	NA	HD domain-containing protein
145	T_CL_1	FFX45_11365	CP040671	2313391	2314041	651	1	NA	HD domain-containing protein
145	T_NK55	NK55_RS03220	NC_023033	665403	666053	651	1	NA	HD domain-containing protein
145	Te_BP_1	tll1325	NC_004113	1375506	1376156	651	-1	NA	hypothetical protein
145	Te_PKUAC_SCTE542	D3A95_00370	CP032152	80577	81227	651	1	NA	HD domain-containing protein
145	Tv_NIES_2134	CDC40_RS06095	NZ_AP018202	1246758	1247408	651	1	NA	HD domain-containing protein
146	Sl_PCC6715	BRW62_RS01145	NZ_CP018092	222939	223784	846	1	NA	transporter
146	T_CL_1	FFX45_11370	CP040671	2314087	2314932	846	1	NA	ABC transporter permease
146	T_NK55	NK55_RS03225	NC_023033	666099	666944	846	1	NA	ABC transporter permease
146	Te_BP_1	tll1324	NC_004113	1374602	1375447	846	-1	ycf38	hypothetical protein
146	Te_PKUAC_SCTE542	D3A95_00375	CP032152	81272	82117	846	1	NA	ABC transporter permease
146	Tv_NIES_2134	CDC40_RS06100	NZ_AP018202	1247467	1248312	846	1	NA	transporter
147	Sl_PCC6715	BRW62_RS01155	NZ_CP018092	225737	226381	645	-1	phoU	phosphate signaling complex protein PhoU
147	T_CL_1	FFX45_11380	CP040671	2316939	2317613	675	-1	phoU	phosphate signaling complex protein PhoU
147	T_NK55	NK55_RS03240	NC_023033	668950	669600	651	-1	NA	phosphate signaling complex protein PhoU
147	Te_BP_1	tsr1321	NC_004113	1372161	1372292	132	1	NA	phosphate transporter PhoU
147	Te_PKUAC_SCTE542	D3A95_00385	CP032152	84121	84843	723	-1	phoU	phosphate transport system regulatory protein PhoU
147	Tv_NIES_2134	CDC40_RS06110	NZ_AP018202	1250319	1250561	243	-1	NA	hypothetical protein
148	Sl_PCC6715	BRW62_RS01160	NZ_CP018092	226426	227319	894	-1	NA	cation transporter
148	T_CL_1	FFX45_08950	CP040671	1805859	1806710	852	1	NA	cation transporter
148	T_NK55	NK55_RS02510	NC_023033	524765	525655	891	-1	NA	cation transporter
148	Te_BP_1	tll1405	NC_004113	1472810	1473643	834	-1	NA	cation efflux system protein
148	Te_PKUAC_SCTE542	D3A95_12965	CP032152	2629323	2630174	852	-1	NA	cation transporter
148	Tv_NIES_2134	CDC40_RS05680	NZ_AP018202	1150314	1151171	858	1	NA	cation transporter
149	Sl_PCC6715	BRW62_RS01195	NZ_CP018092	231829	232899	1071	-1	NA	phosphotransacetylase family protein
149	T_CL_1	FFX45_03080	CP040671	611106	612173	1068	-1	NA	phosphotransacetylase family protein
149	T_NK55	NK55_RS06940	NC_023033	1435439	1436506	1068	1	NA	phosphotransacetylase family protein
149	Te_BP_1	tlr2026	NC_004113	2109457	2110524	1068	1	NA	hypothetical protein
149	Te_PKUAC_SCTE542	D3A95_02715	CP032152	556530	557597	1068	-1	NA	hypothetical protein
149	Tv_NIES_2134	CDC40_RS09680	NZ_AP018202	1985162	1986229	1068	1	NA	phosphotransacetylase family protein
150	Sl_PCC6715	BRW62_RS01205	NZ_CP018092	233464	233790	327	1	NA	DUF760 domain-containing protein
150	T_CL_1	FFX45_03090	CP040671	612732	613064	333	1	NA	DUF760 domain-containing protein
150	T_NK55	NK55_RS06930	NC_023033	1434541	1434873	333	-1	NA	DUF760 domain-containing protein
150	Te_BP_1	tll2024	NC_004113	2108563	2108895	333	-1	NA	hypothetical protein
150	Te_PKUAC_SCTE542	D3A95_02725	CP032152	558156	558488	333	1	NA	DUF760 domain-containing protein
150	Tv_NIES_2134	CDC40_RS09670	NZ_AP018202	1984268	1984600	333	-1	NA	DUF760 domain-containing protein
151	Sl_PCC6715	BRW62_RS01210	NZ_CP018092	233805	234233	429	1	NA	hypothetical protein
151	T_CL_1	FFX45_03095	CP040671	613098	613526	429	1	NA	hypothetical protein
151	T_NK55	NK55_RS06925	NC_023033	1434070	1434450	381	-1	NA	hypothetical protein
151	Te_BP_1	tll2023	NC_004113	2108101	2108529	429	-1	NA	hypothetical protein
151	Te_PKUAC_SCTE542	D3A95_02730	CP032152	558522	558950	429	1	NA	hypothetical protein
151	Tv_NIES_2134	CDC40_RS09665	NZ_AP018202	1983806	1984234	429	-1	NA	hypothetical protein
152	Sl_PCC6715	BRW62_RS01230	NZ_CP018092	236578	237000	423	-1	NA	nuclear transport factor 2
152	T_CL_1	FFX45_10630	CP040671	2155980	2156396	417	-1	NA	nuclear transport factor 2 family protein
152	T_NK55	NK55_RS03520	NC_023033	725551	725961	411	1	NA	orange carotenoid-binding protein subunit beta OcpB
152	Te_BP_1	tll1268	NC_004113	1315512	1315928	417	-1	NA	hypothetical protein
152	Te_PKUAC_SCTE542	D3A95_01530	CP032152	313746	314162	417	1	NA	nuclear transport factor 2 family protein
152	Tv_NIES_2134	CDC40_RS06390	NZ_AP018202	1307427	1307843	417	1	NA	nuclear transport factor 2 family protein
153	Sl_PCC6715	BRW62_RS01235	NZ_CP018092	237080	237577	498	-1	NA	Orange carotenoid protein
153	T_CL_1	FFX45_10635	CP040671	2156476	2156973	498	-1	NA	Orange carotenoid protein
153	T_NK55	NK55_RS03515	NC_023033	724976	725473	498	1	NA	orange carotenoid-binding protein subunit alpha OcpA
153	Te_BP_1	tll1269	NC_004113	1316006	1316503	498	-1	NA	hypothetical protein
153	Te_PKUAC_SCTE542	D3A95_01525	CP032152	313169	313666	498	1	NA	Orange carotenoid protein
153	Tv_NIES_2134	CDC40_RS06385	NZ_AP018202	1306852	1307349	498	1	NA	Orange carotenoid protein
154	Sl_PCC6715	BRW62_RS01240	NZ_CP018092	237775	238866	1092	1	NA	glycosyl transferase
154	T_CL_1	FFX45_10640	CP040671	2157267	2158364	1098	1	NA	glycosyl transferase
154	T_NK55	NK55_RS03510	NC_023033	723617	724711	1095	-1	NA	hypothetical protein
154	Te_BP_1	tlr1270	NC_004113	1316775	1317869	1095	1	NA	hypothetical protein
154	Te_PKUAC_SCTE542	D3A95_01520	CP032152	311690	312781	1092	-1	NA	glycosyl transferase
154	Tv_NIES_2134	CDC40_RS06380	NZ_AP018202	1305486	1306580	1095	-1	NA	glycosyl transferase
155	Sl_PCC6715	BRW62_RS01255	NZ_CP018092	241575	242822	1248	-1	NA	DUF697 domain-containing protein
155	T_CL_1	FFX45_08800	CP040671	1783402	1784649	1248	1	NA	DUF697 domain-containing protein
155	T_NK55	NK55_RS12310	NC_023033	546780	548000	1221	-1	NA	DUF697 domain-containing protein
155	Te_BP_1	tll1435	NC_004113	1495194	1496414	1221	-1	NA	hypothetical protein
155	Te_PKUAC_SCTE542	D3A95_00025	CP032152	2795	4042	1248	-1	NA	DUF697 domain-containing protein
155	Tv_NIES_2134	CDC40_RS05530	NZ_AP018202	1127594	1128814	1221	1	NA	DUF697 domain-containing protein
156	Sl_PCC6715	BRW62_RS01275	NZ_CP018092	245424	246038	615	-1	NA	leucyl/phenylalanyl-tRNA--protein transferase
156	T_CL_1	FFX45_01695	CP040671	346636	347250	615	-1	NA	leucyl/phenylalanyl-tRNA--protein transferase
156	T_NK55	NK55_RS11075	NC_023033	2276209	2276799	591	1	NA	leucyl/phenylalanyl-tRNA--protein transferase
156	Te_BP_1	tlr0861	NC_004113	880397	881011	615	1	aat	leucyl/phenylalanyl-tRNA--protein transferase
156	Te_PKUAC_SCTE542	D3A95_03985	CP032152	801268	801882	615	1	NA	leucyl/phenylalanyl-tRNA--protein transferase
156	Tv_NIES_2134	CDC40_RS05255	NZ_AP018202	1077918	1078532	615	-1	NA	leucyl/phenylalanyl-tRNA--protein transferase
157	Sl_PCC6715	BRW62_RS01280	NZ_CP018092	246096	246626	531	1	NA	pentapeptide repeat-containing protein
157	T_CL_1	FFX45_01700	CP040671	347266	347802	537	1	NA	pentapeptide repeat-containing protein
157	T_NK55	NK55_RS11070	NC_023033	2275633	2276160	528	-1	NA	pentapeptide repeat-containing protein
157	Te_BP_1	tll0860	NC_004113	879845	880381	537	-1	NA	hypothetical protein
157	Te_PKUAC_SCTE542	D3A95_03980	CP032152	800716	801252	537	-1	NA	pentapeptide repeat-containing protein
157	Tv_NIES_2134	CDC40_RS05260	NZ_AP018202	1078548	1079084	537	1	NA	pentapeptide repeat-containing protein
158	Sl_PCC6715	BRW62_RS01285	NZ_CP018092	246716	247705	990	1	NA	NAD-dependent epimerase/dehydratase family protein
158	T_CL_1	FFX45_01705	CP040671	347923	348915	993	1	NA	NAD-dependent epimerase/dehydratase family protein
158	T_NK55	NK55_RS11065	NC_023033	2274535	2275527	993	-1	NA	NAD-dependent epimerase/dehydratase family protein
158	Te_BP_1	tll0859	NC_004113	878747	879739	993	-1	ycf39	chaperon-like protein for quinone binding in photosystem II
158	Te_PKUAC_SCTE542	D3A95_03975	CP032152	799607	800599	993	-1	NA	NAD-dependent epimerase/dehydratase family protein
158	Tv_NIES_2134	CDC40_RS05265	NZ_AP018202	1079190	1080182	993	1	NA	NAD-dependent epimerase/dehydratase family protein
159	Sl_PCC6715	BRW62_RS01290	NZ_CP018092	247714	248634	921	1	ppnK	NAD(+) kinase
159	T_CL_1	FFX45_01710	CP040671	348924	349847	924	1	NA	NAD(+) kinase
159	T_NK55	NK55_RS11060	NC_023033	2273603	2274526	924	-1	ppnK	NAD(+) kinase
159	Te_BP_1	tll0858	NC_004113	877815	878738	924	-1	ppnK	inorganic polyphosphate/ATP-NAD kinase
159	Te_PKUAC_SCTE542	D3A95_03970	CP032152	798678	799598	921	-1	NA	NAD(+) kinase
159	Tv_NIES_2134	CDC40_RS05270	NZ_AP018202	1080191	1081114	924	1	NA	NAD(+) kinase
160	Sl_PCC6715	BRW62_RS01295	NZ_CP018092	248631	250736	2106	1	ligA	NAD-dependent DNA ligase LigA
160	T_CL_1	FFX45_01715	CP040671	349853	351925	2073	1	ligA	NAD-dependent DNA ligase LigA
160	T_NK55	NK55_RS11055	NC_023033	2271531	2273597	2067	-1	ligA	NAD-dependent DNA ligase LigA
160	Te_BP_1	tll0857	NC_004113	875740	877809	2070	-1	ligA	NAD-dependent DNA ligase LigA
160	Te_PKUAC_SCTE542	D3A95_03965	CP032152	796593	798638	2046	-1	ligA	NAD-dependent DNA ligase LigA
160	Tv_NIES_2134	CDC40_RS05275	NZ_AP018202	1081120	1083189	2070	1	ligA	NAD-dependent DNA ligase LigA
161	Sl_PCC6715	BRW62_RS01300	NZ_CP018092	250828	251556	729	1	NA	4-vinyl reductase
161	T_CL_1	FFX45_01720	CP040671	352038	352769	732	1	NA	4-vinyl reductase
161	T_NK55	NK55_RS11050	NC_023033	2270683	2271414	732	-1	NA	4-vinyl reductase
161	Te_BP_1	tll0856	NC_004113	874896	875627	732	-1	NA	hypothetical protein
161	Te_PKUAC_SCTE542	D3A95_03960	CP032152	795755	796486	732	-1	NA	4-vinyl reductase
161	Tv_NIES_2134	CDC40_RS05280	NZ_AP018202	1083302	1084033	732	1	NA	hypothetical protein
162	Sl_PCC6715	BRW62_RS01320	NZ_CP018092	254260	254904	645	1	NA	alpha/beta fold hydrolase
162	T_CL_1	FFX45_07140	CP040671	1418248	1418883	636	1	NA	alpha/beta fold hydrolase
162	T_NK55	NK55_RS05395	NC_023033	1121526	1122161	636	1	NA	alpha/beta fold hydrolase
162	Te_BP_1	tlr1725	NC_004113	1806313	1806948	636	1	NA	hypothetical protein
162	Te_PKUAC_SCTE542	D3A95_10105	CP032152	2024111	2024746	636	1	NA	alpha/beta fold hydrolase
162	Tv_NIES_2134	CDC40_RS08145	NZ_AP018202	1681077	1681712	636	1	NA	alpha/beta fold hydrolase
163	Sl_PCC6715	BRW62_RS01330	NZ_CP018092	257593	258822	1230	1	NA	MFS transporter
163	T_CL_1	FFX45_04485	CP040671	878444	879670	1227	-1	NA	MFS transporter
163	T_NK55	NK55_RS07900	NC_023033	1627704	1628930	1227	1	NA	MFS transporter
163	Te_BP_1	tlr2241	NC_004113	2325214	2326440	1227	1	NA	multidrug resistance protein
163	Te_PKUAC_SCTE542	D3A95_07560	CP032152	1518425	1519651	1227	1	NA	MFS transporter
163	Tv_NIES_2134	CDC40_RS10770	NZ_AP018202	2194970	2196196	1227	1	NA	MFS transporter
164	Sl_PCC6715	BRW62_RS01340	NZ_CP018092	260635	261357	723	1	NA	Stp1/IreP family PP2C-type Ser/Thr phosphatase
164	T_CL_1	FFX45_04475	CP040671	875919	876641	723	-1	NA	Stp1/IreP family PP2C-type Ser/Thr phosphatase
164	T_NK55	NK55_RS07910	NC_023033	1630822	1631544	723	1	NA	Stp1/IreP family PP2C-type Ser/Thr phosphatase
164	Te_BP_1	tlr2243	NC_004113	2328327	2329049	723	1	NA	protein serin-threonin phosphatase
164	Te_PKUAC_SCTE542	D3A95_07570	CP032152	1521453	1522175	723	1	NA	Stp1/IreP family PP2C-type Ser/Thr phosphatase
164	Tv_NIES_2134	CDC40_RS10780	NZ_AP018202	2198082	2198804	723	1	NA	Stp1/IreP family PP2C-type Ser/Thr phosphatase
165	Sl_PCC6715	BRW62_RS01345	NZ_CP018092	261354	262076	723	-1	NA	circadian clock protein KaiB
165	T_CL_1	FFX45_00790	CP040671	160417	161220	804	1	NA	circadian clock protein KaiB
165	T_NK55	NK55_RS11955	NC_023033	2463285	2464013	729	-1	NA	KaiB domain protein
165	Te_BP_1	tll0553	NC_004113	551746	552549	804	-1	NA	circadian oscillation regulator
165	Te_PKUAC_SCTE542	D3A95_04890	CP032152	990097	990903	807	-1	NA	circadian clock protein KaiB
165	Tv_NIES_2134	CDC40_RS04085	NZ_AP018202	827926	828729	804	-1	NA	circadian clock protein KaiB
166	Sl_PCC6715	BRW62_RS01355	NZ_CP018092	263584	264363	780	-1	NA	DNA/RNA nuclease SfsA
166	T_CL_1	FFX45_06980	CP040671	1385579	1386304	726	1	sfsA	DNA/RNA nuclease SfsA
166	T_NK55	NK55_RS05255	NC_023033	1094679	1095404	726	1	NA	DNA/RNA nuclease SfsA
166	Te_BP_1	tlr1697	NC_004113	1779301	1780026	726	1	NA	sugar fermentation stimulation protein A
166	Te_PKUAC_SCTE542	D3A95_03270	CP032152	667270	667995	726	1	sfsA	DNA/RNA nuclease SfsA
166	Tv_NIES_2134	CDC40_RS08005	NZ_AP018202	1654058	1654783	726	1	sfsA	DNA/RNA nuclease SfsA
167	Sl_PCC6715	BRW62_RS01360	NZ_CP018092	264712	265047	336	1	NA	rubredoxin
167	T_CL_1	FFX45_06975	CP040671	1384898	1385233	336	-1	NA	rubredoxin
167	T_NK55	NK55_RS05250	NC_023033	1093997	1094332	336	-1	NA	rubredoxin
167	Te_BP_1	tll1696	NC_004113	1778620	1778955	336	-1	rub	rubredoxin
167	Te_PKUAC_SCTE542	D3A95_03265	CP032152	666588	666923	336	-1	NA	rubredoxin
167	Tv_NIES_2134	CDC40_RS08000	NZ_AP018202	1653377	1653712	336	-1	NA	rubredoxin
168	Sl_PCC6715	BRW62_RS01365	NZ_CP018092	265037	266062	1026	1	NA	photosynthesis system II assembly factor Ycf48
168	T_CL_1	FFX45_06970	CP040671	1383865	1384908	1044	-1	NA	photosynthesis system II assembly factor Ycf48
168	T_NK55	NK55_RS05245	NC_023033	1092964	1093971	1008	-1	NA	photosynthesis system II assembly factor Ycf48
168	Te_BP_1	tll1695	NC_004113	1777587	1778630	1044	-1	ycf48	hypothetical protein
168	Te_PKUAC_SCTE542	D3A95_03260	CP032152	665567	666598	1032	-1	NA	photosynthesis system II assembly factor Ycf48
168	Tv_NIES_2134	CDC40_RS07995	NZ_AP018202	1652344	1653387	1044	-1	NA	photosynthesis system II assembly factor Ycf48
169	Sl_PCC6715	BRW62_RS01370	NZ_CP018092	266161	266925	765	1	NA	response regulator transcription factor
169	T_CL_1	FFX45_12915	CP040671	2633997	2634767	771	1	NA	response regulator transcription factor
169	T_NK55	NK55_RS12125	NC_023033	2506222	2506992	771	1	NA	response regulator transcription factor
169	Te_BP_1	tlr0589	NC_004113	596142	596912	771	1	NA	two-component response regulator
169	Te_PKUAC_SCTE542	D3A95_05160	CP032152	1051941	1052711	771	1	NA	DNA-binding response regulator
169	Tv_NIES_2134	CDC40_RS04250	NZ_AP018202	866423	867193	771	1	NA	response regulator transcription factor
170	Sl_PCC6715	BRW62_RS01395	NZ_CP018092	270603	271301	699	1	NA	MBL fold metallo-hydrolase
170	T_CL_1	FFX45_08585	CP040671	1736156	1736854	699	1	NA	MBL fold metallo-hydrolase
170	T_NK55	NK55_RS04700	NC_023033	972914	973612	699	-1	NA	MBL fold metallo-hydrolase
170	Te_BP_1	tlr1626	NC_004113	1699389	1700087	699	1	NA	hypothetical protein
170	Te_PKUAC_SCTE542	D3A95_10615	CP032152	2125957	2126655	699	-1	NA	MBL fold metallo-hydrolase
170	Tv_NIES_2134	CDC40_RS07465	NZ_AP018202	1529127	1529825	699	-1	NA	MBL fold metallo-hydrolase
171	Sl_PCC6715	BRW62_RS01400	NZ_CP018092	271351	271878	528	1	NA	rhodanese-like domain-containing protein
171	T_CL_1	FFX45_08590	CP040671	1736918	1737460	543	1	NA	rhodanese-like domain-containing protein
171	T_NK55	NK55_RS04695	NC_023033	972313	972846	534	-1	NA	rhodanese-like domain-containing protein
171	Te_BP_1	tlr1627	NC_004113	1700149	1700697	549	1	NA	hypothetical protein
171	Te_PKUAC_SCTE542	D3A95_10610	CP032152	2125351	2125899	549	-1	NA	DUF2892 domain-containing protein
171	Tv_NIES_2134	CDC40_RS07460	NZ_AP018202	1528517	1529065	549	-1	NA	rhodanese-like domain-containing protein
172	Sl_PCC6715	BRW62_RS01415	NZ_CP018092	274507	275064	558	-1	NA	F0F1 ATP synthase subunit delta
172	T_CL_1	FFX45_03715	CP040671	725436	725993	558	1	NA	F0F1 ATP synthase subunit delta
172	T_NK55	NK55_RS07115	NC_023033	1467960	1468517	558	1	NA	F0F1 ATP synthase subunit delta
172	Te_BP_1	tlr0434	NC_004113	429167	429724	558	1	atpD	ATP synthase F0F1 subunit delta
172	Te_PKUAC_SCTE542	D3A95_06690	CP032152	1348877	1349434	558	1	NA	F0F1 ATP synthase subunit delta
172	Tv_NIES_2134	CDC40_RS09860	NZ_AP018202	2018264	2018821	558	1	NA	F0F1 ATP synthase subunit delta
173	Sl_PCC6715	BRW62_RS01425	NZ_CP018092	275603	276019	417	-1	NA	F0F1 ATP synthase subunit B'
173	T_CL_1	FFX45_03705	CP040671	724481	724897	417	1	NA	F0F1 ATP synthase subunit B'
173	T_NK55	NK55_RS07105	NC_023033	1467005	1467421	417	1	NA	F0F1 ATP synthase subunit B'
173	Te_BP_1	tlr0432	NC_004113	428212	428628	417	1	atpG	ATP synthase F0F1 subunit B'
173	Te_PKUAC_SCTE542	D3A95_06680	CP032152	1347923	1348339	417	1	NA	F0F1 ATP synthase subunit B'
173	Tv_NIES_2134	CDC40_RS09850	NZ_AP018202	2017309	2017725	417	1	NA	ATP synthase subunit b'
174	Sl_PCC6715	BRW62_RS01430	NZ_CP018092	276090	276338	249	-1	atpE	ATP synthase F0 subunit C
174	T_CL_1	FFX45_03700	CP040671	724171	724419	249	1	atpE	ATP synthase F0 subunit C
174	T_NK55	NK55_RS07100	NC_023033	1466695	1466943	249	1	NA	ATP synthase F0 subunit C
174	Te_BP_1	tlr0431	NC_004113	427851	428150	300	1	atpH	ATP synthase F0F1 subunit C
174	Te_PKUAC_SCTE542	D3A95_06675	CP032152	1347612	1347860	249	1	NA	ATP synthase subunit C
174	Tv_NIES_2134	CDC40_RS09845	NZ_AP018202	2016999	2017247	249	1	atpE	ATP synthase F0 subunit C
175	Sl_PCC6715	BRW62_RS01435	NZ_CP018092	276411	277169	759	-1	NA	F0F1 ATP synthase subunit A
175	T_CL_1	FFX45_03695	CP040671	723339	724097	759	1	NA	F0F1 ATP synthase subunit A
175	T_NK55	NK55_RS07095	NC_023033	1465853	1466611	759	1	NA	F0F1 ATP synthase subunit A
175	Te_BP_1	tlr0430	NC_004113	427060	427818	759	1	atpI	ATP synthase F0F1 subunit A
175	Te_PKUAC_SCTE542	D3A95_06670	CP032152	1346780	1347538	759	1	NA	F0F1 ATP synthase subunit A
175	Tv_NIES_2134	CDC40_RS09840	NZ_AP018202	2016157	2016915	759	1	NA	F0F1 ATP synthase subunit A
176	Sl_PCC6715	BRW62_RS01440	NZ_CP018092	277210	277680	471	-1	NA	ATP synthase subunit I
176	T_CL_1	FFX45_03690	CP040671	722827	723297	471	1	NA	ATP synthase subunit I
176	T_NK55	NK55_RS07090	NC_023033	1465464	1465811	348	1	NA	F0 ATP synthase complex locus membrane protein AtpI
176	Te_BP_1	tlr0429	NC_004113	426563	427018	456	1	atp1	H+-transporting ATP synthase chain
176	Te_PKUAC_SCTE542	D3A95_06665	CP032152	1346268	1346738	471	1	NA	ATP synthase subunit I
176	Tv_NIES_2134	CDC40_RS09835	NZ_AP018202	2015660	2016115	456	1	NA	ATP synthase subunit I
177	Sl_PCC6715	BRW62_RS01450	NZ_CP018092	278191	278571	381	-1	NA	STAS domain-containing protein
177	T_CL_1	FFX45_03680	CP040671	721924	722301	378	1	NA	STAS domain-containing protein
177	T_NK55	NK55_RS07080	NC_023033	1464456	1464836	381	1	NA	STAS domain-containing protein
177	Te_BP_1	tsr0427	NC_004113	425781	426041	261	1	NA	anti-sigma f factor
177	Te_PKUAC_SCTE542	D3A95_06655	CP032152	1345368	1345745	378	1	NA	anti-sigma factor antagonist
177	Tv_NIES_2134	CDC40_RS09825	NZ_AP018202	2014806	2015138	333	1	NA	STAS domain-containing protein
178	Sl_PCC6715	BRW62_RS01455	NZ_CP018092	278850	279152	303	1	NA	hypothetical protein
178	T_CL_1	FFX45_03675	CP040671	721445	721762	318	-1	NA	hypothetical protein
178	T_NK55	NK55_RS07075	NC_023033	1463964	1464281	318	-1	NA	hypothetical protein
178	Te_BP_1	tll0426	NC_004113	425169	425486	318	-1	NA	hypothetical protein
178	Te_PKUAC_SCTE542	D3A95_06650	CP032152	1344876	1345193	318	-1	NA	hypothetical protein
178	Tv_NIES_2134	CDC40_RS09820	NZ_AP018202	2014266	2014583	318	-1	NA	hypothetical protein
179	Sl_PCC6715	BRW62_RS01465	NZ_CP018092	280703	281530	828	1	map	type I methionyl aminopeptidase
179	T_CL_1	FFX45_03665	CP040671	719084	719908	825	-1	map	type I methionyl aminopeptidase
179	T_NK55	NK55_RS07065	NC_023033	1461556	1462380	825	-1	NA	type I methionyl aminopeptidase
179	Te_BP_1	tll0424	NC_004113	422776	423600	825	-1	NA	methionine aminopeptidase
179	Te_PKUAC_SCTE542	D3A95_06640	CP032152	1342516	1343340	825	-1	map	type I methionyl aminopeptidase
179	Tv_NIES_2134	CDC40_RS09810	NZ_AP018202	2011873	2012697	825	-1	map	type I methionyl aminopeptidase
180	Sl_PCC6715	BRW62_RS01470	NZ_CP018092	281533	282090	558	1	NA	NUDIX hydrolase
180	T_CL_1	FFX45_03660	CP040671	718530	719078	549	-1	NA	NUDIX hydrolase
180	T_NK55	NK55_RS07060	NC_023033	1461002	1461550	549	-1	NA	NUDIX hydrolase
180	Te_BP_1	tll0423	NC_004113	422222	422770	549	-1	NA	hypothetical protein
180	Te_PKUAC_SCTE542	D3A95_06635	CP032152	1341963	1342490	528	-1	NA	NUDIX hydrolase
180	Tv_NIES_2134	CDC40_RS09805	NZ_AP018202	2011319	2011867	549	-1	NA	NUDIX hydrolase
181	Sl_PCC6715	BRW62_RS01475	NZ_CP018092	282203	282754	552	1	NA	spore germination protein
181	T_CL_1	FFX45_11010	CP040671	2236291	2236836	546	1	NA	spore germination protein
181	T_NK55	NK55_RS03735	NC_023033	764902	765537	636	-1	NA	hypothetical protein
181	Te_BP_1	tlr0254	NC_004113	239421	239966	546	1	NA	hypothetical protein
181	Te_PKUAC_SCTE542	D3A95_01115	CP032152	224513	225058	546	-1	NA	spore germination protein
181	Tv_NIES_2134	CDC40_RS02715	NZ_AP018202	542455	543000	546	1	NA	spore germination protein
182	Sl_PCC6715	BRW62_RS01485	NZ_CP018092	284005	285000	996	-1	NA	DMT family transporter
182	T_CL_1	FFX45_02155	CP040671	428255	429253	999	1	NA	DMT family transporter
182	T_NK55	NK55_RS10580	NC_023033	2184362	2185363	1002	-1	NA	DMT family transporter
182	Te_BP_1	tll0772	NC_004113	802493	803494	1002	-1	NA	hypothetical protein
182	Te_PKUAC_SCTE542	D3A95_03535	CP032152	720622	721623	1002	-1	NA	DMT family transporter
182	Tv_NIES_2134	CDC40_RS01290	NZ_AP018202	255166	256167	1002	1	NA	DMT family transporter
183	Sl_PCC6715	BRW62_RS01490	NZ_CP018092	285156	286127	972	-1	NA	protoheme IX farnesyltransferase
183	T_CL_1	FFX45_02830	CP040671	558230	559183	954	-1	NA	protoheme IX farnesyltransferase
183	T_NK55	NK55_RS06255	NC_023033	1301370	1302323	954	-1	NA	protoheme IX farnesyltransferase
183	Te_BP_1	tll1893	NC_004113	1980119	1981132	1014	-1	ctaB	protoheme IX farnesyltransferase
183	Te_PKUAC_SCTE542	D3A95_06055	CP032152	1235082	1236035	954	1	NA	protoheme IX farnesyltransferase
183	Tv_NIES_2134	CDC40_RS09015	NZ_AP018202	1858601	1859614	1014	-1	NA	protoheme IX farnesyltransferase
184	Sl_PCC6715	BRW62_RS01495	NZ_CP018092	286148	287113	966	-1	NA	heme A synthase
184	T_CL_1	FFX45_02835	CP040671	559201	560124	924	-1	NA	heme A synthase
184	T_NK55	NK55_RS06260	NC_023033	1302341	1303264	924	-1	NA	heme A synthase
184	Te_BP_1	tll1894	NC_004113	1981069	1982013	945	-1	NA	hypothetical protein
184	Te_PKUAC_SCTE542	D3A95_06050	CP032152	1234141	1235064	924	1	NA	heme A synthase
184	Tv_NIES_2134	CDC40_RS09020	NZ_AP018202	1859551	1860495	945	-1	NA	heme A synthase
185	Sl_PCC6715	BRW62_RS01510	NZ_CP018092	290245	290607	363	-1	NA	single-stranded DNA-binding protein
185	T_CL_1	FFX45_07845	CP040671	1566005	1566367	363	1	NA	single-stranded DNA-binding protein
185	T_NK55	NK55_RS04215	NC_023033	880654	881016	363	1	NA	single-stranded DNA-binding protein
185	Te_BP_1	tlr1490	NC_004113	1555973	1556335	363	1	ssb	single-stranded DNA-binding protein
185	Te_PKUAC_SCTE542	D3A95_11245	CP032152	2263967	2264329	363	-1	NA	single-stranded DNA-binding protein
185	Tv_NIES_2134	CDC40_RS07050	NZ_AP018202	1454472	1454834	363	-1	NA	single-stranded DNA-binding protein
186	Sl_PCC6715	BRW62_RS01520	NZ_CP018092	295048	295566	519	-1	NA	DNA recombination-mediator protein A
186	T_CL_1	FFX45_01685	CP040671	345045	345563	519	-1	NA	DNA recombination-mediator protein A
186	T_NK55	NK55_RS11085	NC_023033	2277905	2278423	519	1	NA	hypothetical protein
186	Te_BP_1	tlr0863	NC_004113	882287	882655	369	1	NA	hypothetical protein
186	Te_PKUAC_SCTE542	D3A95_03990	CP032152	802184	802702	519	1	NA	DNA recombination-mediator protein A
186	Tv_NIES_2134	CDC40_RS05245	NZ_AP018202	1076275	1076751	477	-1	NA	DNA recombination-mediator protein A
187	Sl_PCC6715	BRW62_RS01545	NZ_CP018092	301237	302169	933	1	NA	23S rRNA (guanosine(2251)-2'-O)-methyltransferase RlmB
187	T_CL_1	FFX45_11450	CP040671	2327794	2328675	882	-1	rlmB	23S rRNA (guanosine(2251)-2'-O)-methyltransferase RlmB
187	T_NK55	NK55_RS01985	NC_023033	403908	404795	888	1	NA	23S rRNA (guanosine(2251)-2'-O)-methyltransferase RlmB
187	Te_BP_1	tll1042	NC_004113	1076384	1077271	888	-1	NA	23S rRNA (guanosine(2251)-2'-O)-methyltransferase RlmB
187	Te_PKUAC_SCTE542	D3A95_00485	CP032152	106034	106906	873	-1	rlmB	23S rRNA (guanosine(2251)-2'-O)-methyltransferase RlmB
187	Tv_NIES_2134	CDC40_RS03530	NZ_AP018202	706896	707783	888	1	rlmB	23S rRNA (guanosine(2251)-2'-O)-methyltransferase RlmB
188	Sl_PCC6715	BRW62_RS01555	NZ_CP018092	302756	304042	1287	-1	NA	sugar ABC transporter substrate-binding protein
188	T_CL_1	FFX45_05240	CP040671	1022585	1023856	1272	-1	NA	sugar ABC transporter substrate-binding protein
188	T_NK55	NK55_RS08385	NC_023033	1721514	1722779	1266	1	NA	sugar ABC transporter substrate-binding protein
188	Te_BP_1	tlr2048	NC_004113	2128698	2130011	1314	1	NA	sugar ABC transporter periplasmic sugar-binding protein
188	Te_PKUAC_SCTE542	D3A95_08290	CP032152	1668417	1669688	1272	1	NA	sugar ABC transporter substrate-binding protein
188	Tv_NIES_2134	CDC40_RS11305	NZ_AP018202	2295870	2297183	1314	1	NA	sugar ABC transporter substrate-binding protein
189	Sl_PCC6715	BRW62_RS01570	NZ_CP018092	305458	306297	840	1	NA	prohibitin family protein
189	T_CL_1	FFX45_07320	CP040671	1453615	1454454	840	1	NA	prohibitin family protein
189	T_NK55	NK55_RS05585	NC_023033	1159236	1160081	846	1	NA	prohibitin family protein
189	Te_BP_1	tlr1760	NC_004113	1843125	1843988	864	1	NA	prohibitin
189	Te_PKUAC_SCTE542	D3A95_10295	CP032152	2060818	2061651	834	1	NA	prohibitin family protein
189	Tv_NIES_2134	CDC40_RS08330	NZ_AP018202	1717865	1718728	864	1	NA	prohibitin family protein
190	Sl_PCC6715	BRW62_RS01585	NZ_CP018092	308694	309449	756	1	NA	di-trans,poly-cis-decaprenylcistransferase
190	T_CL_1	FFX45_07335	CP040671	1456854	1457609	756	1	uppS	di-trans,poly-cis-decaprenylcistransferase
190	T_NK55	NK55_RS05600	NC_023033	1162429	1163178	750	1	NA	di-trans,poly-cis-decaprenylcistransferase
190	Te_BP_1	tlr1763	NC_004113	1846311	1847066	756	1	NA	undecaprenyl pyrophosphate synthase
190	Te_PKUAC_SCTE542	D3A95_10310	CP032152	2064002	2064757	756	1	uppS	di-trans,poly-cis-decaprenylcistransferase
190	Tv_NIES_2134	CDC40_RS08345	NZ_AP018202	1721051	1721806	756	1	NA	isoprenyl transferase
191	Sl_PCC6715	BRW62_RS01700	NZ_CP018092	333742	334002	261	1	NA	MoaD/ThiS family protein
191	T_CL_1	FFX45_09260	CP040671	1876447	1876701	255	1	NA	MoaD/ThiS family protein
191	T_NK55	NK55_RS02305	NC_023033	476252	476515	264	-1	NA	molybdopterin converting factor subunit 1
191	Te_BP_1	tsl1361	NC_004113	1420808	1421071	264	-1	NA	molybdopterin biosynthesis protein D chain
191	Te_PKUAC_SCTE542	D3A95_12650	CP032152	2557952	2558206	255	-1	NA	MoaD/ThiS family protein
191	Tv_NIES_2134	CDC40_RS05905	NZ_AP018202	1202075	1202338	264	1	NA	MoaD/ThiS family protein
192	Sl_PCC6715	BRW62_RS01705	NZ_CP018092	334005	334439	435	1	NA	molybdenum cofactor biosynthesis protein MoaE
192	T_CL_1	FFX45_09265	CP040671	1876709	1877155	447	1	NA	molybdenum cofactor biosynthesis protein MoaE
192	T_NK55	NK55_RS02300	NC_023033	475798	476244	447	-1	NA	molybdenum cofactor biosynthesis protein MoaE
192	Te_BP_1	tll1360	NC_004113	1420354	1420800	447	-1	moaE	molybdopterin (MPT) converting factor, subunit 2
192	Te_PKUAC_SCTE542	D3A95_12645	CP032152	2557486	2557944	459	-1	NA	molybdenum cofactor biosynthesis protein MoaE
192	Tv_NIES_2134	CDC40_RS05910	NZ_AP018202	1202346	1202792	447	1	NA	molybdenum cofactor biosynthesis protein MoaE
193	Sl_PCC6715	BRW62_RS01750	NZ_CP018092	342403	343521	1119	1	NA	deoxyhypusine synthase
193	T_CL_1	FFX45_01920	CP040671	383679	384842	1164	-1	NA	deoxyhypusine synthase
193	T_NK55	NK55_RS10795	NC_023033	2226885	2228048	1164	1	NA	deoxyhypusine synthase
193	Te_BP_1	tlr0818	NC_004113	843816	845021	1206	1	NA	deoxyhypusine synthase-like protein
193	Te_PKUAC_SCTE542	D3A95_03760	CP032152	763364	764563	1200	1	NA	deoxyhypusine synthase
193	Tv_NIES_2134	CDC40_RS05475	NZ_AP018202	1113913	1115118	1206	-1	NA	deoxyhypusine synthase
194	Sl_PCC6715	BRW62_RS01765	NZ_CP018092	345289	346485	1197	1	NA	peptidylprolyl isomerase
194	T_CL_1	FFX45_01905	CP040671	380755	381861	1107	-1	NA	peptidylprolyl isomerase
194	T_NK55	NK55_RS10810	NC_023033	2229798	2230976	1179	1	NA	peptidylprolyl isomerase
194	Te_BP_1	tlr0821	NC_004113	846771	847949	1179	1	NA	peptidyl-prolyl cis-trans isomerase
194	Te_PKUAC_SCTE542	D3A95_03775	CP032152	766393	767499	1107	1	NA	peptidylprolyl isomerase
194	Tv_NIES_2134	CDC40_RS05460	NZ_AP018202	1110985	1112163	1179	-1	NA	peptidylprolyl isomerase
195	Sl_PCC6715	BRW62_RS01775	NZ_CP018092	347052	347393	342	1	NA	metal-sensing transcriptional repressor
195	T_CL_1	FFX45_10090	CP040671	2044449	2044772	324	1	NA	metal-sensing transcriptional repressor
195	T_NK55	NK55_RS04635	NC_023033	961069	961392	324	1	NA	metal-sensing transcriptional repressor
195	Te_BP_1	tlr1576	NC_004113	1639834	1640157	324	1	NA	hypothetical protein
195	Te_PKUAC_SCTE542	D3A95_11880	CP032152	2398095	2398418	324	-1	NA	hypothetical protein
195	Tv_NIES_2134	CDC40_RS07405	NZ_AP018202	1517381	1517704	324	1	NA	metal-sensing transcriptional repressor
196	Sl_PCC6715	BRW62_RS01785	NZ_CP018092	347732	348604	873	1	NA	DNA adenine methylase
196	T_CL_1	FFX45_10100	CP040671	2045090	2045959	870	1	NA	DNA adenine methylase
196	T_NK55	NK55_RS04645	NC_023033	961713	962585	873	1	NA	DNA adenine methylase
196	Te_BP_1	tlr1578	NC_004113	1640478	1641335	858	1	NA	adenine-specific DNA methyltransferase
196	Te_PKUAC_SCTE542	D3A95_11870	CP032152	2396918	2397775	858	-1	NA	DNA adenine methylase
196	Tv_NIES_2134	CDC40_RS07415	NZ_AP018202	1518025	1518882	858	1	NA	DNA adenine methylase
197	Sl_PCC6715	BRW62_RS01790	NZ_CP018092	348595	349776	1182	1	NA	molybdopterin molybdotransferase MoeA
197	T_CL_1	FFX45_09245	CP040671	1873254	1874429	1176	1	NA	molybdopterin molybdotransferase MoeA
197	T_NK55	NK55_RS02320	NC_023033	478533	479708	1176	-1	NA	molybdopterin molybdotransferase MoeA
197	Te_BP_1	tll1364	NC_004113	1423089	1424264	1176	-1	moeA	molybdopterin biosynthesis protein
197	Te_PKUAC_SCTE542	D3A95_12665	CP032152	2560221	2561396	1176	-1	NA	molybdopterin molybdenumtransferase MoeA
197	Tv_NIES_2134	CDC40_RS05890	NZ_AP018202	1198882	1200057	1176	1	NA	molybdopterin molybdotransferase MoeA
198	Sl_PCC6715	BRW62_RS01795	NZ_CP018092	350060	351124	1065	-1	NA	3-deoxy-7-phosphoheptulonate synthase
198	T_CL_1	FFX45_10050	CP040671	2038670	2039731	1062	-1	NA	3-deoxy-7-phosphoheptulonate synthase
198	T_NK55	NK55_RS04600	NC_023033	955488	956549	1062	-1	NA	3-deoxy-7-phosphoheptulonate synthase
198	Te_BP_1	tll1569	NC_004113	1634255	1635316	1062	-1	NA	phospho-2-dehydro-3-deoxyheptonate aldolase
198	Te_PKUAC_SCTE542	D3A95_11910	CP032152	2402551	2403612	1062	1	NA	3-deoxy-7-phosphoheptulonate synthase
198	Tv_NIES_2134	CDC40_RS07370	NZ_AP018202	1511802	1512863	1062	-1	NA	3-deoxy-7-phosphoheptulonate synthase
199	Sl_PCC6715	BRW62_RS01800	NZ_CP018092	351173	352309	1137	-1	NA	YjgP/YjgQ family permease
199	T_CL_1	FFX45_10055	CP040671	2039767	2040903	1137	-1	NA	YjgP/YjgQ family permease
199	T_NK55	NK55_RS04605	NC_023033	956585	957721	1137	-1	NA	YjgP/YjgQ family permease
199	Te_BP_1	tll1570	NC_004113	1635352	1636488	1137	-1	NA	hypothetical protein
199	Te_PKUAC_SCTE542	D3A95_11905	CP032152	2401379	2402515	1137	1	NA	YjgP/YjgQ family permease
199	Tv_NIES_2134	CDC40_RS07375	NZ_AP018202	1512899	1514035	1137	-1	NA	YjgP/YjgQ family permease
200	Sl_PCC6715	BRW62_RS01805	NZ_CP018092	352311	353099	789	-1	lptB	LPS export ABC transporter ATP-binding protein
200	T_CL_1	FFX45_10060	CP040671	2040906	2041694	789	-1	lptB	LPS export ABC transporter ATP-binding protein
200	T_NK55	NK55_RS04610	NC_023033	957724	958485	762	-1	NA	LPS export ABC transporter ATP-binding protein
200	Te_BP_1	tll1571	NC_004113	1636491	1637279	789	-1	NA	ABC transporter ATP-binding protein
200	Te_PKUAC_SCTE542	D3A95_11900	CP032152	2400588	2401376	789	1	lptB	LPS export ABC transporter ATP-binding protein
200	Tv_NIES_2134	CDC40_RS07380	NZ_AP018202	1514038	1514826	789	-1	lptB	LPS export ABC transporter ATP-binding protein
201	Sl_PCC6715	BRW62_RS01810	NZ_CP018092	353059	353487	429	-1	NA	OstA family protein
201	T_CL_1	FFX45_10065	CP040671	2041654	2042100	447	-1	NA	OstA family protein
201	T_NK55	NK55_RS04615	NC_023033	958472	958918	447	-1	NA	sugar ABC substrate-binding protein
201	Te_BP_1	tll1572	NC_004113	1637239	1637685	447	-1	NA	hypothetical protein
201	Te_PKUAC_SCTE542	D3A95_11895	CP032152	2400182	2400628	447	1	NA	OstA family protein
201	Tv_NIES_2134	CDC40_RS07385	NZ_AP018202	1514786	1515232	447	-1	NA	hypothetical protein
202	Sl_PCC6715	BRW62_RS01815	NZ_CP018092	353546	354523	978	1	holA	DNA polymerase III subunit delta
202	T_CL_1	FFX45_10070	CP040671	2042140	2043168	1029	1	holA	DNA polymerase III subunit delta
202	T_NK55	NK55_RS04620	NC_023033	958958	959986	1029	1	NA	DNA polymerase III subunit delta
202	Te_BP_1	tlr1573	NC_004113	1637724	1638752	1029	1	NA	DNA polymerase III subunit delta
202	Te_PKUAC_SCTE542	D3A95_11890	CP032152	2399116	2400144	1029	-1	holA	DNA polymerase III subunit delta
202	Tv_NIES_2134	CDC40_RS07390	NZ_AP018202	1515271	1516299	1029	1	holA	DNA polymerase III subunit delta
203	Sl_PCC6715	BRW62_RS01820	NZ_CP018092	354490	354948	459	-1	NA	hypothetical protein
203	T_CL_1	FFX45_10075	CP040671	2043105	2043560	456	-1	NA	DUF948 domain-containing protein
203	T_NK55	NK55_RS04625	NC_023033	959923	960378	456	-1	NA	hypothetical protein
203	Te_BP_1	tll1574	NC_004113	1638689	1639144	456	-1	NA	hypothetical protein
203	Te_PKUAC_SCTE542	D3A95_11885	CP032152	2398724	2399179	456	1	NA	hypothetical protein
203	Tv_NIES_2134	CDC40_RS07395	NZ_AP018202	1516236	1516691	456	-1	NA	hypothetical protein
204	Sl_PCC6715	BRW62_RS01825	NZ_CP018092	355325	357376	2052	1	NA	DUF4101 domain-containing protein
204	T_CL_1	FFX45_12245	CP040671	2490219	2492231	2013	1	NA	DUF4101 domain-containing protein
204	T_NK55	NK55_RS10510	NC_023033	2164455	2166545	2091	1	NA	DUF4101 domain-containing protein
204	Te_BP_1	tlr0758	NC_004113	782410	784431	2022	1	NA	cell division protein Ftn2
204	Te_PKUAC_SCTE542	D3A95_11750	CP032152	2371888	2373900	2013	1	NA	DUF4101 domain-containing protein
204	Tv_NIES_2134	CDC40_RS01365	NZ_AP018202	274215	276236	2022	-1	NA	DUF4101 domain-containing protein
205	Sl_PCC6715	BRW62_RS01835	NZ_CP018092	358245	359402	1158	-1	NA	glutamine-hydrolyzing carbamoyl-phosphate synthase small subunit
205	T_CL_1	FFX45_12255	CP040671	2493099	2494247	1149	-1	carA	glutamine-hydrolyzing carbamoyl-phosphate synthase small subunit
205	T_NK55	NK55_RS10520	NC_023033	2167413	2168561	1149	-1	NA	glutamine-hydrolyzing carbamoyl-phosphate synthase small subunit
205	Te_BP_1	tll0760	NC_004113	785299	786447	1149	-1	NA	carbamoyl phosphate synthase small subunit
205	Te_PKUAC_SCTE542	D3A95_11760	CP032152	2374768	2375916	1149	-1	NA	carbamoyl-phosphate synthase small subunit
205	Tv_NIES_2134	CDC40_RS01355	NZ_AP018202	272199	273347	1149	1	NA	carbamoyl-phosphate synthase small subunit
206	Sl_PCC6715	BRW62_RS01840	NZ_CP018092	359481	360266	786	-1	NA	7-carboxy-7-deazaguanine synthase QueE
206	T_CL_1	FFX45_01010	CP040671	206615	207520	906	-1	NA	7-carboxy-7-deazaguanine synthase QueE
206	T_NK55	NK55_RS11245	NC_023033	2304449	2305207	759	-1	NA	7-carboxy-7-deazaguanine synthase QueE
206	Te_BP_1	tll0895	NC_004113	908769	909674	906	-1	NA	hypothetical protein
206	Te_PKUAC_SCTE542	D3A95_04680	CP032152	944160	945065	906	1	NA	7-carboxy-7-deazaguanine synthase QueE
206	Tv_NIES_2134	CDC40_RS05085	NZ_AP018202	1049290	1050195	906	1	NA	7-carboxy-7-deazaguanine synthase QueE
207	Sl_PCC6715	BRW62_RS01845	NZ_CP018092	360389	361303	915	1	NA	DUF928 domain-containing protein
207	T_CL_1	FFX45_01015	CP040671	207509	208432	924	1	NA	DUF928 domain-containing protein
207	T_NK55	NK55_RS11250	NC_023033	2305350	2306273	924	1	NA	DUF928 domain-containing protein
207	Te_BP_1	tlr0896	NC_004113	909663	910583	921	1	NA	hypothetical protein
207	Te_PKUAC_SCTE542	D3A95_04675	CP032152	943248	944171	924	-1	NA	DUF928 domain-containing protein
207	Tv_NIES_2134	CDC40_RS05080	NZ_AP018202	1048381	1049301	921	-1	NA	DUF928 domain-containing protein
208	Sl_PCC6715	BRW62_RS01850	NZ_CP018092	361913	362452	540	1	NA	hypothetical protein
208	T_CL_1	FFX45_01020	CP040671	208532	209095	564	1	NA	hypothetical protein
208	T_NK55	NK55_RS11255	NC_023033	2306373	2306933	561	1	NA	hypothetical protein
208	Te_BP_1	tlr0897	NC_004113	910684	911247	564	1	NA	hypothetical protein
208	Te_PKUAC_SCTE542	D3A95_04670	CP032152	942585	943148	564	-1	NA	hypothetical protein
208	Tv_NIES_2134	CDC40_RS05075	NZ_AP018202	1047717	1048280	564	-1	NA	hypothetical protein
209	Sl_PCC6715	BRW62_RS01855	NZ_CP018092	362445	363035	591	1	NA	dephospho-CoA kinase
209	T_CL_1	FFX45_01025	CP040671	209088	209699	612	1	NA	dephospho-CoA kinase
209	T_NK55	NK55_RS11260	NC_023033	2306926	2307537	612	1	NA	dephospho-CoA kinase
209	Te_BP_1	tlr0898	NC_004113	911240	911851	612	1	NA	hypothetical protein
209	Te_PKUAC_SCTE542	D3A95_04665	CP032152	941981	942592	612	-1	NA	dephospho-CoA kinase
209	Tv_NIES_2134	CDC40_RS05070	NZ_AP018202	1047113	1047724	612	-1	NA	dephospho-CoA kinase
210	Sl_PCC6715	BRW62_RS01860	NZ_CP018092	363032	363415	384	1	NA	photosystem II reaction center protein Psb28
210	T_CL_1	FFX45_05510	CP040671	1082129	1082461	333	1	NA	photosystem II reaction center protein Psb28
210	T_NK55	NK55_RS08760	NC_023033	1799220	1799552	333	1	NA	photosystem II reaction center protein Psb28
210	Te_BP_1	tlr0493	NC_004113	489529	489879	351	1	psbW	photosystem II reaction center protein Psb28
210	Te_PKUAC_SCTE542	D3A95_08585	CP032152	1723388	1723720	333	1	NA	photosystem II reaction center protein Psb28
210	Tv_NIES_2134	CDC40_RS01540	NZ_AP018202	315592	315942	351	1	NA	photosystem II reaction center protein Psb28
211	Sl_PCC6715	BRW62_RS01870	NZ_CP018092	364829	365581	753	-1	gloB	hydroxyacylglutathione hydrolase
211	T_CL_1	FFX45_05840	CP040671	1151431	1152189	759	1	gloB	hydroxyacylglutathione hydrolase
211	T_NK55	NK55_RS04950	NC_023033	1034190	1034948	759	-1	NA	hydroxyacylglutathione hydrolase
211	Te_BP_1	tll1639	NC_004113	1714229	1714987	759	-1	NA	hydroxyacylglutathione hydrolase
211	Te_PKUAC_SCTE542	D3A95_06330	CP032152	1287372	1288130	759	-1	gloB	hydroxyacylglutathione hydrolase
211	Tv_NIES_2134	CDC40_RS07710	NZ_AP018202	1590792	1591550	759	-1	gloB	hydroxyacylglutathione hydrolase
212	Sl_PCC6715	BRW62_RS01880	NZ_CP018092	367207	367761	555	-1	NA	competence protein ComFB
212	T_CL_1	FFX45_01755	CP040671	357767	358321	555	-1	NA	competence protein ComFB
212	T_NK55	NK55_RS11015	NC_023033	2265096	2265650	555	1	NA	competence protein ComFB
212	Te_BP_1	tlr0849	NC_004113	869323	869877	555	1	NA	hypothetical protein
212	Te_PKUAC_SCTE542	D3A95_03925	CP032152	790206	790760	555	1	NA	competence protein ComFB
212	Tv_NIES_2134	CDC40_RS05315	NZ_AP018202	1089052	1089606	555	-1	NA	hypothetical protein
213	Sl_PCC6715	BRW62_RS01890	NZ_CP018092	368755	369009	255	1	NA	hypothetical protein
213	T_CL_1	FFX45_01380	CP040671	289677	289931	255	1	NA	hypothetical protein
213	T_NK55	NK55_RS11620	NC_023033	2394804	2395058	255	1	NA	hypothetical protein
213	Te_BP_1	tsr0968	NC_004113	990625	990879	255	1	NA	hypothetical protein
213	Te_PKUAC_SCTE542	D3A95_04310	CP032152	862529	862783	255	-1	NA	hypothetical protein
213	Tv_NIES_2134	CDC40_RS04710	NZ_AP018202	965508	965762	255	-1	NA	hypothetical protein
214	Sl_PCC6715	BRW62_RS01900	NZ_CP018092	370217	371401	1185	-1	NA	NAD(P)H-quinone oxidoreductase subunit H
214	T_CL_1	FFX45_09640	CP040671	1960211	1961395	1185	1	NA	NAD(P)H-quinone oxidoreductase subunit H
214	T_NK55	NK55_RS03415	NC_023033	701206	702390	1185	-1	NA	NAD(P)H-quinone oxidoreductase subunit H
214	Te_BP_1	tlr1288	NC_004113	1339078	1340262	1185	1	ndhH	NAD(P)H-quinone oxidoreductase subunit H
214	Te_PKUAC_SCTE542	D3A95_12270	CP032152	2476397	2477581	1185	-1	NA	NAD(P)H-quinone oxidoreductase subunit H
214	Tv_NIES_2134	CDC40_RS06290	NZ_AP018202	1283093	1284277	1185	-1	NA	NAD(P)H-quinone oxidoreductase subunit H
215	Sl_PCC6715	BRW62_RS01905	NZ_CP018092	371497	372786	1290	-1	NA	glucose-1-phosphate adenylyltransferase
215	T_CL_1	FFX45_09635	CP040671	1958809	1960122	1314	1	NA	glucose-1-phosphate adenylyltransferase
215	T_NK55	NK55_RS03420	NC_023033	702479	703768	1290	-1	NA	glucose-1-phosphate adenylyltransferase
215	Te_BP_1	tlr1287	NC_004113	1337676	1338989	1314	1	glgC	glucose-1-phosphate adenylyltransferase
215	Te_PKUAC_SCTE542	D3A95_12275	CP032152	2477677	2478966	1290	-1	NA	glucose-1-phosphate adenylyltransferase
215	Tv_NIES_2134	CDC40_RS06295	NZ_AP018202	1284366	1285655	1290	-1	NA	glucose-1-phosphate adenylyltransferase
216	Sl_PCC6715	BRW62_RS01910	NZ_CP018092	372936	373139	204	1	NA	translation initiation factor IF-2
216	T_CL_1	FFX45_09630	CP040671	1958483	1958689	207	-1	NA	translation initiation factor IF-2
216	T_NK55	NK55_RS03425	NC_023033	703912	704115	204	1	NA	hypothetical protein
216	Te_BP_1	tsl1286	NC_004113	1337353	1337556	204	-1	NA	hypothetical protein
216	Te_PKUAC_SCTE542	D3A95_12280	CP032152	2479110	2479313	204	1	NA	translation initiation factor IF-2
216	Tv_NIES_2134	CDC40_RS06300	NZ_AP018202	1285799	1286002	204	1	NA	hypothetical protein
217	Sl_PCC6715	BRW62_RS01920	NZ_CP018092	373681	374199	519	1	NA	photosystem II cytochrome PsbV2
217	T_CL_1	FFX45_09620	CP040671	1957413	1957940	528	-1	psbV2	photosystem II cytochrome PsbV2
217	T_NK55	NK55_RS03435	NC_023033	704659	705186	528	1	NA	photosystem II cytochrome PsbV2
217	Te_BP_1	tll1284	NC_004113	1336282	1336809	528	-1	psbV	cytochrome c-550
217	Te_PKUAC_SCTE542	D3A95_12290	CP032152	2479856	2480383	528	1	psbV2	photosystem II cytochrome PsbV2
217	Tv_NIES_2134	CDC40_RS06310	NZ_AP018202	1286546	1287073	528	1	psbV2	photosystem II cytochrome PsbV2
218	Sl_PCC6715	BRW62_RS01925	NZ_CP018092	374284	374622	339	1	NA	c-type cytochrome
218	T_CL_1	FFX45_09615	CP040671	1956975	1957313	339	-1	NA	c-type cytochrome
218	T_NK55	NK55_RS03440	NC_023033	705322	705624	303	1	NA	c-type cytochrome
218	Te_BP_1	tll1283	NC_004113	1335844	1336182	339	-1	petJ	cytochrome c553
218	Te_PKUAC_SCTE542	D3A95_12295	CP032152	2480483	2480821	339	1	NA	cytochrome C6
218	Tv_NIES_2134	CDC40_RS06315	NZ_AP018202	1287173	1287511	339	1	NA	c-type cytochrome
219	Sl_PCC6715	BRW62_RS01930	NZ_CP018092	374995	379632	4638	1	NA	glutamate synthase subunit alpha
219	T_CL_1	FFX45_09225	CP040671	1864272	1868897	4626	1	NA	glutamate synthase subunit alpha
219	T_NK55	NK55_RS02340	NC_023033	484084	488709	4626	-1	NA	glutamate synthase
219	Te_BP_1	tll1368	NC_004113	1428607	1433232	4626	-1	glsF	ferredoxin-dependent glutamate synthase
219	Te_PKUAC_SCTE542	D3A95_12685	CP032152	2565740	2570365	4626	-1	NA	glutamate synthase subunit alpha
219	Tv_NIES_2134	CDC40_RS05870	NZ_AP018202	1189914	1194539	4626	1	NA	glutamate synthase subunit alpha
220	Sl_PCC6715	BRW62_RS01945	NZ_CP018092	381359	382762	1404	-1	NA	NAD(P)(+) transhydrogenase (Re/Si-specific) subunit beta
220	T_CL_1	FFX45_11945	CP040671	2424110	2425510	1401	1	NA	NAD(P)(+) transhydrogenase (Re/Si-specific) subunit beta
220	T_NK55	NK55_RS10190	NC_023033	2084920	2086320	1401	1	NA	NAD(P)(+) transhydrogenase (Re/Si-specific) subunit beta
220	Te_BP_1	tlr0696	NC_004113	716770	718170	1401	1	pntB	pyridine nucleotide transhydrogenase subunit beta
220	Te_PKUAC_SCTE542	D3A95_11420	CP032152	2302137	2303537	1401	1	NA	NAD(P)(+) transhydrogenase (Re/Si-specific) subunit beta
220	Tv_NIES_2134	CDC40_RS11830	NZ_AP018202	2406059	2407459	1401	-1	NA	NAD(P)(+) transhydrogenase (Re/Si-specific) subunit beta
221	Sl_PCC6715	BRW62_RS01955	NZ_CP018092	383098	384252	1155	-1	NA	Re/Si-specific NAD(P)(+) transhydrogenase subunit alpha
221	T_CL_1	FFX45_11935	CP040671	2422647	2423801	1155	1	NA	Re/Si-specific NAD(P)(+) transhydrogenase subunit alpha
221	T_NK55	NK55_RS10180	NC_023033	2083457	2084611	1155	1	NA	Re/Si-specific NAD(P)(+) transhydrogenase subunit alpha
221	Te_BP_1	tlr0694	NC_004113	715307	716461	1155	1	pntA	pyridine nucleotide transhydrogenase subunit alpha
221	Te_PKUAC_SCTE542	D3A95_11410	CP032152	2300675	2301829	1155	1	NA	Re/Si-specific NAD(P)(+) transhydrogenase subunit alpha
221	Tv_NIES_2134	CDC40_RS11840	NZ_AP018202	2407768	2408922	1155	-1	NA	Re/Si-specific NAD(P)(+) transhydrogenase subunit alpha
222	Sl_PCC6715	BRW62_RS01965	NZ_CP018092	385240	386385	1146	-1	NA	NDP-sugar synthase
222	T_CL_1	FFX45_00035	CP040671	5860	7005	1146	1	NA	NDP-sugar synthase
222	T_NK55	NK55_RS00035	NC_023033	5817	6962	1146	1	NA	NDP-sugar synthase
222	Te_BP_1	tlr0611	NC_004113	617148	618293	1146	1	NA	mannose-1-phosphate guanylyltransferase
222	Te_PKUAC_SCTE542	D3A95_05260	CP032152	1071644	1072801	1158	1	NA	NDP-sugar synthase
222	Tv_NIES_2134	CDC40_RS04365	NZ_AP018202	887422	888567	1146	1	NA	NDP-sugar synthase
223	Sl_PCC6715	BRW62_RS01970	NZ_CP018092	386464	387162	699	-1	NA	helix-turn-helix domain-containing protein
223	T_CL_1	FFX45_00030	CP040671	5084	5788	705	1	NA	helix-turn-helix domain-containing protein
223	T_NK55	NK55_RS00030	NC_023033	5039	5746	708	1	NA	helix-turn-helix domain-containing protein
223	Te_BP_1	tlr0610	NC_004113	616378	617076	699	1	NA	hypothetical protein
223	Te_PKUAC_SCTE542	D3A95_05255	CP032152	1070823	1071509	687	1	NA	helix-turn-helix domain-containing protein
223	Tv_NIES_2134	CDC40_RS04360	NZ_AP018202	886652	887350	699	1	NA	helix-turn-helix domain-containing protein
224	Sl_PCC6715	BRW62_RS02000	NZ_CP018092	388796	389923	1128	1	NA	polysaccharide export protein
224	T_CL_1	FFX45_07360	CP040671	1462614	1463744	1131	-1	NA	polysaccharide export protein
224	T_NK55	NK55_RS05625	NC_023033	1168163	1169314	1152	-1	NA	polysaccharide export protein
224	Te_BP_1	tll1768	NC_004113	1852131	1853264	1134	-1	NA	polysaccharide export protein
224	Te_PKUAC_SCTE542	D3A95_10335	CP032152	2069732	2070874	1143	-1	NA	polysaccharide export protein
224	Tv_NIES_2134	CDC40_RS08370	NZ_AP018202	1726876	1728009	1134	-1	NA	polysaccharide export protein
225	Sl_PCC6715	BRW62_RS02080	NZ_CP018092	405837	406895	1059	1	NA	EpsG family protein
225	T_CL_1	FFX45_09025	CP040671	1823269	1824327	1059	-1	NA	EpsG family protein
225	T_NK55	NK55_RS03930	NC_023033	811674	812663	990	-1	NA	EpsG family protein
225	Te_BP_1	tll1203	NC_004113	1246443	1247504	1062	-1	NA	hypothetical protein
225	Te_PKUAC_SCTE542	D3A95_12890	CP032152	2611765	2612829	1065	1	NA	EpsG family protein
225	Tv_NIES_2134	CDC40_RS06640	NZ_AP018202	1359467	1360528	1062	-1	NA	EpsG family protein
226	Sl_PCC6715	BRW62_RS02085	NZ_CP018092	406897	408054	1158	1	NA	glycosyltransferase family 4 protein
226	T_CL_1	FFX45_09020	CP040671	1822113	1823312	1200	-1	NA	glycosyltransferase family 4 protein
226	T_NK55	NK55_RS12665	NC_023033	810468	811250	783	-1	NA	glycosyltransferase family 4 protein
226	Te_BP_1	tll1202	NC_004113	1245260	1246486	1227	-1	NA	glycosyl transferase family protein
226	Te_PKUAC_SCTE542	D3A95_12895	CP032152	2612786	2613985	1200	1	NA	glycosyltransferase family 1 protein
226	Tv_NIES_2134	CDC40_RS06635	NZ_AP018202	1358284	1359510	1227	-1	NA	glycosyltransferase family 4 protein
227	Sl_PCC6715	BRW62_RS02095	NZ_CP018092	409405	410427	1023	1	NA	NAD-dependent epimerase
227	T_CL_1	FFX45_09010	CP040671	1819722	1820738	1017	-1	NA	NAD-dependent epimerase
227	T_NK55	NK55_RS03915	NC_023033	808171	809187	1017	-1	NA	NAD-dependent epimerase
227	Te_BP_1	tll1200	NC_004113	1242931	1243947	1017	-1	NA	nucleotide sugar epimerase
227	Te_PKUAC_SCTE542	D3A95_12905	CP032152	2615322	2616344	1023	1	NA	NAD-dependent epimerase
227	Tv_NIES_2134	CDC40_RS06625	NZ_AP018202	1355955	1356971	1017	-1	NA	NAD-dependent epimerase
228	Sl_PCC6715	BRW62_RS02100	NZ_CP018092	410502	412817	2316	1	NA	polysaccharide biosynthesis tyrosine autokinase
228	T_CL_1	FFX45_09005	CP040671	1817356	1819704	2349	-1	NA	hypothetical protein
228	T_NK55	NK55_RS03910	NC_023033	805800	808151	2352	-1	NA	polysaccharide biosynthesis tyrosine autokinase
228	Te_BP_1	tll1199	NC_004113	1240551	1242911	2361	-1	NA	hypothetical protein
228	Te_PKUAC_SCTE542	D3A95_12910	CP032152	2616354	2618729	2376	1	NA	hypothetical protein
228	Tv_NIES_2134	CDC40_RS06620	NZ_AP018202	1353575	1355935	2361	-1	NA	hypothetical protein
229	Sl_PCC6715	BRW62_RS02105	NZ_CP018092	413057	414145	1089	1	NA	GTP-binding protein
229	T_CL_1	FFX45_04805	CP040671	945443	946489	1047	1	NA	GTP-binding protein
229	T_NK55	NK55_RS08105	NC_023033	1670322	1671377	1056	1	NA	GTP-binding protein
229	Te_BP_1	tlr2276	NC_004113	2367331	2368389	1059	1	NA	hypothetical protein
229	Te_PKUAC_SCTE542	D3A95_07785	CP032152	1564158	1565210	1053	1	NA	GTP-binding protein
229	Tv_NIES_2134	CDC40_RS10970	NZ_AP018202	2236350	2237408	1059	1	NA	GTP-binding protein
230	Sl_PCC6715	BRW62_RS02110	NZ_CP018092	414158	414310	153	1	NA	DUF2256 domain-containing protein
230	T_CL_1	FFX45_04810	CP040671	946499	946654	156	1	NA	DUF2256 domain-containing protein
230	T_NK55	NK55_RS08110	NC_023033	1671394	1671549	156	1	NA	DUF2256 domain-containing protein
230	Te_BP_1	tsr2277	NC_004113	2368410	2368565	156	1	NA	hypothetical protein
230	Te_PKUAC_SCTE542	D3A95_07790	CP032152	1565220	1565375	156	1	NA	DUF2256 domain-containing protein
230	Tv_NIES_2134	CDC40_RS10975	NZ_AP018202	2237418	2237573	156	1	NA	DUF2256 domain-containing protein
231	Sl_PCC6715	BRW62_RS02145	NZ_CP018092	419342	419728	387	-1	NA	DUF1257 domain-containing protein
231	T_CL_1	FFX45_04095	CP040671	798854	799240	387	1	NA	DUF1257 domain-containing protein
231	T_NK55	NK55_RS07475	NC_023033	1537775	1538161	387	1	NA	DUF1257 domain-containing protein
231	Te_BP_1	tlr2139	NC_004113	2222273	2222659	387	1	ycf35	hypothetical protein
231	Te_PKUAC_SCTE542	D3A95_07065	CP032152	1421197	1421583	387	1	NA	DUF1257 domain-containing protein
231	Tv_NIES_2134	CDC40_RS10250	NZ_AP018202	2091292	2091678	387	1	NA	DUF1257 domain-containing protein
232	Sl_PCC6715	BRW62_RS02150	NZ_CP018092	419749	419958	210	-1	NA	DUF2997 domain-containing protein
232	T_CL_1	FFX45_04090	CP040671	798618	798833	216	1	NA	DUF2997 domain-containing protein
232	T_NK55	NK55_RS07470	NC_023033	1537545	1537754	210	1	NA	DUF2997 domain-containing protein
232	Te_BP_1	tsr2138	NC_004113	2222037	2222252	216	1	NA	hypothetical protein
232	Te_PKUAC_SCTE542	D3A95_07060	CP032152	1420961	1421176	216	1	NA	DUF2997 domain-containing protein
232	Tv_NIES_2134	CDC40_RS10245	NZ_AP018202	2091062	2091271	210	1	NA	DUF2997 domain-containing protein
233	Sl_PCC6715	BRW62_RS02160	NZ_CP018092	420695	421405	711	1	NA	Crp/Fnr family transcriptional regulator
233	T_CL_1	FFX45_04085	CP040671	797365	798060	696	-1	NA	Crp/Fnr family transcriptional regulator
233	T_NK55	NK55_RS07465	NC_023033	1536421	1537116	696	-1	NA	Crp/Fnr family transcriptional regulator
233	Te_BP_1	tll2136	NC_004113	2219813	2220529	717	-1	NA	transcriptional regulator
233	Te_PKUAC_SCTE542	D3A95_07050	CP032152	1419475	1420170	696	-1	NA	Crp/Fnr family transcriptional regulator
233	Tv_NIES_2134	CDC40_RS10240	NZ_AP018202	2089939	2090634	696	-1	NA	Crp/Fnr family transcriptional regulator
234	Sl_PCC6715	BRW62_RS02170	NZ_CP018092	422133	422678	546	1	NA	hypothetical protein
234	T_CL_1	FFX45_12865	CP040671	2620431	2620997	567	-1	NA	hypothetical protein
234	T_NK55	NK55_RS12080	NC_023033	2494852	2495160	309	-1	NA	hypothetical protein
234	Te_BP_1	tll0580	NC_004113	584772	585338	567	-1	NA	hypothetical protein
234	Te_PKUAC_SCTE542	D3A95_05100	CP032152	1037563	1038129	567	-1	NA	hypothetical protein
234	Tv_NIES_2134	CDC40_RS04205	NZ_AP018202	855050	855616	567	-1	NA	hypothetical protein
235	Sl_PCC6715	BRW62_RS02185	NZ_CP018092	426308	426757	450	-1	NA	DUF4278 domain-containing protein
235	T_CL_1	FFX45_05675	CP040671	1111532	1111990	459	1	NA	DUF4278 domain-containing protein
235	T_NK55	NK55_RS12695	NC_023033	1068112	1068570	459	-1	NA	DUF4278 domain-containing protein
235	Te_BP_1	tll1670	NC_004113	1752623	1753081	459	-1	NA	hypothetical protein
235	Te_PKUAC_SCTE542	D3A95_03120	CP032152	640210	640668	459	-1	NA	DUF4278 domain-containing protein
235	Tv_NIES_2134	CDC40_RS07860	NZ_AP018202	1627382	1627840	459	-1	NA	DUF4278 domain-containing protein
236	Sl_PCC6715	BRW62_RS02190	NZ_CP018092	427001	427639	639	-1	NA	Crp/Fnr family transcriptional regulator
236	T_CL_1	FFX45_05670	CP040671	1110667	1111284	618	1	NA	Crp/Fnr family transcriptional regulator
236	T_NK55	NK55_RS05115	NC_023033	1068808	1069425	618	-1	NA	Crp/Fnr family transcriptional regulator
236	Te_BP_1	tll1671	NC_004113	1753319	1753936	618	-1	NA	transcriptional regulator
236	Te_PKUAC_SCTE542	D3A95_03125	CP032152	640909	641526	618	-1	NA	Crp/Fnr family transcriptional regulator
236	Tv_NIES_2134	CDC40_RS07865	NZ_AP018202	1628078	1628695	618	-1	NA	Crp/Fnr family transcriptional regulator
237	Sl_PCC6715	BRW62_RS02205	NZ_CP018092	430029	430397	369	1	NA	hypothetical protein
237	T_CL_1	FFX45_05655	CP040671	1107674	1108039	366	-1	NA	hypothetical protein
237	T_NK55	NK55_RS05130	NC_023033	1072065	1072430	366	1	NA	hypothetical protein
237	Te_BP_1	tlr1674	NC_004113	1756563	1756928	366	1	NA	hypothetical protein
237	Te_PKUAC_SCTE542	D3A95_03140	CP032152	644152	644517	366	1	NA	hypothetical protein
237	Tv_NIES_2134	CDC40_RS07880	NZ_AP018202	1631322	1631687	366	1	NA	hypothetical protein
238	Sl_PCC6715	BRW62_RS02215	NZ_CP018092	430857	431429	573	1	def	peptide deformylase
238	T_CL_1	FFX45_05645	CP040671	1106584	1107150	567	-1	def	peptide deformylase
238	T_NK55	NK55_RS05140	NC_023033	1072966	1073532	567	1	NA	peptide deformylase
238	Te_BP_1	tlr1676	NC_004113	1757441	1758007	567	1	def	peptide deformylase
238	Te_PKUAC_SCTE542	D3A95_03150	CP032152	645033	645599	567	1	def	peptide deformylase
238	Tv_NIES_2134	CDC40_RS07890	NZ_AP018202	1632198	1632764	567	1	def	peptide deformylase
239	Sl_PCC6715	BRW62_RS02220	NZ_CP018092	431441	431641	201	1	NA	hypothetical protein
239	T_CL_1	FFX45_05640	CP040671	1106368	1106565	198	-1	NA	hypothetical protein
239	T_NK55	NK55_RS05145	NC_023033	1073551	1073748	198	1	NA	hypothetical protein
239	Te_BP_1	tsr1677	NC_004113	1758026	1758223	198	1	NA	hypothetical protein
239	Te_PKUAC_SCTE542	D3A95_03155	CP032152	645622	645819	198	1	NA	hypothetical protein
239	Tv_NIES_2134	CDC40_RS07895	NZ_AP018202	1632783	1632980	198	1	NA	hypothetical protein
240	Sl_PCC6715	BRW62_RS02230	NZ_CP018092	432053	432988	936	1	NA	branched-chain amino acid ABC transporter permease
240	T_CL_1	FFX45_05630	CP040671	1105032	1105967	936	-1	NA	branched-chain amino acid ABC transporter permease
240	T_NK55	NK55_RS05155	NC_023033	1074149	1075084	936	1	NA	branched-chain amino acid ABC transporter permease
240	Te_BP_1	tlr1679	NC_004113	1758624	1759559	936	1	NA	branched-chain amino acid ABC transporter permease
240	Te_PKUAC_SCTE542	D3A95_03165	CP032152	646219	647154	936	1	NA	branched-chain amino acid ABC transporter permease
240	Tv_NIES_2134	CDC40_RS07905	NZ_AP018202	1633381	1634316	936	1	NA	branched-chain amino acid ABC transporter permease
241	Sl_PCC6715	BRW62_RS02235	NZ_CP018092	433027	433407	381	-1	NA	hypothetical protein
241	T_CL_1	FFX45_01650	CP040671	340585	340989	405	-1	NA	hypothetical protein
241	T_NK55	NK55_RS11120	NC_023033	2282492	2282896	405	1	NA	hypothetical protein
241	Te_BP_1	tlr0870	NC_004113	886724	887128	405	1	NA	hypothetical protein
241	Te_PKUAC_SCTE542	D3A95_04025	CP032152	806766	807170	405	1	NA	hypothetical protein
241	Tv_NIES_2134	CDC40_RS05210	NZ_AP018202	1071802	1072206	405	-1	NA	hypothetical protein
242	Sl_PCC6715	BRW62_RS02240	NZ_CP018092	433684	434586	903	1	NA	vitamin K epoxide reductase family protein
242	T_CL_1	FFX45_12910	CP040671	2633018	2633941	924	1	NA	vitamin K epoxide reductase family protein
242	T_NK55	NK55_RS12120	NC_023033	2505267	2506166	900	1	NA	vitamin K epoxide reductase family protein
242	Te_BP_1	tlr0588	NC_004113	595163	596086	924	1	NA	hypothetical protein
242	Te_PKUAC_SCTE542	D3A95_05155	CP032152	1050962	1051885	924	1	NA	hypothetical protein
242	Tv_NIES_2134	CDC40_RS04245	NZ_AP018202	865444	866367	924	1	NA	vitamin K epoxide reductase family protein
243	Sl_PCC6715	BRW62_RS02255	NZ_CP018092	436867	437730	864	1	NA	response regulator
243	T_CL_1	FFX45_05705	CP040671	1117293	1118159	867	1	NA	response regulator
243	T_NK55	NK55_RS05085	NC_023033	1062517	1063383	867	-1	NA	response regulator
243	Te_BP_1	tll1665	NC_004113	1746994	1747860	867	-1	NA	two-component response regulator
243	Te_PKUAC_SCTE542	D3A95_03085	CP032152	634121	634987	867	-1	NA	response regulator
243	Tv_NIES_2134	CDC40_RS07835	NZ_AP018202	1621755	1622621	867	-1	NA	response regulator
244	Sl_PCC6715	BRW62_RS02270	NZ_CP018092	439111	440202	1092	1	NA	ATP-binding cassette domain-containing protein
244	T_CL_1	FFX45_07300	CP040671	1449164	1450237	1074	1	NA	ATP-binding cassette domain-containing protein
244	T_NK55	NK55_RS05565	NC_023033	1154735	1155808	1074	1	NA	ATP-binding cassette domain-containing protein
244	Te_BP_1	tlr1756	NC_004113	1838667	1839740	1074	1	NA	sugar ABC transporter ATP-binding protein
244	Te_PKUAC_SCTE542	D3A95_10275	CP032152	2056368	2057441	1074	1	NA	ATP-binding cassette domain-containing protein
244	Tv_NIES_2134	CDC40_RS08310	NZ_AP018202	1713407	1714480	1074	1	NA	ATP-binding cassette domain-containing protein
245	Sl_PCC6715	BRW62_RS02275	NZ_CP018092	440297	441268	972	1	sds	solanesyl diphosphate synthase
245	T_CL_1	FFX45_07305	CP040671	1450332	1451303	972	1	sds	solanesyl diphosphate synthase
245	T_NK55	NK55_RS05570	NC_023033	1155903	1156874	972	1	NA	solanesyl diphosphate synthase
245	Te_BP_1	tlr1757	NC_004113	1839835	1840806	972	1	sds	solanesyl diphosphate synthase
245	Te_PKUAC_SCTE542	D3A95_10280	CP032152	2057536	2058507	972	1	sds	solanesyl diphosphate synthase
245	Tv_NIES_2134	CDC40_RS08315	NZ_AP018202	1714575	1715546	972	1	sds	solanesyl diphosphate synthase
246	Sl_PCC6715	BRW62_RS02280	NZ_CP018092	441363	441926	564	1	lepB	signal peptidase I
246	T_CL_1	FFX45_03565	CP040671	699746	700315	570	1	lepB	signal peptidase I
246	T_NK55	NK55_RS06975	NC_023033	1442672	1443241	570	1	NA	signal peptidase I
246	Te_BP_1	tlr0405	NC_004113	402001	402570	570	1	NA	signal peptidase I
246	Te_PKUAC_SCTE542	D3A95_06540	CP032152	1323199	1323768	570	1	lepB	signal peptidase I
246	Tv_NIES_2134	CDC40_RS09715	NZ_AP018202	1992412	1992981	570	1	lepB	signal peptidase I
247	Sl_PCC6715	BRW62_RS02285	NZ_CP018092	442007	442729	723	1	NA	DUF4079 domain-containing protein
247	T_CL_1	FFX45_03185	CP040671	629515	630228	714	-1	NA	DUF4079 domain-containing protein
247	T_NK55	NK55_RS06850	NC_023033	1420814	1421530	717	1	NA	DUF4079 domain-containing protein
247	Te_BP_1	tlr2008	NC_004113	2094816	2095532	717	1	NA	hypothetical protein
247	Te_PKUAC_SCTE542	D3A95_02805	CP032152	571480	572196	717	-1	NA	DUF4079 family protein
247	Tv_NIES_2134	CDC40_RS09590	NZ_AP018202	1970528	1971244	717	1	NA	DUF4079 domain-containing protein
248	Sl_PCC6715	BRW62_RS02290	NZ_CP018092	442794	443624	831	1	NA	undecaprenyl-diphosphate phosphatase
248	T_CL_1	FFX45_12125	CP040671	2466685	2467506	822	1	NA	undecaprenyl-diphosphate phosphatase
248	T_NK55	NK55_RS10370	NC_023033	2134071	2134892	822	1	NA	undecaprenyl-diphosphate phosphatase
248	Te_BP_1	tlr0737	NC_004113	760480	761301	822	1	NA	undecaprenyl pyrophosphate phosphatase
248	Te_PKUAC_SCTE542	D3A95_11630	CP032152	2349184	2350005	822	1	NA	undecaprenyl-diphosphate phosphatase
248	Tv_NIES_2134	CDC40_RS11645	NZ_AP018202	2364247	2365068	822	-1	NA	undecaprenyl-diphosphate phosphatase
249	Sl_PCC6715	BRW62_RS02300	NZ_CP018092	444799	446154	1356	-1	NA	TldD/PmbA family protein
249	T_CL_1	FFX45_11830	CP040671	2402125	2403366	1242	1	NA	TldD/PmbA family protein
249	T_NK55	NK55_RS01790	NC_023033	364171	365511	1341	1	NA	TldD/PmbA family protein
249	Te_BP_1	tll1080	NC_004113	1114866	1116107	1242	-1	NA	modulator of DNA gyrase
249	Te_PKUAC_SCTE542	D3A95_00880	CP032152	180703	181974	1272	1	NA	TldD/PmbA family protein
249	Tv_NIES_2134	CDC40_RS03335	NZ_AP018202	668074	669315	1242	1	NA	TldD/PmbA family protein
250	Sl_PCC6715	BRW62_RS02310	NZ_CP018092	448164	448823	660	1	NA	ATP phosphoribosyltransferase
250	T_CL_1	FFX45_11175	CP040671	2269093	2269728	636	-1	NA	ATP phosphoribosyltransferase
250	T_NK55	NK55_RS01145	NC_023033	233588	234223	636	1	NA	ATP phosphoribosyltransferase
250	Te_BP_1	tll0180	NC_004113	159583	160218	636	-1	hisG	ATP phosphoribosyltransferase
250	Te_PKUAC_SCTE542	D3A95_00955	CP032152	193439	194074	636	1	NA	ATP phosphoribosyltransferase
250	Tv_NIES_2134	CDC40_RS02330	NZ_AP018202	467721	468356	636	-1	NA	ATP phosphoribosyltransferase
251	Sl_PCC6715	BRW62_RS02315	NZ_CP018092	448973	449281	309	1	NA	hypothetical protein
251	T_CL_1	FFX45_07715	CP040671	1534796	1535128	333	-1	NA	hypothetical protein
251	T_NK55	NK55_RS04120	NC_023033	856028	856333	306	-1	NA	hypothetical protein
251	Te_BP_1	tll1238	NC_004113	1283279	1283611	333	-1	NA	hypothetical protein
251	Te_PKUAC_SCTE542	D3A95_02155	CP032152	443853	444158	306	1	NA	hypothetical protein
251	Tv_NIES_2134	CDC40_RS06830	NZ_AP018202	1403415	1403747	333	-1	NA	hypothetical protein
252	Sl_PCC6715	BRW62_RS02325	NZ_CP018092	451238	452110	873	1	NA	NAD-dependent epimerase/dehydratase family protein
252	T_CL_1	FFX45_00270	CP040671	56210	57082	873	1	NA	NAD-dependent epimerase/dehydratase family protein
252	T_NK55	NK55_RS00255	NC_023033	55331	56203	873	1	NA	NAD-dependent epimerase/dehydratase family protein
252	Te_BP_1	tll0360	NC_004113	353387	354259	873	-1	NA	hypothetical protein
252	Te_PKUAC_SCTE542	D3A95_05525	CP032152	1126363	1127235	873	1	NA	NAD-dependent epimerase/dehydratase family protein
252	Tv_NIES_2134	CDC40_RS00440	NZ_AP018202	87681	88553	873	-1	NA	NAD-dependent epimerase/dehydratase family protein
253	Sl_PCC6715	BRW62_RS02330	NZ_CP018092	452120	452794	675	-1	NA	class I SAM-dependent methyltransferase
253	T_CL_1	FFX45_03465	CP040671	683200	683856	657	-1	NA	class I SAM-dependent methyltransferase
253	T_NK55	NK55_RS06570	NC_023033	1371692	1372342	651	1	NA	class I SAM-dependent methyltransferase
253	Te_BP_1	tlr1953	NC_004113	2038527	2039183	657	1	NA	hypothetical protein
253	Te_PKUAC_SCTE542	D3A95_06450	CP032152	1306650	1307309	660	-1	NA	class I SAM-dependent methyltransferase
253	Tv_NIES_2134	CDC40_RS09305	NZ_AP018202	1915063	1915719	657	1	NA	class I SAM-dependent methyltransferase
254	Sl_PCC6715	BRW62_RS02350	NZ_CP018092	454811	456091	1281	-1	NA	phosphopyruvate hydratase
254	T_CL_1	FFX45_10255	CP040671	2085357	2086637	1281	1	NA	phosphopyruvate hydratase
254	T_NK55	NK55_RS01430	NC_023033	286856	288136	1281	-1	NA	phosphopyruvate hydratase
254	Te_BP_1	tlr0658	NC_004113	673847	675127	1281	1	eno	phosphopyruvate hydratase
254	Te_PKUAC_SCTE542	D3A95_01895	CP032152	379874	381154	1281	-1	NA	phosphopyruvate hydratase
254	Tv_NIES_2134	CDC40_RS02930	NZ_AP018202	588318	589598	1281	-1	NA	phosphopyruvate hydratase
255	Sl_PCC6715	BRW62_RS02405	NZ_CP018092	471533	473878	2346	-1	NA	diguanylate cyclase
255	T_CL_1	FFX45_01180	CP040671	246248	248566	2319	1	NA	diguanylate cyclase
255	T_NK55	NK55_RS12565	NC_023033	2339555	2341873	2319	1	NA	diguanylate cyclase
255	Te_BP_1	tlr0924	NC_004113	944011	946332	2322	1	NA	hypothetical protein
255	Te_PKUAC_SCTE542	D3A95_04510	CP032152	903563	905881	2319	-1	NA	diguanylate cyclase
255	Tv_NIES_2134	CDC40_RS04925	NZ_AP018202	1008945	1011266	2322	-1	NA	diguanylate cyclase
256	Sl_PCC6715	BRW62_RS02415	NZ_CP018092	474740	475033	294	1	NA	2Fe-2S iron-sulfur cluster binding domain-containing protein
256	T_CL_1	FFX45_00140	CP040671	31567	31863	297	-1	NA	Ferredoxin-1
256	T_NK55	NK55_RS00100	NC_023033	22036	22332	297	-1	NA	Ferredoxin-1
256	Te_BP_1	tsl1009	NC_004113	1034109	1034405	297	-1	petF	ferredoxin I
256	Te_PKUAC_SCTE542	D3A95_05360	CP032152	1092749	1093045	297	-1	NA	Ferredoxin-1
256	Tv_NIES_2134	CDC40_RS04440	NZ_AP018202	902650	902946	297	-1	NA	Ferredoxin-1
257	Sl_PCC6715	BRW62_RS02425	NZ_CP018092	476276	478990	2715	-1	NA	CBS domain-containing protein
257	T_CL_1	FFX45_00960	CP040671	194149	196872	2724	1	NA	CBS domain-containing protein
257	T_NK55	NK55_RS11800	NC_023033	2431424	2434147	2724	-1	NA	CBS domain-containing protein
257	Te_BP_1	tll0519	NC_004113	515535	518258	2724	-1	NA	poly(A) polymerase
257	Te_PKUAC_SCTE542	D3A95_04730	CP032152	957033	959786	2754	-1	NA	CBS domain-containing protein
257	Tv_NIES_2134	CDC40_RS03925	NZ_AP018202	795791	798514	2724	-1	NA	CBS domain-containing protein
258	Sl_PCC6715	BRW62_RS02435	NZ_CP018092	479927	480469	543	1	NA	hypothetical protein
258	T_CL_1	FFX45_05680	CP040671	1112108	1112656	549	-1	NA	hypothetical protein
258	T_NK55	NK55_RS05105	NC_023033	1067451	1068029	579	1	NA	hypothetical protein
258	Te_BP_1	tlr1669	NC_004113	1751947	1752510	564	1	NA	hypothetical protein
258	Te_PKUAC_SCTE542	D3A95_03115	CP032152	639563	640102	540	1	NA	hypothetical protein
258	Tv_NIES_2134	CDC40_RS07855	NZ_AP018202	1626706	1627269	564	1	NA	hypothetical protein
259	Sl_PCC6715	BRW62_RS02445	NZ_CP018092	481537	481896	360	-1	NA	hypothetical protein
259	T_CL_1	FFX45_07075	CP040671	1403041	1403394	354	-1	NA	hypothetical protein
259	T_NK55	NK55_RS12405	NC_023033	1111120	1111473	354	-1	NA	hypothetical protein
259	Te_BP_1	tll1715	NC_004113	1795668	1796021	354	-1	NA	hypothetical protein
259	Te_PKUAC_SCTE542	D3A95_03360	CP032152	684626	684979	354	-1	NA	hypothetical protein
259	Tv_NIES_2134	CDC40_RS08095	NZ_AP018202	1670432	1670785	354	-1	NA	hypothetical protein
260	Sl_PCC6715	BRW62_RS02455	NZ_CP018092	483564	484292	729	1	NA	cell envelope integrity protein TolA
260	T_CL_1	FFX45_06500	CP040671	1278465	1279193	729	-1	NA	cell envelope integrity protein TolA
260	T_NK55	NK55_RS09180	NC_023033	1896668	1897396	729	1	NA	cell envelope integrity protein TolA
260	Te_BP_1	tll0392	NC_004113	389804	390532	729	-1	NA	hypothetical protein
260	Te_PKUAC_SCTE542	D3A95_09070	CP032152	1831726	1832454	729	1	NA	hypothetical protein
260	Tv_NIES_2134	CDC40_RS12480	NZ_AP018202	2537535	2538263	729	1	NA	cell envelope integrity protein TolA
261	Sl_PCC6715	BRW62_RS02465	NZ_CP018092	485596	486234	639	1	NA	histidine phosphatase family protein
261	T_CL_1	FFX45_06490	CP040671	1276567	1277205	639	-1	NA	histidine phosphatase family protein
261	T_NK55	NK55_RS09190	NC_023033	1898656	1899294	639	1	NA	histidine phosphatase family protein
261	Te_BP_1	tll0390	NC_004113	388164	388553	390	-1	NA	hypothetical protein
261	Te_PKUAC_SCTE542	D3A95_09080	CP032152	1833714	1834352	639	1	NA	histidine phosphatase family protein
261	Tv_NIES_2134	CDC40_RS12490	NZ_AP018202	2539514	2540161	648	1	NA	histidine phosphatase family protein
262	Sl_PCC6715	BRW62_RS02475	NZ_CP018092	487275	488237	963	1	NA	LysR family transcriptional regulator
262	T_CL_1	FFX45_05045	CP040671	989476	990438	963	1	NA	LysR family transcriptional regulator
262	T_NK55	NK55_RS08330	NC_023033	1712265	1713221	957	1	NA	LysR family transcriptional regulator
262	Te_BP_1	tlr2037	NC_004113	2119451	2120407	957	1	NA	transcriptional regulator
262	Te_PKUAC_SCTE542	D3A95_08045	CP032152	1614975	1615937	963	1	NA	LysR family transcriptional regulator
262	Tv_NIES_2134	CDC40_RS11250	NZ_AP018202	2286623	2287579	957	1	NA	LysR family transcriptional regulator
263	Sl_PCC6715	BRW62_RS02485	NZ_CP018092	489402	489887	486	-1	NA	cytochrome b6-f complex subunit IV
263	T_CL_1	FFX45_02045	CP040671	405122	405607	486	-1	NA	cytochrome b6-f complex subunit IV
263	T_NK55	NK55_RS10695	NC_023033	2208109	2208594	486	1	NA	cytochrome b6-f complex subunit IV
263	Te_BP_1	tlr0797	NC_004113	827130	827615	486	1	petD	cytochrome b6-f complex subunit IV
263	Te_PKUAC_SCTE542	D3A95_03650	CP032152	744483	744968	486	1	NA	cytochrome b6-f complex subunit 4
263	Tv_NIES_2134	CDC40_RS01175	NZ_AP018202	231891	232376	486	-1	NA	cytochrome b6-f complex subunit IV
264	Sl_PCC6715	BRW62_RS02490	NZ_CP018092	490008	490655	648	-1	NA	cytochrome b6
264	T_CL_1	FFX45_02050	CP040671	405714	406361	648	-1	NA	cytochrome b6
264	T_NK55	NK55_RS10690	NC_023033	2207356	2208003	648	1	NA	cytochrome b6
264	Te_BP_1	tlr0796	NC_004113	826377	827024	648	1	petB	cytochrome b6
264	Te_PKUAC_SCTE542	D3A95_03645	CP032152	743730	744377	648	1	NA	cytochrome b6
264	Tv_NIES_2134	CDC40_RS01180	NZ_AP018202	232482	233129	648	-1	NA	cytochrome b6
265	Sl_PCC6715	BRW62_RS02505	NZ_CP018092	492693	493184	492	1	NA	YajQ family cyclic di-GMP-binding protein
265	T_CL_1	FFX45_02065	CP040671	408325	408816	492	1	NA	YajQ family cyclic di-GMP-binding protein
265	T_NK55	NK55_RS10675	NC_023033	2204785	2205276	492	-1	NA	YajQ family cyclic di-GMP-binding protein
265	Te_BP_1	tll0793	NC_004113	823812	824303	492	-1	NA	nucleotide-binding protein
265	Te_PKUAC_SCTE542	D3A95_03630	CP032152	741273	741764	492	-1	NA	YajQ family cyclic di-GMP-binding protein
265	Tv_NIES_2134	CDC40_RS01195	NZ_AP018202	235203	235694	492	1	NA	YajQ family cyclic di-GMP-binding protein
266	Sl_PCC6715	BRW62_RS02510	NZ_CP018092	493202	493777	576	1	NA	DUF2854 domain-containing protein
266	T_CL_1	FFX45_02070	CP040671	408830	409369	540	1	NA	DUF2854 domain-containing protein
266	T_NK55	NK55_RS10670	NC_023033	2204232	2204771	540	-1	NA	DUF2854 domain-containing protein
266	Te_BP_1	tll0792	NC_004113	823259	823798	540	-1	NA	hypothetical protein
266	Te_PKUAC_SCTE542	D3A95_03625	CP032152	740720	741259	540	-1	NA	DUF2854 domain-containing protein
266	Tv_NIES_2134	CDC40_RS01200	NZ_AP018202	235708	236247	540	1	NA	DUF2854 domain-containing protein
267	Sl_PCC6715	BRW62_RS02520	NZ_CP018092	495885	497018	1134	1	dnaJ	molecular chaperone DnaJ
267	T_CL_1	FFX45_02080	CP040671	411506	412645	1140	1	dnaJ	molecular chaperone DnaJ
267	T_NK55	NK55_RS10660	NC_023033	2200970	2202091	1122	-1	NA	molecular chaperone DnaJ
267	Te_BP_1	tll0790	NC_004113	820001	821128	1128	-1	dnaJ	molecular chaperone DnaJ
267	Te_PKUAC_SCTE542	D3A95_03615	CP032152	737462	738589	1128	-1	dnaJ	molecular chaperone DnaJ
267	Tv_NIES_2134	CDC40_RS01210	NZ_AP018202	238378	239505	1128	1	dnaJ	molecular chaperone DnaJ
268	Sl_PCC6715	BRW62_RS02525	NZ_CP018092	497244	498437	1194	-1	NA	N-acetyltransferase
268	T_CL_1	FFX45_05985	CP040671	1179007	1180203	1197	-1	NA	N-acetyltransferase
268	T_NK55	NK55_RS06105	NC_023033	1267941	1269137	1197	-1	NA	N-acetyltransferase
268	Te_BP_1	tll1862	NC_004113	1949616	1950812	1197	-1	NA	hypothetical protein
268	Te_PKUAC_SCTE542	D3A95_06175	CP032152	1259336	1260529	1194	1	NA	N-acetyltransferase
268	Tv_NIES_2134	CDC40_RS08860	NZ_AP018202	1828116	1829312	1197	-1	NA	N-acetyltransferase
269	Sl_PCC6715	BRW62_RS02530	NZ_CP018092	498679	499569	891	1	NA	hypothetical protein
269	T_CL_1	FFX45_11095	CP040671	2252596	2253846	1251	-1	NA	hypothetical protein
269	T_NK55	NK55_RS12355	NC_023033	748874	749953	1080	1	NA	hypothetical protein
269	Te_BP_1	tlr0372	NC_004113	370100	371191	1092	1	NA	hypothetical protein
269	Te_PKUAC_SCTE542	D3A95_01035	CP032152	209299	210444	1146	1	NA	hypothetical protein
269	Tv_NIES_2134	CDC40_RS02125	NZ_AP018202	431774	432865	1092	1	NA	hypothetical protein
270	Sl_PCC6715	BRW62_RS02535	NZ_CP018092	499730	499942	213	-1	NA	hypothetical protein
270	T_CL_1	FFX45_12415	CP040671	2531758	2531994	237	-1	NA	hypothetical protein
270	T_NK55	NK55_RS02995	NC_023033	617921	618157	237	-1	NA	hypothetical protein
270	Te_BP_1	tsr1145	NC_004113	1177011	1177247	237	1	NA	hypothetical protein
270	Te_PKUAC_SCTE542	D3A95_02275	CP032152	473979	474215	237	-1	NA	hypothetical protein
270	Tv_NIES_2134	CDC40_RS00745	NZ_AP018202	149731	149967	237	1	NA	hypothetical protein
271	Sl_PCC6715	BRW62_RS02545	NZ_CP018092	502450	503901	1452	1	NA	amidophosphoribosyltransferase
271	T_CL_1	FFX45_05605	CP040671	1098230	1099678	1449	-1	NA	amidophosphoribosyltransferase
271	T_NK55	NK55_RS05180	NC_023033	1080514	1081962	1449	1	NA	amidophosphoribosyltransferase
271	Te_BP_1	tlr1684	NC_004113	1765018	1766466	1449	1	purF	amidophosphoribosyltransferase
271	Te_PKUAC_SCTE542	D3A95_03190	CP032152	652571	654019	1449	1	NA	amidophosphoribosyltransferase
271	Tv_NIES_2134	CDC40_RS07930	NZ_AP018202	1639774	1641222	1449	1	NA	amidophosphoribosyltransferase
272	Sl_PCC6715	BRW62_RS02570	NZ_CP018092	510195	511205	1011	-1	NA	ABC transporter permease
272	T_CL_1	FFX45_07840	CP040671	1564874	1565872	999	1	NA	ABC transporter permease
272	T_NK55	NK55_RS04210	NC_023033	879384	880385	1002	1	NA	ABC transporter permease
272	Te_BP_1	tlr1261	NC_004113	1309850	1310848	999	1	NA	oligopeptides ABC transporter permease protein
272	Te_PKUAC_SCTE542	D3A95_02170	CP032152	446827	447828	1002	-1	NA	ABC transporter permease
272	Tv_NIES_2134	CDC40_RS06950	NZ_AP018202	1430083	1431081	999	1	NA	ABC transporter permease
273	Sl_PCC6715	BRW62_RS02575	NZ_CP018092	511229	511810	582	-1	NA	dCTP deaminase
273	T_CL_1	FFX45_01890	CP040671	378485	379066	582	1	NA	dCTP deaminase
273	T_NK55	NK55_RS10885	NC_023033	2245674	2246255	582	-1	NA	dCTP deaminase
273	Te_BP_1	tll0824	NC_004113	849641	850222	582	-1	dcd	deoxycytidine triphosphate deaminase
273	Te_PKUAC_SCTE542	D3A95_03790	CP032152	769188	769769	582	-1	NA	dCTP deaminase
273	Tv_NIES_2134	CDC40_RS05445	NZ_AP018202	1108712	1109293	582	1	NA	dCTP deaminase
274	Sl_PCC6715	BRW62_RS02610	NZ_CP018092	519750	520058	309	1	NA	energy-coupling factor ABC transporter substrate-binding protein
274	T_CL_1	FFX45_12575	CP040671	2559098	2559403	306	-1	NA	energy-coupling factor ABC transporter substrate-binding protein
274	T_NK55	NK55_RS00785	NC_023033	161999	162289	291	1	NA	energy-coupling factor ABC transporter substrate-binding protein
274	Te_BP_1	tll2441	NC_004113	2555322	2555624	303	-1	NA	cobalt transport protein CbiN
274	Te_PKUAC_SCTE542	D3A95_02405	CP032152	497207	497506	300	-1	NA	energy-coupling factor ABC transporter substrate-binding protein
274	Tv_NIES_2134	CDC40_RS00615	NZ_AP018202	126538	126840	303	1	NA	energy-coupling factor ABC transporter substrate-binding protein
275	Sl_PCC6715	BRW62_RS02620	NZ_CP018092	520868	521728	861	1	NA	ABC transporter ATP-binding protein
275	T_CL_1	FFX45_12565	CP040671	2557440	2558300	861	-1	NA	ABC transporter ATP-binding protein
275	T_NK55	NK55_RS00795	NC_023033	163083	163937	855	1	NA	ABC transporter ATP-binding protein
275	Te_BP_1	tll2439	NC_004113	2553674	2554528	855	-1	NA	cobalt ABC transporter ATP-binding protein
275	Te_PKUAC_SCTE542	D3A95_02395	CP032152	495549	496409	861	-1	NA	ABC transporter ATP-binding protein
275	Tv_NIES_2134	CDC40_RS00625	NZ_AP018202	127634	128488	855	1	NA	ABC transporter ATP-binding protein
276	Sl_PCC6715	BRW62_RS02625	NZ_CP018092	521856	522218	363	1	NA	response regulator
276	T_CL_1	FFX45_12560	CP040671	2556990	2557352	363	-1	NA	response regulator
276	T_NK55	NK55_RS00800	NC_023033	164073	164435	363	1	NA	response regulator
276	Te_BP_1	tll2438	NC_004113	2553189	2553680	492	-1	NA	two-component response regulator
276	Te_PKUAC_SCTE542	D3A95_02390	CP032152	495063	495425	363	-1	NA	response regulator
276	Tv_NIES_2134	CDC40_RS00630	NZ_AP018202	128482	128973	492	1	NA	response regulator
277	Sl_PCC6715	BRW62_RS02635	NZ_CP018092	523714	526731	3018	-1	NA	AAA family ATPase
277	T_CL_1	FFX45_04290	CP040671	837432	840443	3012	1	NA	SMC family ATPase
277	T_NK55	NK55_RS07645	NC_023033	1572040	1575051	3012	1	NA	SMC family ATPase
277	Te_BP_1	tlr2175	NC_004113	2257275	2260286	3012	1	NA	hypothetical protein
277	Te_PKUAC_SCTE542	D3A95_07265	CP032152	1459061	1462072	3012	1	NA	SMC family ATPase
277	Tv_NIES_2134	CDC40_RS10435	NZ_AP018202	2127918	2130929	3012	1	NA	SMC family ATPase
278	Sl_PCC6715	BRW62_RS02645	NZ_CP018092	529448	529960	513	1	NA	hypothetical protein
278	T_CL_1	FFX45_04835	CP040671	950500	951012	513	1	NA	hypothetical protein
278	T_NK55	NK55_RS08130	NC_023033	1676700	1677212	513	1	NA	hypothetical protein
278	Te_BP_1	tlr2281	NC_004113	2372220	2372732	513	1	NA	hypothetical protein
278	Te_PKUAC_SCTE542	D3A95_07810	CP032152	1569814	1570326	513	1	NA	hypothetical protein
278	Tv_NIES_2134	CDC40_RS10995	NZ_AP018202	2241228	2241740	513	1	NA	hypothetical protein
279	Sl_PCC6715	BRW62_RS02670	NZ_CP018092	533877	534329	453	-1	NA	hypothetical protein
279	T_CL_1	FFX45_00405	CP040671	84631	85080	450	1	NA	hypothetical protein
279	T_NK55	NK55_RS00385	NC_023033	83131	83580	450	1	NA	polyketide cyclase / dehydrase family enzyme
279	Te_BP_1	tll0336	NC_004113	325394	325843	450	-1	NA	hypothetical protein
279	Te_PKUAC_SCTE542	D3A95_05660	CP032152	1154794	1155243	450	1	NA	hypothetical protein
279	Tv_NIES_2134	CDC40_RS00300	NZ_AP018202	58359	58808	450	-1	NA	membrane protein
280	Sl_PCC6715	BRW62_RS02705	NZ_CP018092	543854	544294	441	-1	NA	periplasmic heavy metal sensor
280	T_CL_1	FFX45_00510	CP040671	109003	109443	441	-1	NA	periplasmic heavy metal sensor
280	T_NK55	NK55_RS00460	NC_023033	99412	99840	429	-1	NA	periplasmic heavy metal sensor
280	Te_BP_1	tlr0319	NC_004113	304621	305049	429	1	NA	hypothetical protein
280	Te_PKUAC_SCTE542	D3A95_05765	CP032152	1177749	1178189	441	-1	NA	periplasmic heavy metal sensor
280	Tv_NIES_2134	CDC40_RS00210	NZ_AP018202	37637	38065	429	1	NA	periplasmic heavy metal sensor
281	Sl_PCC6715	BRW62_RS02710	NZ_CP018092	544349	544693	345	-1	NA	hypothetical protein
281	T_CL_1	FFX45_00515	CP040671	109515	109835	321	-1	NA	hypothetical protein
281	T_NK55	NK55_RS00465	NC_023033	99923	100246	324	-1	NA	hypothetical protein
281	Te_BP_1	tlr0318	NC_004113	304214	304537	324	1	NA	hypothetical protein
281	Te_PKUAC_SCTE542	D3A95_05770	CP032152	1178227	1178547	321	-1	NA	hypothetical protein
281	Tv_NIES_2134	CDC40_RS00205	NZ_AP018202	37230	37553	324	1	NA	hypothetical protein
282	Sl_PCC6715	BRW62_RS02715	NZ_CP018092	544690	545295	606	-1	NA	sigma-70 family RNA polymerase sigma factor
282	T_CL_1	FFX45_00520	CP040671	109832	110437	606	-1	NA	sigma-70 family RNA polymerase sigma factor
282	T_NK55	NK55_RS00470	NC_023033	100243	100848	606	-1	NA	sigma-70 family RNA polymerase sigma factor
282	Te_BP_1	tlr0317	NC_004113	303612	304217	606	1	sigH	RNA polymerase sigma factor
282	Te_PKUAC_SCTE542	D3A95_05775	CP032152	1178544	1179149	606	-1	NA	sigma-70 family RNA polymerase sigma factor
282	Tv_NIES_2134	CDC40_RS00200	NZ_AP018202	36628	37233	606	1	NA	sigma-70 family RNA polymerase sigma factor
283	Sl_PCC6715	BRW62_RS02720	NZ_CP018092	545391	546029	639	-1	NA	ATP-dependent protease
283	T_CL_1	FFX45_06395	CP040671	1259470	1260108	639	-1	NA	ATP-dependent protease
283	T_NK55	NK55_RS09325	NC_023033	1929337	1929975	639	1	NA	peptidase
283	Te_BP_1	tlr2461	NC_004113	2575826	2576464	639	1	NA	ATP-dependent proteinase
283	Te_PKUAC_SCTE542	D3A95_09185	CP032152	1853766	1854404	639	1	NA	ATP-dependent protease
283	Tv_NIES_2134	CDC40_RS12570	NZ_AP018202	2553239	2553877	639	1	NA	ATP-dependent protease
284	Sl_PCC6715	BRW62_RS02740	NZ_CP018092	547747	549372	1626	-1	NA	MBL fold metallo-hydrolase
284	T_CL_1	FFX45_12370	CP040671	2520915	2522537	1623	1	NA	MBL fold metallo-hydrolase
284	T_NK55	NK55_RS02945	NC_023033	607103	608725	1623	1	NA	MBL fold metallo-hydrolase
284	Te_BP_1	tll1155	NC_004113	1187807	1189429	1623	-1	NA	hypothetical protein
284	Te_PKUAC_SCTE542	D3A95_02230	CP032152	463134	464756	1623	1	NA	MBL fold metallo-hydrolase
284	Tv_NIES_2134	CDC40_RS00790	NZ_AP018202	159213	160835	1623	-1	NA	MBL fold metallo-hydrolase
285	Sl_PCC6715	BRW62_RS02770	NZ_CP018092	553554	554465	912	1	NA	beta-carotene hydroxylase
285	T_CL_1	FFX45_02870	CP040671	566221	567108	888	1	NA	beta-carotene hydroxylase
285	T_NK55	NK55_RS06295	NC_023033	1309381	1310268	888	1	NA	beta-carotene oxygenase CrtR
285	Te_BP_1	tlr1900	NC_004113	1986642	1987529	888	1	crtR	beta-carotene hydroxylase
285	Te_PKUAC_SCTE542	D3A95_06015	CP032152	1227161	1228048	888	-1	NA	beta-carotene hydroxylase
285	Tv_NIES_2134	CDC40_RS09050	NZ_AP018202	1865123	1866010	888	1	NA	beta-carotene hydroxylase
286	Sl_PCC6715	BRW62_RS02775	NZ_CP018092	554474	555433	960	1	NA	ABC transporter ATP-binding protein
286	T_CL_1	FFX45_02875	CP040671	567123	568082	960	1	NA	ABC transporter ATP-binding protein
286	T_NK55	NK55_RS06300	NC_023033	1310283	1311242	960	1	NA	ABC transporter ATP-binding protein
286	Te_BP_1	tlr1901	NC_004113	1987544	1988503	960	1	NA	ABC transporter ATP-binding protein
286	Te_PKUAC_SCTE542	D3A95_06010	CP032152	1226188	1227114	927	-1	NA	ABC transporter ATP-binding protein
286	Tv_NIES_2134	CDC40_RS09055	NZ_AP018202	1866025	1866984	960	1	NA	ABC transporter ATP-binding protein
287	Sl_PCC6715	BRW62_RS02820	NZ_CP018092	560024	560329	306	-1	NA	cell division protein SepF
287	T_CL_1	FFX45_12585	CP040671	2560410	2560715	306	1	NA	cell division protein SepF
287	T_NK55	NK55_RS00775	NC_023033	160555	160860	306	-1	NA	cell division protein SepF
287	Te_BP_1	tlr2443	NC_004113	2556746	2557051	306	1	ycf50	hypothetical protein
287	Te_PKUAC_SCTE542	D3A95_02415	CP032152	498512	498817	306	1	NA	cell division protein SepF
287	Tv_NIES_2134	CDC40_RS00605	NZ_AP018202	125111	125416	306	-1	NA	cell division protein SepF
288	Sl_PCC6715	BRW62_RS02830	NZ_CP018092	560927	561196	270	-1	rpsO	30S ribosomal protein S15
288	T_CL_1	FFX45_02195	CP040671	437979	438248	270	1	rpsO	30S ribosomal protein S15
288	T_NK55	NK55_RS03950	NC_023033	817103	817372	270	1	NA	30S ribosomal protein S15
288	Te_BP_1	tsr1207	NC_004113	1251828	1252097	270	1	rpsO	30S ribosomal protein S15
288	Te_PKUAC_SCTE542	D3A95_03495	CP032152	711728	711997	270	-1	rpsO	30S ribosomal protein S15
[truncated: 11,494 more rows]
